# Supplementary material
Source: MDPI journal article supplement (https://www.mdpi.com/2071-1050/14/5/3045)
Supplement: s1 [file s1]

## S6: Equations

### Equations for Driver 2

#### 1. Urban agriculture

$$UA_{min/max}(ha) ** = Y_{min/maxUA} \times (F_{prod(ha)} + Veg_{prod(ha)})$$

\*\* Possible reduced area due to Urban agriculture approaches

#### 2. Vertical farming

$$VF_{min/max}(ha) *** = \frac{Veg_{prod(\frac{Mg}{a})}}{Y_{min/maxVF}}$$

\*\*\* Possible production of whole German vegetable production in Vertical farming production systems

#### 3. Abandoned areas reduction due to usage

$$Ma_{usable(ha)} = Ab_{min/max}(ha) - (UA_{min/max}(ha) + VF_{min/max}(ha))$$

### Equations for Driver 4

#### 4. Algae

$$ALG_{summin/max(\frac{Mg}{a})} = ALG_{(ha)} \times Y_{min/maxALG(dm)}$$

### Equations for Driver 5

#### 5. Short rotation coppice on agricultural areas (maximum/minimum)

$$SRCAG_{min(ha)Year_{aim}} = \frac{(SRCAG_{min(ha)2050} - SRCAG_{min(ha)2020})}{(Year_{End} - Year_{Stat})} \times (Year_{Aim} - Year_{Stat})$$

$$SRCAG_{min/max(\frac{Mg}{a})} = SRC_{min/maxAG(ha)} \times Y_{min/maxSRC(dm)}$$

#### 6. Short rotation coppice on marginal areas

$$SRCMA_{min/max(\frac{Mg}{a})} = Ma_{usable(ha)} \times Y_{min/maxSRC(dm)}$$

#### 7. Short rotation coppices on currently used areas for energy plants

$$SRCCU_{max(\frac{Mg}{a})} = CU_{max(ha)} \times Y_{min/maxSRC(dm)}$$

#### 8. Miscanthus on marginal areas

$$MSCMA_{min/max(\frac{Mg}{a})} = Ma_{usable(ha)} \times Y_{min/maxMSC(dm)}$$

#### 9. Miscanthus on currently used areas for energy plants

$$MSCCU_{min/max(\frac{Mg}{a})} = CU_{max(ha)} \times Y_{min/maxSRC(dm)}$$

Equations for Driver 6

10. Paludiculture potentials

$$PAL_{summax}(\frac{Mg}{a}) = PAL_{max(ha)} \times Y_{min/maxPAL(dm)}$$

Equations for Driver 15

11. Sum of lignocellulosic materials suitable for PLA production (LIGP)

$$LIGP_{summin}(\frac{Mg}{a}) = QLIG_{mobi(dm)} + SRCAG_{min}(\frac{Mg}{a}) + SRCMA_{min}(\frac{Mg}{a}) + SRCCU_{min}(\frac{Mg}{a}) + MSCMA_{min}(\frac{Mg}{a}) \\ + MSCCU_{min}(\frac{Mg}{a}) + PAL_{summax}(\frac{Mg}{a})$$

$$LIGP_{summax}(\frac{Mg}{a}) = QLIG_{tech(dm)} + SRCAG_{max}(\frac{Mg}{a}) + SRCMA_{max}(\frac{Mg}{a}) + SRCCU_{max}(\frac{Mg}{a}) + MSCMA_{max}(\frac{Mg}{a}) \\ + MSCCU_{max}(\frac{Mg}{a}) + PAL_{summax}(\frac{Mg}{a})$$

12. PLA of food waste (PLAQFW)

$$PLAQFW_{max}(\frac{Mg}{a}) = \left( \left( QFW_{tech_{max}}(\frac{Mg}{a}) \times FOP \right) \times PLA_{LAC} \right) \\ PLAQFW_{min}(\frac{Mg}{a}) = \left( \left( QFW_{mobi_{min}}(\frac{Mg}{a}) \times FOP \right) \times PLA_{LAC} \right)$$

13. Share of plastic production of PLA from food waste material in comparison to national and international scale (PLAQFWS)

$$PLAQFWS_{GER_{min/max}}(\frac{Mg}{a}) = \left( \frac{PLAF_{min/max}(\frac{Mg}{a})}{POLD_{GER}} \right) \times 100$$

$$PLAQFWS_{EU_{min/max}}(\frac{Mg}{a}) = \left( \frac{PLAF_{min/max}(\frac{Mg}{a})}{POLD_{EU}} \right) \times 100$$

$$PLAQFWS_{EU_{min/max}}(\frac{Mg}{a}) = \left( \frac{PLAF_{min/max}(\frac{Mg}{a})}{POLP_{EU}} \right) \times 100$$

$$PLAQFWS_{World_{min/max}}(\frac{Mg}{a}) = \left( \frac{PLAF_{min/max}(\frac{Mg}{a})}{POLP_{World}} \right) \times 100$$

14. PLA of Lignocellulosic material (PLALIG)

$$PLALIG_{min/max}(\frac{Mg}{a}) = \left( LIGP_{summin/max}(\frac{Mg}{a}) \times LACA_{LIG_{min/max}} \right) \times PLA_{LACA_{min/max}}$$

15. Share of plastic production of PLA from lignocellulosic material in comparison to national and international scale (PLALIGS)

$$PLALIGS_{GER_{\min/\max}(\frac{Mg}{a})} = \left( \frac{PLALIG_{\min/\max}(\frac{Mg}{a})}{POLD_{GER}} \right) \times 100$$

$$PLALIGS_{EU_{\min/\max}(\frac{Mg}{a})} = \left( \frac{PLALIG_{\min/\max}(\frac{Mg}{a})}{POLD_{EU}} \right) \times 100$$

$$PLALIGS_{EU_{\min/\max}(\frac{Mg}{a})} = \left( \frac{PLALIG_{\min/\max}(\frac{Mg}{a})}{POLP_{EU}} \right) \times 100$$

$$PLALIGS_{World_{\min/\max}(\frac{Mg}{a})} = \left( \frac{PLALIG_{\min/\max}(\frac{Mg}{a})}{POLP_{World}} \right) \times 100$$

Equations for Driver 16

16. Sum of lignocellulosic materials suitable for ethanol production (LIGE)

$$LIGE_{summin}(\frac{Mg}{a}) = QBRETH_{min(dm)} + SRCAG_{min}(\frac{Mg}{a}) + SRCMA_{min}(\frac{Mg}{a}) + SRCCU_{min}(\frac{Mg}{a}) + MSCMA_{min}(\frac{Mg}{a}) \\ + MSCCU_{min}(\frac{Mg}{a}) + PAL_{summax}(\frac{Mg}{a})$$

$$LIGE_{summax}(\frac{Mg}{a}) = QBRETH_{max(dm)} + SRCAG_{max}(\frac{Mg}{a}) + SRCMA_{max}(\frac{Mg}{a}) + SRCCU_{max}(\frac{Mg}{a}) + MSCMA_{max}(\frac{Mg}{a}) \\ + MSCCU_{max}(\frac{Mg}{a}) + PAL_{summax}(\frac{Mg}{a})$$

17. Biodiesel production from algae biomass

$$BIODI_{ALG_{\min/\max}(\frac{Mg}{a})} = \left( ALG_{summin/max}(\frac{Mg}{a}) \times LIP_{ALG_{\min/\max}} \right) \times LIP_{FAME}$$

18. Share of biodiesel production of biodiesel from algae biomass (BIODIALG)

$$BIODIALG_{GER_{\min/\max}(\frac{Mg}{a})} = \left( \frac{BIODI_{Alg_{\min/\max}(\frac{Mg}{a})}}{BIODI_{GERcons}} \right) \times 100$$

19. Ethanol production from suitable lignocellulosic materials (ETHLIG)

$$ETHLIG_{\min}(\frac{Mg}{a}) = \left( LIGE_{summin/max}(\frac{Mg}{a}) \times Y_{ETH_{minbeech}} \right) \times ETH_{conv}$$

$$ETHLIG_{\max}(\frac{Mg}{a}) = \left( LIGE_{summin/max}(\frac{Mg}{a}) \times Y_{ETH_{maxwheat}} \right) \times ETH_{conv}$$

20. Share of ethanol production of lignocellulosic material in comparison to national and international consumption scale (ETHLIGS)

$$ETHLIGS_{GER_{\min/\max(\frac{Mg}{a})}} = \left( \frac{ETHLIG_{\max(\frac{Mg}{a})}}{ETHP_{Ger}} \right) \times 100$$

$$ETHLIGS_{EU_{\min/\max(\frac{Mg}{a})}} = \left( \frac{PLALIG_{\min/\max(\frac{Mg}{a})}}{ETHP_{EU}} \right) \times 100$$

$$ETHLIGS_{EU_{\min/\max(\frac{Mg}{a})}} = \left( \frac{PLALIG_{\min/\max(\frac{Mg}{a})}}{ETHP_{World}} \right) \times 100$$

Equations for Driver 18

21. Land consumption according to animals

$$\sum FoDAN_{(di;ca;pi;po2016)(ha)} = \left( (FC_{di;ca;pi;po2016}) \div 100 \right) \times FoD_{2017(ha)}$$

22. Reduced land consumption due to 25 % reduction of diary and meat products

$$\sum RLaC_{(di;ca;pi;porr25)(ha)} = FoDAN_{(di;ca;pi;po2016)(ha)} \times \left( (100 - AN_{di;ca;pi;porr25}) \div 100 \right)$$

23. Reduced land consumption due reduced meat consumption of 30 kghead per years

$$\sum RLaC_{(di;ca;pi;porr30k)(ha)} = FoDAN_{(di;ca;pi;po2016)(ha)} \times \left( (100 - AN_{di;ca;pi;porr25}) \div 100 \right)$$

24. Land gaining through 25% reduction of diary and meat products

$$ARG_{rr25} = \sum FoDAN_{(di;ca;pi;po2016)(ha)} - \sum RLaC_{(di;ca;pi;porr25)(ha)}$$

25. Land gaining through reduced meat consumption of 30 kghead per years

$$ARG_{rr30k} = \sum FoDAN_{(di;ca;pi;po2016)(ha)} - \sum RLaC_{(di;ca;pi;porr30k)(ha)}$$
