# Supplementary material
Source: MDPI journal article supplement (https://www.mdpi.com/2071-1050/14/5/3045)
Supplement: s1 [file s1]

### S3: STEEPLE analysis

Table S1: Analysis of 21 international studies based on the STEEPLE framework

| Study_ID | Sources | Social                       | Technical                                                              | Environmental                         | Economical                                                               | Policy                                                   | Legal                                                                       | Ethical               |
|----------|---------|------------------------------|------------------------------------------------------------------------|---------------------------------------|--------------------------------------------------------------------------|----------------------------------------------------------|-----------------------------------------------------------------------------|-----------------------|
| S1       | [40]    | Population development       | Digitisation                                                           | Organic farming                       | Income and economic growth                                               | Regulations necessary in agriculture and forestry sector |                                                                             | Food security         |
|          |         | Wealth/Income                | Advanced technologies (PtX, digitisation, biotechnologies)             | Land/Soil                             | International trade                                                      |                                                          |                                                                             | Food losses           |
|          |         | Domestic employments         | Agriculture yield increase                                             |                                       | Reduction of yields in agricultural sector                               |                                                          |                                                                             |                       |
|          |         | Knowledge                    | Chemicals                                                              |                                       | Reduction of agricultural land                                           |                                                          |                                                                             |                       |
|          |         |                              | Land                                                                   |                                       | Knowledge                                                                |                                                          |                                                                             |                       |
|          |         |                              | Lignocellulosic/Material                                               |                                       |                                                                          |                                                          |                                                                             |                       |
| S2       | [41]    |                              | Residue and side products (wastes)                                     |                                       |                                                                          |                                                          |                                                                             |                       |
|          |         |                              |                                                                        |                                       | Competitive use                                                          |                                                          | CO <sub>2</sub> Tax                                                         |                       |
| S3       | [2]     |                              |                                                                        |                                       | Knowledge                                                                |                                                          |                                                                             |                       |
|          |         | Behavioural change           | Chemicals                                                              | Micropollutants                       | Income and economic growth                                               | CO <sub>2</sub> tax                                      | CO <sub>2</sub> tax                                                         | dietary change        |
|          |         | Wealth/Income                |                                                                        | Ecosystem Services                    | Food prices                                                              |                                                          |                                                                             | Consumption footprint |
|          |         | Domestic employments         |                                                                        | Yield development                     | Subsidies                                                                |                                                          |                                                                             | Food security         |
| S4       | [42]    | Agroecological perspective   |                                                                        | Organic farming                       | Carbon prices                                                            |                                                          |                                                                             | Food losses           |
|          |         | Public influence             | Innovations along the value chain of wood (including products)         | Climate change                        | Globalization and international economic development (oil price/exports) | Forest, environmental and nature conservation policies   | Direction of economic, competition, tax, industry and agricultural policies |                       |
|          |         | Environmental awareness      | Innovations of the exploitation of fossil resources (non-conventional) | Biomass availability/forest structure | Domestic economic development                                            | Support of the circular flow economy                     |                                                                             |                       |
|          |         | Risk and innovation attitude |                                                                        |                                       | Supply and demand for wood                                               | Support of local value chains                            |                                                                             |                       |

|    |      |                                                   |                                     |                                       |                                                                  |                                                                                           |  |                           |
|----|------|---------------------------------------------------|-------------------------------------|---------------------------------------|------------------------------------------------------------------|-------------------------------------------------------------------------------------------|--|---------------------------|
|    |      | Willingness to pay for bio-based products         |                                     |                                       | Willingness to invest in innovations                             | Regional planning and development (e.g. role of federal states and regional associations) |  |                           |
|    |      | Voting behavior (supporting sustainable politics) |                                     |                                       | Focus on short term or long term-orientated profit               |                                                                                           |  |                           |
|    |      |                                                   |                                     |                                       | Site conditions (e.g. establishment of business, infrastructure) |                                                                                           |  |                           |
| S5 | [43] | Population development                            | Bioenergy                           |                                       | Income and economic growth                                       |                                                                                           |  |                           |
|    |      | Food losses                                       |                                     |                                       | Agriculture yields constant or increase                          |                                                                                           |  |                           |
|    |      | Wealth/Income                                     |                                     |                                       | Residue and side-products (wastes)                               |                                                                                           |  |                           |
|    |      | Dietary habits                                    |                                     |                                       |                                                                  |                                                                                           |  |                           |
|    |      | Residue and side-products (wastes)                |                                     |                                       |                                                                  |                                                                                           |  |                           |
| S6 | [44] |                                                   | Chemicals                           |                                       | Chemicals                                                        |                                                                                           |  |                           |
|    |      |                                                   | Biorefineries                       |                                       |                                                                  |                                                                                           |  |                           |
| S7 | [45] |                                                   | Biofuels                            |                                       | Cost competitiveness (sec. Energy carriers and chemicals)        | CO <sub>2</sub> Tax                                                                       |  | Dietary change            |
|    |      |                                                   | Biochemicals                        |                                       |                                                                  |                                                                                           |  |                           |
|    |      |                                                   | Renewable energy share              |                                       |                                                                  |                                                                                           |  |                           |
| S8 | [46] | Food security                                     | Agriculture                         | Sustainable production in agriculture | Agriculture yield increase (sustainable intensification)         | Waste hierarchy                                                                           |  | Consumption footprint     |
|    |      | Residue and side-products (wastes)                | Reducing dependency on fossil fuels | Land use competition                  | Land                                                             | Close alignment of policy, science and industry                                           |  | resource scarcity         |
|    |      | Job creating                                      | Product design                      | Marginal lands high on biodiversity   | Residue and side-products (wastes)                               | Funding focus                                                                             |  |                           |
|    |      | Dietary habits                                    | Certification                       | Ecosystem Services                    | Knowledge                                                        |                                                                                           |  |                           |
|    |      | Regional development (site specific solutions)    |                                     |                                       | Global value chains                                              |                                                                                           |  |                           |
| S9 | [47] | Use of biobased resources                         | Circular approaches                 | Origin food                           | Origin of biobased raw materials und economic structure          |                                                                                           |  | Consumption patterns (DE) |
|    |      | Consumption patterns (DE)                         |                                     | Land use qualitative (DE)             | Economic business model                                          |                                                                                           |  |                           |

|     |      |                                                    |                                                                                                     |                                                                                                     |                                                                                                                                                             |                                          |  |                                                    |
|-----|------|----------------------------------------------------|-----------------------------------------------------------------------------------------------------|-----------------------------------------------------------------------------------------------------|-------------------------------------------------------------------------------------------------------------------------------------------------------------|------------------------------------------|--|----------------------------------------------------|
|     |      |                                                    |                                                                                                     | Biodiversity                                                                                        |                                                                                                                                                             |                                          |  |                                                    |
| S10 | [48] | Job employment                                     | Substituting by bio-based renewable resources and new valorisation of these bioresources            | Biodiversity                                                                                        | Greater variety of highly productive and adapted crops                                                                                                      | New forms of institutions and governance |  | Footprints                                         |
|     |      | Rural regeneration and revitalization              | Cascade usage                                                                                       | Ecosystem Services                                                                                  | Improved and multi-functional production system and sustainable intensification à makes marginal land more productive and better connect farmers to markets | Knowledge transfer                       |  | Reduces wastage and reduced per-capita consumption |
|     |      | Regional development (site specific solutions)     | Increase longevity and repair                                                                       | Avoiding critical products                                                                          | Residue and side-products (wastes)                                                                                                                          |                                          |  | Consumption footprint                              |
|     |      | Reduces wastage and reduced per-capita consumption | Introduction of 2 <sup>nd</sup> and 3 <sup>rd</sup> generation of bioresources (e.g. lignin, algae) | Integrated land use in multifunctional production systems which protect ecosystems and biodiversity |                                                                                                                                                             |                                          |  |                                                    |
|     |      |                                                    | Knowledge transfer                                                                                  |                                                                                                     |                                                                                                                                                             |                                          |  |                                                    |
| S11 | [49] | Population development                             | Chemicals                                                                                           | Ecosystem services                                                                                  | Chemicals                                                                                                                                                   |                                          |  | Limit population development (ethical manner)      |
|     |      | Residue and side-products (wastes)                 | Substitutional effects of renewable energies                                                        | Animal based food                                                                                   | Primary energy demand                                                                                                                                       |                                          |  |                                                    |
|     |      | Primary energy demand                              | Carbon dioxide removal                                                                              |                                                                                                     |                                                                                                                                                             |                                          |  |                                                    |
|     |      | Dietary habits                                     | Increase in agricultural productivity                                                               |                                                                                                     |                                                                                                                                                             |                                          |  |                                                    |
|     |      |                                                    | CO <sub>2</sub> usage in industry                                                                   |                                                                                                     |                                                                                                                                                             |                                          |  |                                                    |
| S12 | [50] | Population development                             | Biofuels                                                                                            | Ecosystem Services                                                                                  | Biological performance of food sector (livestock)                                                                                                           | Agriculture                              |  | Income and economic growth                         |
|     |      | Dietary habits                                     | Renewable energy share                                                                              | Perennial biomass                                                                                   | Increase in crop yields (specific)                                                                                                                          |                                          |  |                                                    |
|     |      | Wealth/Income                                      | Biomass supply                                                                                      |                                                                                                     | Cost development                                                                                                                                            |                                          |  |                                                    |
|     |      |                                                    | Biochemicals                                                                                        |                                                                                                     |                                                                                                                                                             |                                          |  |                                                    |
| S13 | [51] | Labour right and decent work                       |                                                                                                     |                                                                                                     | Employment and rural development                                                                                                                            |                                          |  | Employment and rural development                   |
|     |      | Food security                                      |                                                                                                     |                                                                                                     | Fair competition in market                                                                                                                                  |                                          |  |                                                    |

|     |      |                                                   |                                                       |                      |                                   |                                                       |                     |  |
|-----|------|---------------------------------------------------|-------------------------------------------------------|----------------------|-----------------------------------|-------------------------------------------------------|---------------------|--|
|     |      | Regional development (local community)            |                                                       |                      |                                   |                                                       |                     |  |
| S14 | [52] |                                                   | Know-How                                              | Yield development    | Business and markets              | R&D                                                   |                     |  |
|     |      |                                                   | Technological transfer                                |                      |                                   | coordination of policy frameworks in different fields |                     |  |
|     |      |                                                   | Technological performance proper for existing systems |                      |                                   |                                                       |                     |  |
|     |      |                                                   | Availability of these technologies                    |                      |                                   |                                                       |                     |  |
| S15 | [53] |                                                   | Replacing of fossil based materials                   | Yield development    | Construction                      | R&D                                                   |                     |  |
|     |      |                                                   | Construction                                          |                      | Chemicals                         | Market demand side innovation policies                |                     |  |
|     |      |                                                   | Textile                                               |                      | Textile                           | coordination of policy frameworks in different fields |                     |  |
|     |      |                                                   | Transport equipment                                   |                      | Transport equipment               |                                                       |                     |  |
| S16 | [54] | Dietary habits                                    | Digitisation                                          | Ecological footprint | Chemicals                         |                                                       |                     |  |
|     |      |                                                   | Advanced technologies                                 |                      | Lignocellulosic/Energetic         |                                                       |                     |  |
|     |      |                                                   | Biofuels                                              |                      | Lignocellulosic/Material          |                                                       |                     |  |
|     |      |                                                   | Carbon sources                                        |                      | Yield development (crop specific) |                                                       |                     |  |
|     |      |                                                   | Chemicals                                             |                      | Trade with biogenic raw materials |                                                       |                     |  |
|     |      |                                                   | Land                                                  |                      |                                   |                                                       |                     |  |
|     |      |                                                   | Lignocellulosic/Energetic                             |                      |                                   |                                                       |                     |  |
| S17 | [8]  | Population development                            | Bioenergy                                             | Yield development    | International trade               | R&D                                                   | Ban of energy crops |  |
|     |      | Dietary habits                                    | GMO                                                   | Land                 | Organic farming                   | Ban of first generation fuels                         | International trade |  |
|     |      | Acceptance of monoculture agricultural structures | Breeding                                              |                      |                                   | Ban of monocultural energy crops                      |                     |  |
|     |      |                                                   |                                                       |                      |                                   | Sustainability criteria for import of biomass         |                     |  |
| S18 | [55] | Population development                            | Digitisation                                          | Climate change       | Income and economic growth        |                                                       |                     |  |
|     |      | Urbanisation                                      | Advanced technologies                                 |                      | Competitive use                   |                                                       |                     |  |
|     |      |                                                   | Biofuels                                              |                      | Business and markets              |                                                       |                     |  |
|     |      |                                                   | Energy                                                |                      | Lignocellulosic/Material          |                                                       |                     |  |

|     |      |  |                                    |  |                                 |  |  |  |
|-----|------|--|------------------------------------|--|---------------------------------|--|--|--|
| S19 | [56] |  | Residue and side products (wastes) |  |                                 |  |  |  |
|     |      |  | Energy                             |  |                                 |  |  |  |
| S20 | [57] |  | Land                               |  | Organic farming                 |  |  |  |
|     |      |  | Perennial cropping systems         |  | Private forests                 |  |  |  |
|     |      |  | Residue and side products          |  | Land for food and feed decrease |  |  |  |
|     |      |  | Bioenergy                          |  |                                 |  |  |  |
| S21 | [58] |  | Chemicals                          |  |                                 |  |  |  |
