# Supplementary material
Source: MDPI journal article supplement (https://www.mdpi.com/2071-1050/14/5/3045)
Supplement: s1 [file s1]

S7: Data basis 2020,2030 and 2050 for exploratory quantitative analysis

Table S3: Data basis 2020,2030 and 2050 for exploratory quantitative analysis with minimum (min) and maximum (max) values

| Drivers                                                                                                      | Basis for calculation<br>(base year) | 2020 min   | 2020 max    | 2030 min   | 2030 max    | 2050 min   | 2050 max    | Unit                   | Sources          | Data base for<br>Driver (ID) |
|--------------------------------------------------------------------------------------------------------------|--------------------------------------|------------|-------------|------------|-------------|------------|-------------|------------------------|------------------|------------------------------|
| Biogenic residues and side products                                                                          |                                      | 10.216.000 | 137.550.000 | 10.216.000 | 137.550.000 | 10.216.000 | 137.550.000 | Mg <sub>dm</sub> /a    | [87]             | D1                           |
| Potential for fruit and vegetable production in llotment gardens and controlled urban agricultural practices |                                      | 0          | 0           | 2.766      | 14.306      | 5.532      | 28.612      | ha                     | [90]             | D2                           |
| Vertical farming approaches (area needed for production of whole German vegetable production)                |                                      | 0          | 0           | 0          | 0           | 50.937     | 23.332      | ha                     | [92,93]          | D2                           |
| Sum of abandoned, degraded areas, old industrial sites and marginal areas                                    |                                      | 3.420.000  | 3.470.000   | 3.989.140  | 4.533.550   | 4.372.971  | 5.371.906   | ha                     | [64,97]          | D3                           |
| Abandoned, degraded areas, old industrial sites (urban areas)                                                |                                      | 120.000    | 170.000     | 114.001    | 152.461     | 47.832     | 90.817      | ha                     | [97]             | D3                           |
| Marginal areas                                                                                               |                                      | 3.300.000  | 3.300.000   | 3.300.000  | 3.300.000   | 3.300.000  | 3.300.000   | ha                     | [64]             | D3                           |
| Areas getting free due to change restriction for energy plants                                               |                                      | 0          | 0           | 450.000    | 900.000     | 900.000    | 1.800.000   | ha                     | [44,92]          | D5                           |
| Areas getting free due to change of vegetable/fruit cultivation systems                                      |                                      | 0          | 0           | 125.139    | 181.089     | 125.139    | 181.089     | ha                     | [89–91,93]       | D5                           |
| Short rotation coppice on agricultural areas                                                                 |                                      | 33.000     | 118.800     | 158.400    | 1.758.240   | 510.000    | 5.400.000   | Mg <sub>dm</sub> /a    | [83,102,102,103] | D5, D15, D16                 |
| Short rotation coppice on marginal areas                                                                     |                                      | 0          | 0           | 11.967.419 | 48.962.337  | 13.118.912 | 58.016.582  | Mg <sub>dm</sub> /a    | [103]            | D5, D15, D16                 |
| Short rotation coppice on previously used                                                                    |                                      | 0          | 0           | 1.350.000  | 9.720.000   | 2.700.000  | 19.440.000  | Mg <sub>dm</sub> /a    | [44,103]         | D5, D15, D16                 |
| Miscanthus on agricultural areas                                                                             |                                      | 27.600     | 119.600     | 126.720    | 1.693.120   | 408.000    | 5.200.000   | Mg <sub>dm</sub> /a    | [83,104,105]     | D5, D15, D16                 |
| Miscanthus on marginal areas                                                                                 |                                      | 0          | 0           | 9.573.935  | 47.148.917  | 10.495.130 | 55.867.820  | Mg <sub>dm</sub> /a    | [83,104,105]     | D5, D15, D16                 |
| Miscanthus on agricultural areas previously used                                                             |                                      | 0          | 0           | 1.080.000  | 9.360.000   | 2.160.000  | 18.720.000  | Mg <sub>dm</sub> /a    | [44,83,104,105]  | D5, D15, D16                 |
| Paludiculture                                                                                                |                                      | 0          | 0           | 324.000    | 4.080.000   | 3.060.000  | 917.714     | Mg <sub>dm</sub> /a    | [70,108]         | D6, D15, D16                 |
| Algae                                                                                                        |                                      | 0          | 0           | 96.990     | 193.980     | 291.000    | 582.000     | Mg <sub>dm</sub> /a    | [66,100]         | D4, D16                      |
| Forest raw materials for material usage_Deciduous                                                            |                                      | -          | 28          | -          | 24          | 0.7        | 12          | Mio. m <sup>3</sup> /a | [110]            | D7                           |

|                                                                                                 |                                                                                       |            |            |            |             |            |             |            |                   |            |
|-------------------------------------------------------------------------------------------------|---------------------------------------------------------------------------------------|------------|------------|------------|-------------|------------|-------------|------------|-------------------|------------|
| Forest raw materials for material usage_Coniferous                                              |                                                                                       | 40         | 58         | 35         | 61          | 31         | 43          | Mio. m³/a  | [110]             | D7         |
| Agricultural yields                                                                             | Exemplified for total cereals (Excluding other cereals (millet, sorghum, etc.)), 2020 | 43.265     | 43.265     | 43.481     | 46.510      | 43.698     | 49.755      | in 1000 Mg | [74,115,117,118]  | D9         |
| Agricultural water usage                                                                        |                                                                                       | 300        | 300        | 270        | 263         | 240        | 225         | Mio m³/a   | [119]             | D9         |
| Agricultural N₂O emissions                                                                      |                                                                                       | 126        | 126        | 119        | 104         | 113        | 83          | in 1000 Mg | [120]             | D9         |
| Agricultural plant protection                                                                   |                                                                                       | 27.000     | 35.000     | 25.515     | 19.250      | 24.030     | 3.500       | Mg         | [121]             | D9         |
| Ecological farming (ha)                                                                         | Base Year 2019                                                                        | 1.613.834  | 1.613.834  | 2.165.823  | 2.165.823   | 3.412.087  | 3.412.087   | in ha      | [124]             | <u>D10</u> |
| Digitilisation connection rate to networks with >1000 Mbit                                      |                                                                                       | 20         | 77         | 100        | 100         | 100        | 100         | %          | [136]             | D13        |
| Plastic market demand of Germany of 2020 Food wastes                                            | 12.269.400                                                                            | 195.083    | 5.889.312  | 195.279    | 5.889.312   | 195.083    | 5.889.312   | Mg/a       | [145,146]         | D15        |
| Plastic market demand of Germany of 2020 and production potentials of lignocellulosic materials | 12.269.400                                                                            | 2.239.686  | 81.266.688 | 7.732.138  | 169.455.322 | 9.495.369  | 217.499.041 | Mg/a       | [144,145,147,148] | D15        |
| Bioethanol production 2019, and production potentials from lignocellulosic materials            | 1.187.400                                                                             | 381.990    | 29.294.878 | 2.919.197  | 76.701.881  | 3.733.711  | 102.528.437 | Mg/a       | [144,154–158]     | D16        |
| Biodiesel consumption, 2018 and production potentials from Algae                                | 2.291.700                                                                             | 0          | 0          | 23.520     | 56.448      | 70.568     | 169.362     | Mg/a       | [151,159]         | D16        |
| Population development                                                                          |                                                                                       | 82.902.000 | 82.902.000 | 78.451.000 | 83.451.000  | 74.000.000 | 84.000.000  | in Pers    | [160]             | D17        |
| Feed consumption cows/female cattle                                                             | Base year 2017                                                                        | 45.421     | 45.421     | 34.975     | 45.421      | 34.975     | 45.421      | in 1000 Mg | [84,164]          | D18        |
| Feed consumption cattle                                                                         | Base year 2017                                                                        | 30.243     | 30.243     | 24.194     | 14.001      | 24.194     | 14.001      | in 1000 Mg | [84,164]          | D18        |
| Feed consumption pigs                                                                           | Base year 2017                                                                        | 13.684     | 13.684     | 10.810     | 8.032       | 10.810     | 8.032       | in 1000 Mg | [84,164]          | D18        |
| Feed consumption poultry                                                                        | Base year 2017                                                                        | 9.314      | 9.314      | 7.079      | 4.564       | 7.079      | 4.564       | in 1000 Mg | [84,164]          | D18        |
| Feed consumption other (calves/sheep/horses)                                                    | Base year 2017                                                                        | 16.329     | 16.329     | 16.329     | 16.329      | 16.329     | 16.329      | in 1000 Mg | [84,164]          | D18        |
| Areas used for feed production for cows/female cattle                                           | Base year 2017                                                                        | 3.680      | 3.680      | 2.834      | 3.680       | 2.834      | 3.680       | in 1000 ha | [84,164]          | D18        |
| Areas used for feed production for cattle                                                       | Base year 2017                                                                        | 2.450      | 2.450      | 1.960      | 1.134       | 1.960      | 1.134       | in 1000 ha | [84,164]          | D18        |
| Areas used for feed production for pigs                                                         | Base year 2017                                                                        | 1.109      | 1.109      | 876        | 651         | 876        | 651         | in 1000 ha | [84,164]          | D18        |
| Areas used for feed production for poultry                                                      | Base year 2017                                                                        | 755        | 755        | 574        | 370         | 574        | 370         | in 1000 ha | [84,164]          | D18        |

---

|                                                                   |                |       |       |       |       |       |       |            |          |     |
|-------------------------------------------------------------------|----------------|-------|-------|-------|-------|-------|-------|------------|----------|-----|
| Areas reduced for feed production for other (calves/sheep/horses) | Base year 2017 | 1.323 | 1.323 | 1.323 | 1.323 | 1.323 | 1.323 | in 1000 ha | [84,164] | D18 |
|-------------------------------------------------------------------|----------------|-------|-------|-------|-------|-------|-------|------------|----------|-----|
