# Supplementary material
Source: MDPI journal article supplement (https://www.mdpi.com/2071-1050/14/5/3045)
Supplement: s1 [file s1]

## S5: Parameters

Table S2: Parameters and values, units used in connection to the specific sources.

| Specific driver variables                      | Description                                                                      | 1. Literature based values | Unit                 | 2. Literature based values | Unit | Sources  | Data base for Driver (ID) |
|------------------------------------------------|----------------------------------------------------------------------------------|----------------------------|----------------------|----------------------------|------|----------|---------------------------|
| <b>Biogenic residues</b>                       |                                                                                  |                            |                      |                            |      |          |                           |
| $Q_{mob(dm)}$                                  | Mobilizable potential of biogenic residues in dry matter (Baseline 2015)         | 10.216.000                 | Mg <sub>dm</sub> /a* |                            |      | [87]     | D1                        |
| $Q_{tech(dm)}$                                 | Technical potential of biogenic residues in dry matter (Baseline 2015')          | 137.550.000                | Mg <sub>dm</sub> /a  |                            |      | [87]     | D1                        |
| <b>Residues of lignocellulosic composition</b> |                                                                                  |                            |                      |                            |      |          |                           |
| $QLIG_{mob(dm)}$                               | Residues with lignocellulosic composition                                        | 9.938.000                  | Mg <sub>dm</sub> /a  |                            |      | [87]     | D15                       |
| $QLIG_{tech(dm)}$                              | Residues with lignocellulosic composition                                        | 112.632.000                | Mg <sub>dm</sub> /a  |                            |      | [87]     | D15                       |
| <b>Food wastes</b>                             |                                                                                  |                            |                      |                            |      |          |                           |
| $QFW_{mobimin(dm)}$                            | Mobilizable minimum potential of Food waste in trade + Kitchen and canteen waste | 30.000                     | Mg <sub>dm</sub> /a  |                            |      | [87]     | D15                       |
| $QFW_{mobimax(dm)}$                            | Mobilizable maximum potential of Food waste in trade + Kitchen and canteen waste | 253.000                    | Mg <sub>dm</sub> /a  |                            |      | [87]     | D15                       |
| $QFW_{techmin(dm)}$                            | Technical minimum potential of Food waste in trade + Kitchen and canteen waste   | 400.000                    | Mg <sub>dm</sub> /a  |                            |      | [87]     | D15                       |
| $QFW_{techmax(dm)}$                            | Technical maximum potential of Food waste in trade + Kitchen and canteen waste   | 902.000                    | Mg <sub>dm</sub> /a  |                            |      | [87]     | D15                       |
| <b>Urban agriculture</b>                       |                                                                                  |                            |                      |                            |      |          |                           |
| $Y_{minUA}$                                    | supply of foods for urban population                                             | 2,9                        | %                    |                            |      | [89]     | D2                        |
| $Y_{maxUA}$                                    | supply of food for urban population                                              | 15                         | %                    |                            |      | [90]     | D2                        |
| $Y_{minVF}$                                    | Potential yields of Vertical farming appliances                                  | 71                         | Mg/ha                |                            |      | [92]     | D2                        |
| $Y_{maxVF}$                                    | Potential yields of Vertical farming appliances                                  | 155                        | Mg/ha                |                            |      | [92]     | D2                        |
| <b>Urban population</b>                        |                                                                                  |                            |                      |                            |      |          |                           |
| $UP_{avg(\%)} / UP_{avg(head)}$                | Urbanisation rate Germany**                                                      | 77,3                       | %                    | 63.938.000                 | head | [91,160] | D2                        |
| $F_{cons(\frac{kg}{head})}$                    | Fruit consumption (average 2017 -2019)                                           | 69,6                       | kg <sub>head</sub>   |                            |      | [93]     | D2                        |
| $Veg_{cons(\frac{kg}{head})}$                  | Vegetable consumption (average 2017 -2019)                                       | 100,9                      | kg <sub>head</sub>   |                            |      | [93]     | D2                        |
| $F_{prod(ha)} / F_{prod(\frac{t}{a})}$         | Fruit production (average 2015 – 2019)                                           | 67.140                     | ha                   | 1.254.180                  | Mg/a | [93]     | D2                        |
| $Veg_{prod(ha)} / Veg_{prod(\frac{t}{a})}$     | Fruit production (average 2015 – 2020)                                           | 125.139                    | ha                   | 3.709.764                  | Mg/a | [93]     | D2                        |
| <b>Marginal areas</b>                          |                                                                                  |                            |                      |                            |      |          |                           |

|                           |                                                                                                                                                                                        |            |                       |  |  |            |              |
|---------------------------|----------------------------------------------------------------------------------------------------------------------------------------------------------------------------------------|------------|-----------------------|--|--|------------|--------------|
| $Ab_{min(ha)}$            | Minimum potential of abandoned, degraded areas, old industrial sites (urban areas)                                                                                                     | 120.000    | ha                    |  |  | [97,98]    | D3           |
| $Ab_{max(ha)}$            | Maximum potential of abandoned, degraded areas, old industrial sites (urban areas)                                                                                                     | 175.000    | ha                    |  |  | [97,98]    | D3           |
| $Ma_{ag(ha)}$             | All marginal areas within Germany                                                                                                                                                      | 3.300.000  | ha                    |  |  | [64]       | D3           |
| $Ma_{sum(ha)}$            | Abandoned, degraded areas, old industrial sites and marginal areas in Germany in 2050                                                                                                  | 3.420.000  | ha                    |  |  | Calculated | D3           |
| Aquatic biomass           |                                                                                                                                                                                        |            |                       |  |  |            |              |
| $Y_{minALG(dm)}$          | Potential yield of algae biomass in Germany in dry matter                                                                                                                              | 30         | Mg/ha a <sup>-1</sup> |  |  | [66,100]   | D4, D16      |
| $Y_{maxALG(dm)}$          | Potential yield of algae biomass in Germany in dry matter                                                                                                                              | 60         | Mg/ha a <sup>-1</sup> |  |  | [66,100]   | D4, D16      |
| $ALG_{(ha)}$              | Potential of algae biomass production areas in Germany (limitation of geographic conditions)                                                                                           | 9.700      | ha                    |  |  | [100]      | D4, D16      |
| $LIP_{ALG min/max}$       | Lipid content of t <sub>dm</sub> of Algae biomass                                                                                                                                      | 25 – 30    | %                     |  |  | [66]       | D16          |
| Perennial biomass         |                                                                                                                                                                                        |            |                       |  |  |            |              |
| $CU_{max(ha)}$            | Potential of short rotation coppice planted on areas that was previously in usage for energy plants (from 2023 to 2050) and shared 60/40 between Short rotation coppice and miscanthus | 1.800.000  | ha                    |  |  | [57,103]   | D5, D15, D16 |
| $Y_{minSRC(dm)}$          | Minimum potential yield of Short rotation coppice found in literature                                                                                                                  | 5          | Mg/ha a <sup>-1</sup> |  |  | [57,103]   | D5, D15, D16 |
| $Y_{maxSRC(dm)}$          | Maximum potential yield of Short rotation coppice                                                                                                                                      | 18         | Mg/ha a <sup>-1</sup> |  |  | [57,103]   | D5, D15, D16 |
| $SRC_{minAG(ha)}$         | Potential for short rotation coppice on agricultural areas in 2050                                                                                                                     | 102.000    | ha                    |  |  | [102]      | D5, D15, D16 |
| $SRC_{maxAG(ha)}$         | Potential for short rotation coppice on agricultural areas in 2050 (Share 60/40 with miscanthus based on actual establishment)                                                         | 300.000    | ha                    |  |  | [102]      | D5, D15, D16 |
| $Y_{minMSC(dm)}$          | Minimum potential yield of miscanthus                                                                                                                                                  | 6          | Mg/ha a <sup>-1</sup> |  |  | [104]      | D5, D15, D16 |
| $Y_{maxMSC(dm)}$          | Maximum potential yield of miscanthus                                                                                                                                                  | 12         | Mg/ha a <sup>-1</sup> |  |  | [105]      | D5, D15, D16 |
| $MSC_{minAG(ha)}$         | Potential for miscanthus on agricultural areas in 2050 (Share 40/60 with SRC based on actual establishment)                                                                            | 68.000     | ha                    |  |  | [84]       | D5, D15, D16 |
| $MSC_{maxAG(ha)}$         | Potential for miscanthus on agricultural areas in 2050 (Share 40/60 with SRC based on actual establishment)                                                                            | 200.000    | ha                    |  |  | [84]       | D5, D15, D16 |
| Paludiculture             |                                                                                                                                                                                        |            |                       |  |  |            |              |
| $Y_{minPAL(dm)}$          | Potential yield of paludiculture                                                                                                                                                       | 3,6        | Mg/ha a <sup>-1</sup> |  |  | [70,108]   | D6, D15, D16 |
| $Y_{maxPAL(dm)}$          | Potential yield of paludiculture                                                                                                                                                       | 20,4       | Mg/ha a <sup>-1</sup> |  |  | [70,108]   | D6, D15, D16 |
| $PAL_{max(ha)}$           | Maximum area rewetted for cultivation with paludiculture until 2050                                                                                                                    | 1.314.000  | ha                    |  |  | [70]       | D6, D15, D16 |
| Plastic production/demand |                                                                                                                                                                                        |            |                       |  |  |            |              |
| $POLD_{GER}$              | Plastic demand Germany                                                                                                                                                                 | 12.269.400 | Mg/a                  |  |  | [145]      | D15          |

|                                                   |                                                         |                       |                     |  |  |           |     |
|---------------------------------------------------|---------------------------------------------------------|-----------------------|---------------------|--|--|-----------|-----|
| $POLD_{EU}$                                       | Plastic demand Europe                                   | 50.700.000            | Mg/a                |  |  | [145]     | D15 |
| $POLP_{EU}$                                       | Plastic production Europe                               | 58.000.000            | Mg/a                |  |  | [145]     | D15 |
| $POLP_{World}$                                    | Plastic production Worldwide                            | 368.000.000           | Mg/a                |  |  | [145]     | D15 |
| PLA (food waste)                                  |                                                         |                       |                     |  |  |           |     |
| $FOP$                                             | Food waste powder conversion rate                       | 0,5                   |                     |  |  | [146]     | D15 |
| $LAC_{FOP}$                                       | Conversion food waste powder to lactide                 | 0,17                  | Mg/Mg               |  |  | [146]     | D15 |
| $PLA_{LAC}$                                       | Conversion rate from lactide to PLA                     | 0,13                  | Mg/Mg               |  |  | [146]     | D15 |
| PLA out of lignocellulosic material               |                                                         |                       |                     |  |  |           |     |
| $LACA_{LIG_{min/max}}$                            | Conversion rate Lignocellulosic material to lactic acid | 0,32 – 0,9            | Mg/Mg               |  |  | [144]     | D15 |
| $PLA_{LACA_{min/max}}$                            | Conversion rate from lactic acid to PLA                 | 0,7 – 0,8             | Mg/Mg               |  |  | [147,148] | D15 |
| Biodiesel consumption                             |                                                         |                       |                     |  |  |           |     |
| $BIODI_{GERcons}$                                 | Biodiesel consumption in Germany in the year 2018       | 2.291.700             | Mg/a                |  |  | [151]     | D16 |
| $LIP_{FAME}$                                      | Conversion rate lipid to FAME (diesel)                  | 0,97                  | %                   |  |  | [159]     | D16 |
| Ethanol consumption                               |                                                         |                       |                     |  |  |           |     |
| $ETHP_{Ger}$                                      | Bioethanol consumption in Germany (2018)                | 1.187.400             | Mg/a                |  |  | [151]     | D16 |
| $ETHP_{EU}$                                       | Bioethanol consumption in Europe (2019)                 | 435 * 107             | Mg/a                |  |  | [152]     | D16 |
| $ETHP_{World}$                                    | Bioethanol consumption in World (2019)                  | 909 * 10 <sup>8</sup> | Mg/a                |  |  | [153]     | D16 |
| Biogenic residues suitable for ethanol production |                                                         |                       |                     |  |  |           |     |
| $QBRETH_{min(dm)}$                                | Biogenic residues suitable for ethanol production       | 3.631.000             | Mg <sub>dm</sub> /a |  |  | [154]     | D16 |
| $QBRETH_{max(dm)}$                                | Biogenic residues suitable for ethanol production       | 75.450.000            | Mg <sub>dm</sub> /a |  |  | [154]     | D16 |
| Ethanol out of lignocellulosic material           |                                                         |                       |                     |  |  |           |     |
| $ETH_{conv}$                                      | Conversion rate from 1 l of Ethanol to 1 kg             | 0,79                  |                     |  |  | [155]     | D16 |
| $Y_{ETH_{min/max}}_{beech}$                       | Yield of litre from 1 tonne of dry matter beech wood    | 131 – 220             | l/Mg                |  |  | [156]     | D16 |
| $Y_{ETH_{min/max}}_{wheat}$                       | Yield of litre from 1 tonne of dry matter wheat straw   | 183 - 490             | l/Mg                |  |  | [144,157] | D16 |
| $Y_{ETH_{min/max}}_{misc}$                        | Yield of liter from 1 tonne of dry matter miscanthus    | 314 - 341             | l/Mg                |  |  | [158]     | D16 |
| Animal numbers (2016)                             |                                                         |                       |                     |  |  |           |     |
| $AN_{di2016(pc)}$                                 | Animal numbers dairy cows in 1000, Germany, 2016        | 4.218                 | pc                  |  |  | [83]      | D18 |
| $AN_{ca2016(pc)}$                                 | Animal numbers cattle in 1000 , Germany 2016            | 8.249                 | pc                  |  |  | [83]      | D18 |

|                                                                                                |                                                                                                            |         |      |  |  |              |     |
|------------------------------------------------------------------------------------------------|------------------------------------------------------------------------------------------------------------|---------|------|--|--|--------------|-----|
| $AN_{pi2016(pc)}$                                                                              | Animal numbers pigs in 1000, Germany 2016                                                                  | 22.761  | pc   |  |  | [83]         | D18 |
| $AN_{po2016(pc)}$                                                                              | Animal numbers Poultry in 1000, Germany 2016                                                               | 106.200 | pc   |  |  | [83]         | D18 |
| Reduction rate of animal numbers by 25% less dairy and meat products                           |                                                                                                            |         |      |  |  |              |     |
| $AN_{dirr25}$                                                                                  | Reduction rate for animal numbers dairy cows if 25% less dairy and meat consumption                        | 23      | %    |  |  | [83]         | D18 |
| $AN_{carr25}$                                                                                  | Reduction rate for animal numbers cattle if 25% less dairy and meat consumption                            | 20      | %    |  |  | [83]         | D18 |
| $AN_{pirr25}$                                                                                  | Reduction rate for animal numbers of pig if 25% less dairy and meat consumption                            | 21      | %    |  |  | [83]         | D18 |
| $AN_{porr25}$                                                                                  | Reduction rate for animal numbers of poultry if 25% less dairy and meat consumption                        | 24      | %    |  |  | [83]         | D18 |
| Reduction rate of animal numbers for meat consumption of 30 kg <sub>head</sub> a <sup>-1</sup> |                                                                                                            |         |      |  |  |              |     |
| $AN_{dirr30k}$                                                                                 | Reduction rate for animal numbers dairy cows for meat consumption of 30 kg <sub>head</sub> a <sup>-1</sup> | 0       | %    |  |  | Adapted [83] | D18 |
| $AN_{carr30k}$                                                                                 | Reduction rate for animal numbers cattle for meat consumption of 30 kg <sub>head</sub> a <sup>-1</sup>     | 54      | %    |  |  | Adapted [83] | D18 |
| $AN_{pirr30k}$                                                                                 | Reduction rate for animal numbers pig for meat consumption of 30 kg <sub>head</sub> a <sup>-1</sup>        | 41      | %    |  |  | Adapted [83] | D18 |
| $AN_{porr30k}$                                                                                 | Reduction rate for animal numbers poultry for meat consumption of 30 kg <sub>head</sub> a <sup>-1</sup>    | 51      | %    |  |  | Adapted [83] | D18 |
| Fodder consumption rates of domestic livestock                                                 |                                                                                                            |         |      |  |  |              |     |
| $FC_{di2016}$                                                                                  | Fodder consumption rate, dairy cows Germany 2017                                                           | 39.5    | %    |  |  | [164]        | D18 |
| $FC_{ca2016}$                                                                                  | Fodder consumption rate, cattle Germany 2017                                                               | 26.3    | %    |  |  | [164]        | D18 |
| $FC_{pi2016}$                                                                                  | Fodder consumption rate, pig Germany 2017                                                                  | 11.9    | %    |  |  | [164]        | D18 |
| $FC_{po2016}$                                                                                  | Fodder consumption rate, poultry Germany 2017                                                              | 8.1     | %    |  |  | [164]        | D18 |
| $FC_{se2016}$                                                                                  | Fodder consumption rate, some else (calves, sheep, horses) Germany 2017                                    | 14.2    | %    |  |  | [164]        | D18 |
| Land use of fodder domestic in 1000 ha and tonnes                                              |                                                                                                            |         |      |  |  |              |     |
| $FoD_{2017(t)}$                                                                                | Fodder quantities from domestic in 1000, Germany 2017                                                      | 114.991 | Mg/a |  |  | [164]        | D18 |
| $FoD_{2017(ha)}$                                                                               | Areas domestic used for fodder production in 1000, Germany 2017                                            | 9317    | ha   |  |  | [164]        | D18 |

\* dm = dry matter

\*\*Urban areas larger than 10.000 people
