# Supplementary material
Source: MDPI journal article supplement (https://www.mdpi.com/2071-1050/14/5/3045)
Supplement: s1 [file s1]

Archive with 7 entries (7 files):
- S1_Narrative analysis/20211216_Narrative analysis.xlsx
- S2_Results Narrative analysis/20211216_Results Narrativ analysis.xlsx
- S3_STEEPLE analysis/20220216_STEEPLE analysis.pdf
- S4_List of reviewed literature/20220113_Statistical Data for literature analysis 2010 to 2020.xlsx
- S5_Parameters/20220225_Parameterss.pdf
- S6_Equations/20220225_Equation.pdf
- S7_Data basis 2020,2030 and 2050/20220225_Data basis 2020,2030 and 2050 for exploratory quantitative analysiss.pdf
