# Supplementary material
Source: MDPI journal article supplement (https://www.mdpi.com/2071-1050/14/5/3045)
Supplement: s1 [file s1 › S1_Narrative analysis/20211216_Narrative analysis.xlsx]

## Sheet: Narrative_analysis_detailed
Narrative analysis German National Bioeconomy Strategy 2020		Used narrative frameworks from literature
Superordinate sections of the German National Bioeconomy Strategy 2020	Extracted statements	Bugge et al. 2016			Hausknost et al. 2017				Dietz et al. 2016
		Bio-technology vision	Bio-ressource vision	Bio-ecological vision	Sustainable capital	Eco-growth	Eco-retreat	Planned transition	TP 1: Fossil-fuel substitution	TP2: Boosting primary sector productivity	TP3: New & more efficient biomass	TP4: Low bulk & high-value application pathway
Research funding for a sustainable bioeconomy
Life-science and converging areas of science and technology		1						1				1
Key new future and emerging technologies		1			1							1
Digitisation		1										1
Availability of natural resource within ecological limits				1		1					1
Reduction of consumption of non-renewable resources as fossil fuels and mineral raw materials				1				1	1
For uncoupling economy prosperity from resource consumption effeciency and sustainable use of resources			1		1						1
Recovery of resources as recycling and reuse of byproducts, residues and waste streams			1					1			1
Coupling and cascade use in connection to cluster in economy leads to high-performance biobased economy				1	1						1
Inter and transdisciplinary reserach in natural, technical, social and ethical science			1				1
Biological knowledge as the key to the bioeconomy	Omics-technologies (enomics, epigenomics, proteomics and metabolomics)	1						1				1
	breeding for sustainable plant production are yield optimisation, optimal use of nutrients, resistance to and tolerance of flooding, heat, drought and plant diseases and pests, adaptation to soil quality, and the preservation of genetic diversity	1				1					1
	Insects, fungi, microorganisms and aquatic life forms such as algae for metabolic engeeniring and synthetic biology		1					1			1
	new materials and products with tailor-made properties (fully recyclable biopolymers, novel biopharmaceuticals to combat antibiotic resistance and environmentally compatible chemicals	1			1						1
	Articial production systems	1										1
Sum	5	4	1	0	1	1	0	2	0	0	3	2
Percent		80	20	0	20	20	0	40	0	0	60	40
Innovative biotechnological process concepts for bio-based production systems	provide biomass for downstream production processes that is accessible, treated and in line with demand		1		1						1
	biogenic residues and to convert byproducts and residue «ows into valuable products		1		1						1
	new concepts for coupled and cascade use, and to optimise biorefinery concepts		1		1							1
	waste streams that have not yet been recycled or which have an as yet unused potential value can serve as an ecologically and economically advantageous source of raw materials for industry and agriculture. This includes organic waste, municipal and industrial waste water, and industrial waste gases		1			1						1
	4	0	4	0	3	1	0	0	0	0	2	2
		0	100	0	75	25	0	0	0	0	50	50
Generate biogenic resources sustainably	Agricultural production relies on ecosystem services, and must in turn contribute to the protection of these services			1			1			1
	Through the development of appropriate sustainable cultivation and production systems, agricultural production can be adapted to respond flexibly to regional and location-specific conditions, for example, using new smart farming approaches.	1						1		1
	innovative and sustainable agricultural and forest systems that are resource-efficient, competitive and resilient in the face of changing climate and environmental conditions, while continuing to provide the necessary supply of biogenic resources		1					1		1
	novel, circular and lower input cultivation and production systems, including in organic farming		1			1				1
	(modular) high-tech production systems that work in a controlled environment with low space and energy requirements and in largely closed circulation systems	1				1				1
	5	2	2	1	0	2	1	2	0	5	0	0
		40	40	20	0	40	20	40	0	100	0	0
Converging technologies and cross-disciplinary collaboration	nanotechnology, miniaturisation, digitisation, automation and articial intelligence	1			1						1
	Digitisation for impact assessment, prediction and the targeted design of efficient and tailor-made bio-based processes	1			1						1
	2	2	0	0	2	0	0	0	0	0	2	0
		100	0	0	100	0	0	0	0	0	100	0
Limits and potential	contribution the bioeconomy seeks to make is to ensure that we remain within these limits			1				1			1
	determine the level of greenhouse gas emissions and the extent of the use of materials, energy, water and land of different qualities that are associated with certain forms of production, including how more intensive use affects biodiversity			1				1			1
	necessary instruments are currently only available in part. With the aid of research these gaps should be closed in the coming years.	1				1					1
	holistic equilibrium can only be achieved when we can either measure or estimate precisely the extent of the use of biomass over the entire life cycle, from production to reuse, and of the application of bioeconomic processes with all their outcomes and feedback effects		1					1			1
	4	1	1	2	0	1	0	3	0	0	4	0
		25	25	50	0	25	0	75	0	0	100	0
Transfer from idea to application	Agency for Breakthrough Innovations offers further support for ground-breaking ideas on their way to application, and is also open to bioeconomic innovations	1			1							1
	central element in the transfer of knowledge to application is a closer networking of the actors involved, both between research and industry and between different sectors of the economy		1		1							1
	new value creation networks		1					1				1
	product design should already take into account how a particular product can be processed or recycled at the end of its useful life.			1		1						1
	market and industry, such as raw material availability, technical requirements, regulatory challenges and cost factors, are considered at an early stage of the research and development process	1						1				1
	highly qualied experts who, in addition to their specialist knowledge, acquire during their training and studies the ability to engage in interdisciplinary and transdisciplinary work		1					1			1
	6	2	3	1	2	1	0	3	0	0	1	5
		33.3333	50	16.6667	33.3333	16.6667	0	50	0	0	16.6667	83.3333
Bioeconomy and society	expand our understanding of systemic relationships – from material cycles in individual cultivation systems through the functioning of ecosystems to planetary boundaries			1			1					1
	interactions between the technical possibilities and economic, social and ecological factors		1					1				1
	examine comprehensively the opportunities and risks associated with the development and spread of specific new technologies		1					1				1
	value of nature and of ecosystem services, access to resources, their fair distribution and sufciency are also important			1			1				1
	Technical means alone will not sufce to meet these challenges because technological innovations do not always lead to the solutions they were intended to provide		1			1					1
	Certification and labelling		1		1							1
	6	0	3	2	0	1	2	2	0	0	2	3
		0	50	33.3333	0	16.6667	33.3333	33.3333	0	0	33.3333	50
Global research collaboration	location for science, technology and innovation. An expansion and continuation of international cooperation re«ects Germany’s global responsibility.	1			1							1
	through constructive dialogue with its partners and work towards the successful implementation of the European bioeconomy strategy				1							1
	convinced that each country and region can make an individual contribution to the global bioeconomy through its own mix of raw materials, technologies, knowledge and ideas		1		1						1
	3	1	1	0	3	0	0	0	0	0	1	2
		33.3333	33.3333	0	100	0	0	0	0	0	33.3333	66.6667
Sum of building blocks	39	12	16	6	12	7	3	12	0	5	15	15
Summary for Reserach funding for a sustainable bioeconomy	48	15	19	9	15	8	4	15	1	5	19	18
In percent		31.25	39.5833	18.75	31.25	16.6667	8.33333	31.25	2.08333	10.4167	39.5833	37.5
				89.5833				87.5				89.5833
Action areas for a sustainable bioeconomy to improve the policy framework
Reducing the pressure on land	more effective redistribution of food, and reduced production of animal-based food produce in combination with a low-meat diet		1					1		1
	need to provide ecosystem services, biodiversity			1			1			1
	improved and resource-saving forms of land use		1			1				1
	measures that serve to increase resource efficiency		1			1				1
	recultivation of degraded and unused areas, and of land that is used		1			1					1
	Inner-city areas can also be used for agricultural or horticultural production (urban farming		1			1					1
	increase the productivity of areas used for agriculture and forestry in hand with conservation of biodiversity and landscape through breeding, precision farming	1			1					1
	reduce the area of land sealed for settlement and infrastructural purposes			1				1		1
	coupled and cascade use targeting an overall reduction in the use of raw materials. The use of biogenic resources that require little or no space (for example, waste and residues)		1				1				1
	9	1	6	2	1	4	2	2	0	6	3	0
		11.1111	66.6667	22.2222	11.1111	44.4444	22.2222	22.2222	0	66.6667	33.3333	0
Sustainable production and supply of biogenic raw materials	source use must take into account environmental, climate and nature protection goals, while also considering socio-economic and sustainability targets			1			1				1
	organic farming in Germany is to increase to 20 % by the year 2030		1			1				1
	specifications for fertiliser application are continuously being adapted in line with environmental requirements and the corresponding European legal foundation	1						1		1
	risks associated with the use of crop protection products in agriculture are to be reduced and animal welfare should be improved without impacting negatively on the productivity of German agriculture		1		1					1
	adapting Germany’s forests to climate change and securing the supply of raw materials		1			1				1
	adjust agriculture, forestry, sheries and aquaculture to the expected changes to the climate so as to reduce the risks facing businesses without harming the environment.		1			1				1
	6	1	4	1	1	3	1	1	0	5	1	0
		16.6667	66.6667	16.6667	16.6667	50	16.6667	16.6667	0	83.3333	16.6667	0
Establishing and developing bioeconomy supply chains and networks	innovative bio-based products, processes and services that have positive properties exceeding those of fossil-based alternatives is a key drive	1				1			1
	innovative supply chains centred around the increased use of biogenic raw materials derived from aquatic systems such as algae, cyanobacteria and aquatic plants. The use of aquatic resources will be especially strongly promoted in future in order to broaden the bioeconomy’s raw material base.		1		1						1
	supply chains must be optimised to reduce raw material consumption, protect the environment and climate by reducing the use of non-renewable raw materials, and improve their overall economic competitivenes	1			1				1
	Organisational and technical concepts are to be further developed at enterprise level and in downstream logistics chains	1			1							1
	will support the technological development of existing production processes and the testing of innovative processes.	1			1							1
	Applying the concept of resource efciency and sustainability, a cascade and coupled use of resources should be strived		1					1			1
	The use option with the highest added value should be pursued initially, and particular attention should be paid to the development of new, economically attractive byproducts that are suitable for coupled use	1			1							1
	7	5	2	0	5	1	0	1	2	0	2	3
		71.4286	28.5714	0	71.4286	14.2857	0	14.2857	28.5714	0	28.5714	42.8571
Market introduction and establishment of bio-based products, processes and services	establishment of innovative bioeconomy products and processes on the market represents a major challenge as they must compete with products that are already familiar to users and benet from established marketing channels, recognition and infrastructure	1			1				1
	the initial demand for bio-based product alternatives is frequently not sufficiently high for their production to be economically viable	1			1				1
	information and the raising of consumer awareness of the specific advantages and disadvantages of these products, certifcation and labelling		1			1			1
	Public procurement	1			1				1
	4	3	1	0	3	1	0	0	4	0	0	0
		75	25	0	75	25	0	0	100	0	0	0
Using the potential inherent in the bioeconomy for the development of rural areas	Rural areas play a central role in the bioeconomy. The expansion of the bioeconomy in Germany holds great potential in terms of value creation, jobs and the quality of life in rural areas		1			1				1
	local actors and regional administrations will be supported. One focus shall be on the local processing of biogenic raw materials to higher-quality materials suitable for subsequent processing stages		1			1				1
	2	0	2	0	0	2	0	0	0	2	0	0
		0	100	0	0	100	0	0	0	100	0	0
Exploiting digitisation for the bioeconomy	opportunities for process optimisation	1				1				1
	digital innovations in agriculture and forestry can lead to large savings in relation to resources such as soil, crop protection products, fertilisers and energy through precision farming concepts		1			1			1
	digital technologies, for example, in green professions, to improve animal welfare, protect the environment and biodiversity, and to achieve sustainable development		1					1	1
	extent to which the additional energy demand associated with greater digitisation reduces or even negates any efciency gains (rebound effect)		1			1					1
	4	1	3	0	0	3	0	1	2	1	1	0
		25	75	0	0	75	0	25	50	25	25	0
Policy coherence	potential to replace conventional processes, often the product-specific advantages or disadvantages are not taken into account in existing regulations because these were previously either not relevant or not known	1				1			1
	closer integration of policies and strategies, particularly those applying to the areas in which bio-based materials are produced or processed. This includes agriculture, forestry and sheries policies, as well as regulations in the areas of environment, construction, energy, biodiversity, waste management, resource efciency and sustainable finance		1					1			1
	exchange between stakeholders at various administrative levels (EU, federal, state) should be strengthened, and also with stakeholders and experts from individual sectors of the bioeconomy and representatives of environmental and nature conservatio		1				1				1
	biomass flows and the various uses should also be evaluated and prioritised.		1			1						1
	4	1	3	0	0	2	1	1	1	0	2	1
	36	25	75	0	0	50	25	25	25	0	50	25
Summary for Reserach funding for a sustainable bioeconomy	36	12	21	3	10	16	4	6	9	14	9	4
in percent		33.3333	58.3333	8.33333	27.7778	44.4444	11.1111	16.6667	25	38.8889	25	11.1111
Overarching instruments
Establishment of an advisory body with broad participation of society	include experts from science and industry, as well as representatives of thematically relevant civil society organisations			1				1			1
	particular attention to any conflicts that may arise in relation to the achievement of the sustainability goals linked to the bioeconomy			1				1			1
	proposals and recommendations for the plan for the implementation of the National Bioeconomy Strategy. This plan shall be drafted in a participatory process, and will be updated throughout the term of the strategy			1				1			1
	3	0	0	3	0	0	0	3	0	0	3	0
		0	0	100	0	0	0	100	0	0	100	0
Cooperation between the Federal Government and the federal states	These strategies address the specific challenges on the ground and seek to exploit the opportunities offered by the bioeconomy for both rural and urban areas		1			1					1
	clusters, competence centres and model regions that have been set up on the theme of bioeconomy		1			1					1
	2	0	2	0	0	2	0	0	0	0	2	0
		0	100	0	0	100	0	0	0	0	100	0
European and international cooperation	bioeconomies differ on the basis of the prevailing climate and geographic conditions, and the specic biological diversity		1				1				1
	associated conflicts in an international context in order to better network with stakeholders, to exchange knowledge about measures and strategies, and to advance the establishment of a sustainable bioeconomy with strategically important partners			1				1			1
	promote a sustainable bioeconomy, to resolve the associated conflicts between goals and to clarify the opportunities in terms of climate, environmental and resource protection			1			1				1
	3	0	1	2	0	0	2	1	0	0	3	0
		0	33.3333	66.6667	0	0	66.6667	33.3333	0	0	100	0
Communication und dialogue	Demographic change and global economic growth are leading to an increase in the demand for the limited land and biomass available		1			1						1
	The world population needs healthy and safe food, energy and materials, jobs, housing, and infrastructure for mobility. Through their decisions, consumers exert an influence over how these needs are met, which foods are consumed, which forms of energy are used in households, and which products are bought			1			1				1
	It is important to exchange ideas with all interested groups in society – both with the pioneers and advocates of the bioeconomy and with those who are critical of various aspects of the bioeconomy			1				1			1
	3	0	1	2	0	1	1	1	0	0	2	1
		0	33.3333	66.6667	0	33.3333	33.3333	33.3333	0	0	66.6667	33.3333
Qualifications and skilled personnel	Specialists with interdisciplinary expertise at the interfaces between sustainability, production processes, markets and consumption are needed. They are the prerequisite for innovation and growth	1			1					1
	focus should be placed on the use of digital technologies in breeding and in agriculture and forestry	1			1					1
	Training, continuing education and advisory services for sustainable production, new technologies and digital applications are extremely important for specialists and managers in the agricultural sector	1			1					1
	education for sustainable development, people acquire the skills and capacities needed to shape and promote sustainable development in our society			1			1				1
	4	3	0	1	3	0	1	0	0	3	1	0
		75	0	25	75	0	25	0	0	75	25	0
Bioeconomy monitoring	sustainable development and climate protection, as well as to sustainable value creation in industry, to the strengthening of rural areas and to the conservation of biological diversity		1				1			1
	The corresponding indicator system will be assessed for its relevance and further developed in cooperation with experts from all areas of society			1				1			1
	2	0	1	1	0	0	1	1	0	1	1	0
	17	0	50	50	0	0	50	50	0	50	50	0
Summary for Reserach funding for a sustainable bioeconomy	17	3	5	9	3	3	5	6	0	4	12	1
in percent		17.6471	29.4118	52.9412	17.6471	17.6471	29.4118	35.2941	0	23.5294	70.5882	8.33333
Sum of reviewed aspects	92
Share of Research funding a sustainable bioeconomy	42.3913
Share of Areas of action to improve the framework for a sustainable bioeconomy	39.1304
Share of Overarching instruments	18.4783
References
Bugge, M.; Hansen, T.; Klitkou, A. What Is the Bioeconomy?: A Review of the Literature. Sustainability 2016, 8, 691, doi:10.3390/su8070691.
Hausknost, D.; Schriefl, E.; Lauk, C.; Kalt, G. A Transition to Which Bioeconomy?: An Exploration of Diverging Techno-Political Choices. Sustainability 2017, 9, 669, doi:10.3390/su9040669.
Dietz, T.; Börner, J.; Förster, J.; Braun, J. von. Governance of the Bioeconomy: A Global Comparative Study of National Bioeconomy Strategies. Sustainability 2018, 10, 3190, doi:10.3390/su10093190.
