# Supplementary material
Source: MDPI journal article supplement (https://www.mdpi.com/2071-1050/14/5/3045)
Supplement: s1 [file s1 › S2_Results Narrative analysis/20211216_Results Narrativ analysis.xlsx]

## Sheet: Results_Calc
Sources	Bugge et al. 2016			Hausknost et al. 2017				Dietz et al. 2018
Key aspects of national bioeconomy strategy and narratives	Bio-technology vision	Bio-ressource vision	Bio-ecological vision	Sustai- nable capital	Eco-growth	Eco-retreat	Planned transition	TP 1: Fossil-fuel substitution	TP2: Boosting primary sector productivity	TP3: New & more efficient biomass	TP4: Low bulk & high-value application pathway
Research funding a sustainable bioeconomy
1 Biological knowledge as the key to the bioeconomy	X						X			X	X
2 Innovative biotechnological process concepts for bio-based production systems		X		X						X	X
3 Generate biogenic resources sustainbly	X	X			X		X		X
4 Converging technologies and cross-disciplinary collaboration	X			X						X
5 Limits and potential			X				X			X
6 Transfer from idea to application	X	X		X			X				X
7 Bioeconomy and society		X	X			X	X			X	X
8 Global research collaboration	X	X		X						X	X
Sum	5	5	2	4	1	1	5	0	1	6	5
Weighting relating share to all aspects	2.11957	2.11957	0.847826	1.69565	0.423913	0.423913	2.11957	0	0.423913	2.54348	2.11957
Areas of action to improve the framework for a sustainable bioeconomy
1 Reducing the pressure on land		X			X				X	X
2 Sustainable production and supply of biogenic raw materials		X			X				X
3 Establishing and developing bioeconomy supply chains and networks	X			X							X
4 Market introduction and establishment of bio-based products, processes and services	X			X				X
5 Using the potential inherent in the bioeconomy for the development of rural areas		X			X				X
6 Exploiting digitisation for the bioeconomy		X			X			X
7 Policy coherence		X			X					X
Sum	2	5	0	2	5	0	0	2	3	2	1
Weighting relating share to all aspects	0.782609	1.95652	0	0.782609	1.95652	0	0	0.782609	1.17391	0.782609	0.391304
Overarching instruments
1 Establishment of an advisory body with broad participation of society			X				X			X
2 Cooperation between the Federal Government and the federal states		X			X					X
3 European and international cooperation		X	X			X				X
4 Communication and dialogue		X	X		X	X	X			X	X
5 Qualifications and skilled personnel	X			X					X
6 Bioeconomy monitoring		X	X			X	X		X	X
Sum	1	4	4	1	2	3	3	0	2	5	1
Weighting relating share to all aspects	0.184783	0.73913	0.73913	0.184783	0.369565	0.554348	0.554348	0	0.369565	0.923913	0.184783
Identified narrative of the bioeconomy strategy	3.08696	4.81522	1.58696	2.66304	2.75	0.978261	2.67391	0.782609	1.96739	4.25	2.69565
* Sorted into specific narrative if detailed reviewed of the building blocks sorted more than 30 % to one narrative
**
Sum of reviewed aspects	92
Share of Research funding a sustainable bioeconomy	0.423913
Share of Areas of action to improve the framework for a sustainable bioeconomy	0.391304
Share of Overarching instruments	0.184783
References
Bugge, M.; Hansen, T.; Klitkou, A. What Is the Bioeconomy?: A Review of the Literature. Sustainability 2016, 8, 691, doi:10.3390/su8070691.
Hausknost, D.; Schriefl, E.; Lauk, C.; Kalt, G. A Transition to Which Bioeconomy?: An Exploration of Diverging Techno-Political Choices. Sustainability 2017, 9, 669, doi:10.3390/su9040669.
Dietz, T.; Börner, J.; Förster, J.; Braun, J. von. Governance of the Bioeconomy: A Global Comparative Study of National Bioeconomy Strategies. Sustainability 2018, 10, 3190, doi:10.3390/su10093190.

## Sheet: Results_Overview
Evaluated narrative of bioeconomy strategy 2020
Sources	Bugge et al. 2016			Hausknost et al. 2017				Dietz et al. 2018
Superordinate sections	Bio-technology vision	Bio-ressource vision	Bio-ecological vision	Sustainable capital	Eco-growth	Eco-retreat	Planned transition	TP 1: Fossil-fuel substitution	TP2: Boosting primary sector productivity	TP3: New & more efficient biomass	TP4: Low bulk & high-value application pathway
Research funding a sustainable bioeconomy
1 Biological knowledge as the key to the bioeconomy	X						X			X	X
2 Innovative biotechnological process concepts for bio-based production systems		X		X						X	X
3 Generate biogenic resources sustainbly	X	X			X		X		X
4 Converging technologies and cross-disciplinary collaboration	X			X						X
5 Limits and potential			X				X			X
6 Transfer from idea to application	X	X		X			X				X
7 Bioeconomy and society		X	X			X	X			X	X
8 Global research collaboration	X	X		X						X	X
Areas of action to improve the framework for a sustainable bioeconomy
1 Reducing the pressure on land		X			X				X	X
2 Sustainable production and supply of biogenic raw materials		X			X				X
3 Establishing and developing bioeconomy supply chains and networks	X			X							X
4 Market introduction and establishment of bio-based products, processes and services	X			X				X
5 Using the potential inherent in the bioeconomy for the development of rural areas		X			X				X
6 Exploiting digitisation for the bioeconomy		X			X			X
7 Policy coherence		X			X					X
Overarching instruments
1 Establishment of an advisory body with broad participation of society			X				X			X
2 Cooperation between the Federal Government and the federal states		X			X					X
3 European and international cooperation		X	X			X				X
4 Communication and dialogue		X	X		X	X	X			X	X
5 Qualifications and skilled personnel	X			X					X
6 Bioeconomy monitoring		X	X			X	X		X	X
Identified narrative of the bioeconomy strategy	3.08696	4.81522	1.58696	2.66304	2.75	0.978261	2.67391	0.782609	1.96739	4.25	2.69565
* Sorted into specific narrative if detailed reviewed of the building blocks sorted more than 30 % to one narrative
**
Sum of reviewed aspects	92
Share of Research funding a sustainable bioeconomy	0.423913
Share of Areas of action to improve the framework for a sustainable bioeconomy	0.391304
Share of Overarching instruments	0.184783
