# Supplementary material
Source: MDPI journal article supplement (https://www.mdpi.com/2071-1050/14/5/3045)
Supplement: s1 [file s1 › S4_List of reviewed literature/20220113_Statistical Data for literature analysis 2010 to 2020.xlsx]

## Sheet: All_reviewed literature
ID	Source	Literature integrated	Reviewed with DOI	University publication	Proceedings	Databases/Statistical Office	Books	Project Reports/Discussion Paper	Webpage
1	DBFZ Deutsches Biomasseforschungszentrum gemeinnützige GmbH. DBFZ Webapp | Rohstoffdatenbank / DBFZ Webapp | Raw Materials Database. Available online: https://webapp.dbfz.de/resource-database/?lang=de (accessed on 15 April 2021).					1
2	Brosowski, A.; Bill, R.; Thrän, D. Temporal and spatial availability of cereal straw in Germany—Case study: Biomethane for the transport sector. Energy, Sustainability and Society 2020, 10, 1712, doi:10.1186/s13705-020-00274-1.		1
3	Krause, T.; Pohl, M.; Klemm, M.; Wirth, B.; Gröngröft, A.; Müller-Langer, F.; Hartmann, I.; Radtke, K.S.; Thrän, D.; Brosowski, A. Nationales Monitoring biogener Reststoffe, Nebenprodukte und Abfälle in Deutschland Teil 2 / National monitoring of biogenic residues, by-products and wastes in Germany Part 2: Rohstoffeigenschaften und Konversionsfaktoren / Feedstock properties and conversion factors…		1
4	Andreola, F.; Lancellotti, I.; Manfredini, T.; Barbieri, L. The circular economy of agro and post‐consumer residues as raw materials for sustainable ceramics. Int J Appl Ceram Technol 2019, 17, 22–31, doi:10.1111/ijac.13396.		1
5	Tsui, T.-H.; Wong, J.W.C. A critical review: Emerging bioeconomy and waste-to-energy technologies for sustainable municipal solid waste management. Waste Dispos. Sustain. Energy 2019, 1, 151–167, doi:10.1007/s42768-019-00013-z.		1
6	Brosowski, A.; Thrän, D.; Mantau, U.; Mahro, B.; Erdmann, G.; Adler, P.; Stinner, W.; Reinhold, G.; Hering, T.; Blanke, C. A review of biomass potential and current utilisation – Status quo for 93 biogenic wastes and residues in Germany. Biomass and Bioenergy 2016, 95, 257–272, doi:10.1016/j.biombioe.2016.10.017.		1
7	Nelles, M.; Grünes, J.; Morscheck, G. Waste Management in Germany – Development to a Sustainable Circular Economy? Procedia Environmental Sciences 2016, 35, 6–14, doi:10.1016/j.proenv.2016.07.001.		1
8	Brosowski, A.; Krause, T.; Mantau, U.; Mahro, B.; Noke, A.; Richter, F.; Raussen, T.; Bischof, R.; Hering, T.; Blanke, C.; et al. Arbeitsgruppe Biomassereststoffmonitoring (AG BioRestMon) / Working Group on Biomass Residue Monitoring (AG BioRestMon): Schlussbericht / Final Report; Deutsches Biomasseforschungszentrum gGmbH, Ed., Leipzig, 2019.							1
9	Krause, T.; Mantau, U.; Mahro, B.; Noke, A.; Richter, F.; Raussen, T.; Bischof, R.; Hering, T.; Thrän, D.; Brosowski, A. Nationales Monitoring biogener Reststoffe, Nebenprodukte und Abfälle in Deutschland Teil 1 / National monitoring of biogenic residues, by-products and waste in Germany Part 1: Basisdaten zu Biomassepotenzialen / Basic data on biomass potentials. Open Agrar Repositorium 2020, do…		1
10	Brosowski, A.; Krause, T.; Mantau, U.; Mahro, B.; Noke, A.; Richter, F.; Raussen, T.; Bischof, R.; Hering, T.; Blanke, C.; et al. How to measure the impact of biogenic residues, wastes and by-products: Development of a national resource monitoring based on the example of Germany. Biomass and Bioenergy 2019, 127, 105275, doi:10.1016/j.biombioe.2019.105275		1
11	Bundesanstalt für Landwirtschaft und Ernährung (BMEL); Federal Agency for Agriculture and Food (BMEL). Obst, Gemüse, Zitrusfrüchte, Schalen- und Trockenobst / Fruit, vegetables, citrus fruits, nuts and dried fruit. Available online: https://www.bmel-statistik.de/ernaehrung-fischerei/versorgungsbilanzen/obst-gemuese-zitrusfruechte-schalen-und-trockenobst/ (accessed on 2 December 2021).					1
12	Dietl, A. Wie Städte von urbaner Landwirtschaft profitieren können: eine Typologie, Nachhaltigkeitsanalyse und Ökobilanzierung gängiger urbaner Anbauformen, mit Fallbeispielen aus Wien / How cities can benefit from urban agriculture: a typology, sustainability analysis and life cycle assessment of common urban farming practices, with case studies from Vienna; Social Ecology Working Paper No. 186,…							1
13	Edmondson, J.L.; Cunningham, H.; Densley Tingley, D.O.; Dobson, M.C.; Grafius, D.R.; Leake, J.R.; McHugh, N.; Nickles, J.; Phoenix, G.K.; Ryan, A.J.; et al. The hidden potential of urban horticulture. Nature Food 2020, 1, 155–159, doi:10.1038/s43016-020-0045-6.		1
14	Peña, A.; Rovira-Val, M.R. A longitudinal literature review of life cycle costing applied to urban agriculture. Int J Life Cycle Assess 2020, 25, 1418–1435, doi:10.1007/s11367-020-01768-y.		1
15	Pulighe, G.; Lupia, F. Food First: COVID-19 Outbreak and Cities Lockdown a Booster for a Wider Vision on Urban Agriculture. Sustainability 2020, 12, 5012, doi:10.3390/su12125012.		1
16	Skar, S.L.G.; Pineda-Martos, R.; Timpe, A.; Pölling, B.; Bohn, K.; Külvik, M.; Delgado, C.; Pedras, C.M.G.; Paço, T.A.; Ćujić, M.; et al. Urban agriculture as a keystone contribution towards securing sustainable and healthy development for cities in the future. Blue-Green Systems 2020, 2, 1–27, doi:10.2166/bgs.2019.931.		1
17	Armanda, D.T.; Guinée, J.B.; Tukker, A. The second green revolution: Innovative urban agriculture's contribution to food security and sustainability – A review. Global Food Security 2019, 22, 13–24, doi:10.1016/j.gfs.2019.08.002.		1
18	McDougall, R.; Kristiansen, P.; Rader, R. Small-scale urban agriculture results in high yields but requires judicious management of inputs to achieve sustainability. Proc. Natl. Acad. Sci. U. S. A. 2019, 116, 129–134, doi:10.1073/pnas.1809707115.		1
19	Scharf, N.; Wachtel, T.; Reddy, S.; Säumel, I. Urban Commons for the Edible City—First Insights for Future Sustainable Urban Food Systems from Berlin, Germany. Sustainability 2019, 11, 966, doi:10.3390/su11040966.		1
20	Winkler, B.; Maier, A.; Lewandowski, I. Urban Gardening in Germany: Cultivating a Sustainable Lifestyle for the Societal Transition to a Bioeconomy. Sustainability 2019, 11, 801, doi:10.3390/su11030801.		1
21	Hoops, G.P.; Olshansky, H.P.; Tavares, J.; Rosen, R. Copenhagen's Case for Urban Farming: A Feasibility Study; Worcester Polytechnic Institute, Ed., 2018 (accessed on 9 November 2020).			1
22	Padilla, M.; Mok, S.; Raj, H.; Latypov, V.; Bescansa, M. Urban farming in the city of tomorrow: Assessing the global landscape on urban food and resource production with the focus on indoor plant and mircoalgae cultivation; Frauenhofer Institute for industrial engineering IAO, Ed., Stuttgart, 2018. Available online: http://publica.fraunhofer.de/dokumente/N-506944.html (accessed on 30 November 202…							1
23	Petit-Boix, A.; Apul, D. From Cascade to Bottom-Up Ecosystem Services Model: How Does Social Cohesion Emerge from Urban Agriculture? Sustainability 2018, 10, 998, doi:10.3390/su10040998.		1
24	Boyer, D.; Ramaswami, A. What Is the Contribution of City-Scale Actions to the Overall Food System's Environmental Impacts?: Assessing Water, Greenhouse Gas, and Land Impacts of Future Urban Food Scenarios. Environ. Sci. Technol. 2017, 51, 12035–12045, doi:10.1021/acs.est.7b03176.		1
25	Brandt, M.; Gärtner, S.; Meyer, K. Urbane Produktion: Ein Versuch einer Begriffsdefinition / Urban production: an attempt to define the term; Institut Arbeit und Technik (IAT) / Institute for Work and Technology (IAT), Ed.; Forschung Aktuell No. 08/2017, Gelsenkirchen, 2017. Available online: http://nbn-resolving.de/urn:nbn:de:0176-201708014 (accessed on 9 November 2020).							1
26	Parece, T.E.; Campbell, J.B. Assessing Urban Community Gardens’ Impact on Net Primary Production using NDVI. Urban agric. region. food syst. 2017, 2, 1–17, doi:10.2134/urbanag2016.07.0004.		1
27	Pölling, B.; Prados, M.-J.; Torquati, B.M.; Giacchè, G.; Recasens, X.; Paffarini, C.; Alfranca, O.; Lorleberg, W. Business models in urban farming: A comparative analysis of case studies from Spain, Italy and Germany. Moravian Geographical Reports 2017, 25, 166–180, doi:10.1515/mgr-2017-0015.		1
28	Pölling, B. Comparison of Farm Structures, Success Factors, Obstacles, Clients’ Expectations and Policy Wishes of Urban Farming’s Main Business Models in North Rhine-Westphalia, Germany. Sustainability 2016, 8, 446, doi:10.3390/su8050446.		1
29	Schmidt, D. Die Rolle der urbanen Landwirtschaft in der Stadtentwicklung / The role of urban agriculture in urban development: Übersicht und Umgang mit neuen Formen anhand von Fallbeispielen / Overview and handling of new forms based on case studies. Masterarbeit; Technische Universität Dresden / Dresden University of Technology, Dresden, 2016.			1
30	McClintock, N.; Cooper, J.; Khandeshi, S. Assessing the potential contribution of vacant land to urban vegetable production and consumption in Oakland, California. Landscape and Urban Planning 2013, 111, 46–58, doi:10.1016/j.landurbplan.2012.12.009.		1
31	Schulz, K.; Weith, T.; Bokelmann, W.; Petzke, N. Urbane Landwirtschaft und „Green Production“ als Teil eines nachhaltigen Landmanagements / Urban agriculture and green production as part of sustainable land management; Leibniz‐Zentrum für Agrarlandschaftsforschung (ZALF) e.V. / Leibniz Centre for Agricultural Landscape Research (ZALF) e.V., Ed.; Diskussionspapies No. 6, Müncheberg, 2013.							1
32	Fox-Kämper, R.; Lelong, B.; Sondermann, M. Urbane Garten als Teil grüner Infrastrukturen / Urban gardens as part of green infrastructures. Raumplanung / Spatial planning 2015, 180.		1
33	Ehrmann, A. On the Possible Use of Textile Fabrics for Vertical Farming. TEK 2019, 62, 34–41, doi:10.14502/Tekstilec2019.62.34-41.		1
34	Specht, K.; Zoll, F.; Schümann, H.; Bela, J.; Kachel, J.; Robischon, M. How Will We Eat and Produce in the Cities of the Future?: From Edible Insects to Vertical Farming—A Study on the Perception and Acceptability of New Approaches. Sustainability 2019, 11, 4315, doi:10.3390/su11164315.		1
35	Deutsches Zentrum für Luft- und Raumfahrt e.V. (DLR). Vertical Farm 2.0: Designing an Economically Feasible Vertical Farm – A combined European Endeavor for Sustainable Urban Agriculture, Bremen, 2015.							1
36	Adenaeuer, L.; Banerjee, C. Up, Up and Away!: The Economics of Vertical Farming. Journal of Agriculture Studies 2014, 2, 40–60, doi:10.5296/jas.v2i1.4526.		1
37	German Federal Government. Future City: Urbane Landwirtschaft / Future City: Urban Agriculture; German Federal Government, Ed., 2019.							1
38	Association for Vertical Farming. Controlled Agriculture & Ecosystem Economies, 2017.							1
39	Al-Kodmany, K. The Vertical Farm: A Review of Developments and Implications for the Vertical City // The Vertical Farm: A Review of Developments and Implications for the Vertical City. Buildings 2018, 8, 24, doi:10.3390/buildings8020024.		1
40	van Hemelryck, S.; Adibi, N.; Roels, S.; Voorend, W. Life Cycle Assessment of Vertical Farming: Application for Basil Production in Colruyt Group Prototype Farm; 12th International Conference on Life Cycle Assessment of Food 2020 (LCA Food 2020) “Towards Sustainable Agri-Food Systems”, Berlin, 2020.				1
41	Martin, M.; Molin, E. Environmental Assessment of an Urban Vertical Hydroponic Farming System in Sweden. Sustainability 2019, 11, 4124, doi:10.3390/su11154124.		1
42	Hallikainen, E. Life Cycle Assessment on Vertical Farming. Master of Science; School of Engineering, Helsinki, 2018.			1
43	Sanyé-Mengual, E.; Oliver-Solà, J.; Montero, J.I.; Rieradevall, J. An environmental and economic life cycle assessment of Rooftop Greenhouse (RTG) implementation in Barcelona, Spain. // An environmental and economic life cycle assessment of rooftop greenhouse (RTG) implementation in Barcelona, Spain. Assessing new forms of urban agriculture from the greenhouse structure to the final product level…		1
44	Endreny, T.A. Strategically growing the urban forest will improve our world. Nat. Commun. 2018, 9, 1160, doi:10.1038/s41467-018-03622-0.		1
45	Pütz, M.; Schmid, S.; Bernasconi, A.; Wolf, B. Urban Forestry: Definition, Trends und Folgerungen für die Waldakteure in der Schweiz / Definition, trends and implications for forest actors in Switzerland. Schweizerische Zeitschrift fur Forstwesen 2015, 166, 230–237, doi:10.3188/szf.2015.0230.		1
46	Walsh, A.J. Potential Urban Forest Carbon Sequestration and Storage Capacities in Burnside Industrial Park, Nova Scotia. Master of Environmental Studies; Dalhousie University, Halifax, Nova Scotia, 2012.			1
47	Mehhdi, R.; Johari, M.Y.M.; Afshin, S. Terminology of Urban Open and Green Spaces: Conference Paper · November 2017 2017.				1
48	Cvejić, R.; Eler, K.; Pintar, M.; (UL, Š.Ž.; Slovenia); Haase, D.; Kabisch, N.; Strohbach, M. A Typology of Urban Green Spaces, Eco-Sysem services provisioning services and demands: Report: D3.1. GREEN SURGE project 2015.		1
49	Brasseur, G., Jacob, D., Schuck-Zöller, S. Klimawandel in Deutschland / Climate Change in Germany: Entwicklung, Folgen, Risiken und Perspektiven / Development, Consequences, Risks and Perspectives; Springer Spektrum: Berlin, 2017, ISBN 978-3-662-50397-3, doi:10.1007/978-3-662-50397-3.		1
50	Umweltbundesamt (UBA) / Federal Environment Agency. Daten zur Umwelt - Umweltmonitor 2020 / Environmental data - Environmental Monitor 2020; Dessau-Roßlau, 2021.					1
51	Statistisches Bundesamt (Destatis) / Federal Statistical Office (Destatis). Bevölkerung im Wandel: Annahmen und Ergebnisse der 14. koordinierten Bevölkerungsvorausberechnung / Population in Transition: Assumptions and Results of the 14th Coordinated Population Projection, Wiesbaden, 2019.					1
52	Statista Inc. Germany: Urbanization from 2010 to 2020. Available online: https://www.statista.com/statistics/455825/urbanization-in-germany/ (accessed on 2 December 2021).					1
53	Gerwin, W.; Repmann, F.; Galatsidas, S.; Vlachaki, D.; Gounaris, N.; Baumgarten, W.; Volkmann, C.; Keramitzis, D.; Kiourtsis, F.; Freese, D. Assessment and quantification of marginal lands for biomass production in Europe using soil-quality indicators. SOIL 2018, 4, 267–290, doi:10.5194/soil-4-267-2018.		1
54	Krieg, R. Nachhaltige Biomasse von marginalen Flächen / Sustainable biomass from marginal land. Available online: https://herd-und-hof.de/landwirtschaft-/nachhaltige-biomasse-von-marginalen-flaechen.html (accessed on 29 April 2021).								1
55	Soil Health and Intensification of Agroecosytems; Elsevier, 2017, ISBN 9780128053171.						1
56	Hendrickson, J.; Sanderson, M. Perennial-Based Agricultural Systems and Livestock Impact on Soil and Ecological Services. Soil Health and Intensification of Agroecosytems; Elsevier, 2017; pp 151–171, ISBN 9780128053171.						1
57	Alois Heißhuber, Wolfgang Haber, Christine Krämer. Umweltprobleme der Landwirtschaft / Environmental problems of agriculture; Umweltbundesamt (UBA) / Federal Environment Agency, Ed.; Texte No. 28/2015, Dessau-Roßlau, 2015.							1
58	Kang, S.; Post, W.M.; Nichols, J.A.; Wang, D.; West, T.O.; Bandaru, V.; Izaurralde, R.C. Marginal Lands: Concept, Assessment and Management. Journal of Agricultural Science 2013, 5, doi:10.5539/jas.v5n5p129.		1
59	Shahid, S.A.; Al-Shankiti, A. Sustainable food production in marginal lands—Case of GDLA member countries. International Soil and Water Conservation Research 2013, 1, 24–38, doi:10.1016/S2095-6339(15)30047-2.		1
60	Farwick, J.; Berg, E. Aufrechterhaltung einer flächendeckenden Landbewirtschaftung in Nordrhein-Westfalen bei zunehmender Entkopplung / Maintaining comprehensive land management in North Rhine-Westphalia with increasing decoupling;; Landwirtschaftliche Fakultät der Universität Bonn, Ed.; Schriftenreihe des Lehr- und Forschungsschwerpunktes USL, No. 165, 2011.							1
61	Tilman, D.; Hill, J.; Lehman, C. Carbon-negative biofuels from low-input high-diversity grassland biomass. Science 2006, 314, 1598–1600, doi:10.1126/science.1133306.		1
62	Ivanina, V. Sustainable exploitation of biomass for bioenergyfrom marginal lands in Europe: Report of general understanding of MagL, 2016.							1
63	Pancaldi, F.; Trindade, L.M. Marginal Lands to Grow Novel Bio-Based Crops: A Plant Breeding Perspective. Front. Plant Sci. 2020, 11, 227, doi:10.3389/fpls.2020.00227.		1
64	Umweltbundesamt (UBA) / Federal Environment Agency. Flächenrecycling und Innenentwicklung / Land recycling and inner development. Available online: https://www.umweltbundesamt.de/themen/boden-landwirtschaft/flaechensparen-boeden-landschaften-erhalten/flaechenrecycling-innenentwicklung#brachen-nutzen-grune-wiesen-schonen (accessed on 2 December 2021).					1
65	Handwörterbuch der Stadt- und Raumentwicklung / Handbook of Urban and Spatial Development; Akademie für Raumforschung und Landesplanung / Academy for Spatial Research and Planning, Ed.; Hannover, 2018, ISBN 978-3-88838-559-9.						1
66	Brachflächen im Spannungsfeld zwischen Naturschutz und (baulicher) Wiedernutzung / Brownfields in the area of tension between nature conservation and (structural) re-use; Rieke Hansen; Heidebach, M.; Kuchler, F.; Pauleit, S., Eds.; BfN-Skripten No. 324; Bundesamt für Naturschutz (BfN) / Federal Agency for Nature Conservation (BfN): Bonn, 2012, ISBN 9783896240590.							1
67	Statistisches Bundesamt (Destatis) / Federal Statistical Office (Destatis). Flächennutzung / Land use: Flächennutzung / Land use. Available online: https://www.destatis.de/DE/Themen/Branchen-Unternehmen/Landwirtschaft-Forstwirtschaft-Fischerei/Flaechennutzung/_inhalt.html (accessed on 9 November 2020).					1
68	NABU (Naturschutzbund Deutschland) e. V. / NABU (Nature and Biodiversity Conservation Union) e. V. Nachhaltige Siedlungsentwicklung / Sustainable settlement development: Das NABU-Grundsatzprogramm zum Planen und Bauen in Deutschland / The NABU Policy Programme on Planning and Building in Germany; NABU (Naturschutzbund Deutschland) e. V. / NABU (Nature and Biodiversity Conservation Union) e. V., E…							1
69	Schubert, S.; Bunge, C.; Gellrich, A.; Schlippenbach, U.v.; Reißmann, D. Innenentwicklung in städtischen Quartieren: Die Bedeutung von Umweltqualität, Gesundheit und Sozialverträglichkeit / Inner development in urban neighbourhoods: The importance of environmental quality, health and social compatibility; Umweltbundesamt (UBA) / Federal Environment Agency, Ed., Dessau-Roßlau, 2019.							1
70	Trends der Siedlungsflächenentwicklung / Trends in settlement area development: Status quo und Projektion 2030 / Status quo and projection 2030; Hoymann, J.; Dosch, F.; Beckmann, G., Eds.; BBSR-Analysen kompakt No. 9; Bundesinst. für Bau- Stadt- und Raumforschung / Federal Institute for Research on Building, Urban Affairs and Spatial Development: Bonn, 2012, ISBN 978-3-87994-705-8.							1
71	Pauleit, S.; Hansen, R. Stadtbrachen als Chance / Urban brownfields as an opportunity: Perspektiven für mehr Grün den Städten / Prospects for more green in the cities; Bundesamt für Naturschutz (BfN) / Federal Ministery for Nature Conservation (BfN), Ed., 2016.							1
72	Jering, A.; Klatt, A.; Seven, J.; Ehlers, K.; Günther, J.; Ostermeier, A.; Mönch, L. Globale Landflächen und Biomasse - nachhaltig und ressourcenschonend nutzen / Global land areas and biomass - sustainable and resource-conserving use; Umweltbundesamt (UBA) / Federal Environment Agency, Ed., 2013.							1
73	Rößler, S.; Mathey, J. Brachfläche, Konversionsfläche / Fallow land, conversion area. In: Handwörterbuch der Stadt- und Raumentwicklung / Handbook of Urban and Spatial Development; Akademie für Raumforschung und Landesplanung / Academy for Spatial Research and Planning, Ed.; Hannover, 2018; pp 295–305, ISBN 978-3-88838-559-9.							1
74	Al-Jabri, H.; Das, P.; Khan, S.; Thaher, M.; AbdulQuadir, M. Treatment of Wastewaters by Microalgae and the Potential Applications of the Produced Biomass—A Review. Water 2021, 13, 27, doi:10.3390/w13010027.		1
75	Abedi, E.; Hashemi, S.M.B. Lactic acid production - producing microorganisms and substrates sources-state of art. Heliyon 2020, 6, e04974, doi:10.1016/j.heliyon.2020.e04974.		1
76	Bussa, M.; Zollfrank, C.; Röder, H. Life-cycle assessment and geospatial analysis of integrating microalgae cultivation into a regional economy. Journal of Cleaner Production 2020, 243, 118630, doi:10.1016/j.jclepro.2019.118630.		1
77	Eisen, A.; Bussa, M.; Röder, H. A review of environmental assessments of biobased against petrochemical adhesives. Journal of Cleaner Production 2020, 277, 124277, doi:10.1016/j.jclepro.2020.124277.		1
78	Li, G.; Lu, Z.; Zhang, J.; Li, H.; Zhou, Y.; Mohammed Ibrahim Zayan, A.; Huang, Z. Life cycle assessment of biofuel production from microalgae cultivated in anaerobic digested wastewater. International Journal of Agricultural and Biological Engineering 2020, 13, 241–246, doi:10.25165/j.ijabe.20201301.4178.		1
79	Onen Cinar, S.; Chong, Z.K.; Kucuker, M.A.; Wieczorek, N.; Cengiz, U.; Kuchta, K. Bioplastic Production from Microalgae: A Review. Int. J. Environ. Res. Public Health 2020, 17, doi:10.3390/ijerph17113842.		1
80	Bussa, M.; Eisen, A.; Zollfrank, C.; Röder, H. Life cycle assessment of microalgae products: State of the art and their potential for the production of polylactid acid. Journal of Cleaner Production 2019, 213, 1299–1312, doi:10.1016/j.jclepro.2018.12.048.		1
81	Schröter-Schlaack, C.; Aicher, C.; Grünwald, R.; Revermann, C.; Schiller, J. Das Potenzial algenbasierter Kraftstoffe für den Lkw-Verkehr / The potential of algae-based fuels for truck transport: Sachstandsbericht zum Monitoring »Nachhaltige Potenziale der Bioökonomie – Biokraftstoffe der 3. Generation« / Status report on the monitoring "Sustainable potentials of the bioeconomy - 3rd generation b…							1
82	Wollmann, F.; Dietze, S.; Ackermann, J.-U.; Bley, T.; Walther, T.; Steingroewer, J.; Krujatz, F. Microalgae wastewater treatment: Biological and technological approaches. Eng. Life Sci. 2019, 19, 860–871, doi:10.1002/elsc.201900071.		1
83	Skarka, J. Potenziale zur Erzeugung von Biomasse aus Mikroalgen in Europa unter besonderer Berücksichtigung der Flächen- und CO2-Verfügbarkeit / Potentials for the production of biomass from microalgae in Europe with special consideration of land and CO2 availability. Dissertation; Karlsruher Institut für Technologie (KIT) / Karlsruhe Institute for Technology, Karlsruhe, 2015, doi:10.5445/IR/1000…		1
84	Driver, T.; Bajhaiya, A.; Pittman, J.K. Potential of Bioenergy Production from Microalgae. Curr Sustainable Renewable Energy Rep 2014, 1, 94–103, doi:10.1007/s40518-014-0011-8.		1
85	Gendy, T.S.; El-Temtamy, S.A. Commercialization potential aspects of microalgae for biofuel production: An overview. Egyptian Journal of Petroleum 2013, 22, 43–51, doi:10.1016/j.ejpe.2012.07.001.		1
86	Hempel, N. Biodieselproduktion aus Mikroalgen / Biodiesel production from microalgae. Dissertation; Technischen Universität Berlin, Berlin, 2013.			1
87	Slade, R.; Bauen, A. Micro-algae cultivation for biofuels: Cost, energy balance, environmental impacts and future prospects. Biomass and Bioenergy 2013, 53, 29–38, doi:10.1016/j.biombioe.2012.12.019.		1
88	Nguyen, C.M.; Kim, J.-S.; Song, J.K.; Choi, G.J.; Choi, Y.H.; Jang, K.S.; Kim, J.-C. D-lactic acid production from dry biomass of Hydrodictyon reticulatum by simultaneous saccharification and co-fermentation using Lactobacillus coryniformis subsp. torquens. Biotechnol. Lett. 2012, 34, 2235–2240, doi:10.1007/s10529-012-1023-3.		1
89	Collet, P.; Hélias, A.; Lardon, L.; Ras, M.; Goy, R.-A.; Steyer, J.-P. Life-cycle assessment of microalgae culture coupled to biogas production. Bioresour. Technol. 2011, 102, 207–214, doi:10.1016/j.biortech.2010.06.154.		1
90	Weinberger, F.; Paalme, T.; Wikström, S.A. Seaweed resources of the Baltic Sea, Kattegat and German and Danish North Sea coasts. Botanica Marina 2020, 63, 61–72, doi:10.1515/bot-2019-0019.		1
91	Balina, K.; Romagnoli, F.; Blumberga, D. Seaweed biorefinery concept for sustainable use of marine resources. Energy Procedia 2017, 128, 504–511, doi:10.1016/j.egypro.2017.09.067.			1
92	Englund, O.; Börjesson, P.; Berndes, G.; Scarlat, N.; Dallemand, J.-F.; Grizzetti, B.; Dimitriou, I.; Mola-Yudego, B.; Fahl, F. Beneficial land use change: Strategic expansion of new biomass plantations can reduce environmental impacts from EU agriculture. Global Environmental Change 2020, 60, 101990, doi:10.1016/j.gloenvcha.2019.101990.		1
93	Shepherd, A.; Clifton‐Brown, J.; Kam, J.; Buckby, S.; Hastings, A. Commercial experience with miscanthus crops: Establishment, yields and environmental observations. GCB Bioenergy 2020, 12, 510–523, doi:10.1111/gcbb.12690.		1
94	Cossel, M.v.; Mangold, A.; Iqbal, Y.; Hartung, J.; Lewandowski, I.; Kiesel, A. How to Generate Yield in the First Year—A Three-Year Experiment on Miscanthus (Miscanthus × giganteus (Greef et Deuter)) Establishment under Maize (Zea mays L.). Agronomy 2019, 9, 237, doi:10.3390/agronomy9050237.		1
95	Wagner, M.; Mangold, A.; Lask, J.; Petig, E.; Kiesel, A.; Lewandowski, I. Economic and environmental performance of miscanthus cultivated on marginal land for biogas production. GCB Bioenergy 2019, 11, 34–49, doi:10.1111/gcbb.12567.		1
96	Dimitriou, I.; Rutz, D. Sustainable short rotation coppice: A handbook; WIP Renewable Energies: Munich, 2015, ISBN 978-3-936338-36-2.							1
97	Keller, H.; Rettenmaier, N.; Reinhardt, G. Integrated sustainability assessment of bioenergy and bio-based products from perennial grasses cultivated on marginal land: In: OPTIMA project reports, supported by the EU's FP7 under GA no. 289642, Heidelberg, Germany, 2015.							1
98	University of Goettingen. SIGNAL - Research on innovative agroforestry systems. Available online: http://www.signal.uni-goettingen.de/home/central-objective/ (accessed on 7 January 2022).								1
99	Becker, A.; Peters, D.; Kemnitz, D. Anbau und Verwendung nachwachsender Rohstoffe in Deutschland / Cultivation and use of renewable raw materials in Germany; Fachagentur Nachwachsende Rohstoffe e. V. (FNR) / Agency for renewable resources, Ed., 2021.							1
100	Damianidis, C.; Santiago-Freijanes, J.J.; den Herder, M.; Burgess, P.; Mosquera-Losada, M.R.; Graves, A.; Papadopoulos, A.; Pisanelli, A.; Camilli, F.; Rois-Díaz, M.; et al. Agroforestry as a sustainable land use option to reduce wildfires risk in European Mediterranean areas. Agroforest Syst 2020, 17, 274, doi:10.1007/s10457-020-00482-w.		1
101	Böhm, C., Nawroth, G., Warth, P. Roadmap Agroforstwirtschaft / Roadmap Agroforestry: Bäume als Bereicherung für landwirtschaftliche Flächen in Deutschland / Trees as an Enrichment for Agricultural Land in Germany; Frauenhofer Institut für Arbeitswissenschaft und Organisation (IAO) / Frauenhofer Institute for Industrial Engineering and Organisation (IAO), Ed., 2019, ISBN 978-3-8396-1491-4.							1
102	Kröber, M. Kurzumtriebsplantagen auf Ackerland – ökonomische Bewertung einer Anbauoption mit ökologischen Vorteilen am Beispiel des Freistaats Sachsen / Short rotation coppice on arable land - economic evaluation of a cultivation option with ecological advantages using the example of the Free State of Saxony. Dissertation; Martin‐Luther‐Universität Halle‐Wittenberg / Martin-Luther University Hall…			1
103	Dauber, J.; Miyake, S. To integrate or to segregate food crop and energy crop cultivation at the landscape scale?: Perspectives on biodiversity conservation in agriculture in Europe. Energ Sustain Soc 2016, 6, 1729, doi:10.1186/s13705-016-0089-5.		1
104	Kanzler, M.; Böhm, C. Nachhaltige Erzeugung von Energieholz in Agroforstsystemen (AgroForstEnergie II) / Sustainable production of energy wood in agroforestry systems (AgroForstEnergie II); Brandenburgische Technische Universität Cottbus-Senftenberg / Brandenburg University of Technology Cottbus-Senftenberg, Ed., 2015.							1
105	Dauber, J.; Bolte, A. Bioenergy: Challenge or support for the conservation of biodiversity? GCB Bioenergy 2014, 6, 180–182, doi:10.1111/gcbb.12188.							1
106	Aust, C. Abschätzung der nationalen und regionalen Biomassepotentiale von Kurzumtriebsplantagen auf landwirtschaftlichen Flächen in Deutschland / Estimation of the national and regional biomass potential of short rotation coppice on agricultural land in Germany. Dissertation; Albert-Ludwigs-Universität Freiburg i. Brsg.; Albert-Ludwigs-University Freiburg i. Brsg., Freiburg, 2012.			1
107	Dauber, J.; Brown, C.; Fernando, A.L.; Finnan, J.; Krasuska, E.; Ponitka, J.; Styles, D.; Thrän, D.; van Groenigen, K.J.; Weih, M.; et al. Bioenergy from “surplus” land: Environmental and socio-economic implications. BR 2012, 7, 5–50, doi:10.3897/biorisk.7.3036.		1
108	Rois, M.; Michael den Herder; Paulo, J.A.; Tomás, A. Agroforestry contribute to circular bioeconomy: European Union's Horizon 2020 reserach and innovation programm under grant agreement NO 727872; Agroforestry innovation network, Ed., 2019.							1
109	Wolfe, M. Agroforestry and decentralised food and energy production: Produced by the AGFORWARD research project funded by the European Union’s Seventh Framework Programme for research, technological development and demonstration under grant agreement No 613520, 2017.							1
110	Bäume als Bereicherung für landwirtschaftliche Flächen / Trees as enrichment for agricultural land: Ein Innovationskonzept für die verstärkte Umsetzung der Agroforstwirtschaft in Deutschland / An innovation concept for the increased implementation of agroforestry in Germany. „Innovationsgruppe AUFWERTEN – Agroforstliche Umweltleistungen / "Innovation Group AUFWERTEN - Agroforestry Environmental S…							1
111	Hochschule für nachhaltige Entwicklung Eberswalde / Eberswalde University for Sustainable Development. Konzeption eines Agroforst-Modellvorhabens für das Löwenberger Land (Brandenburg) / Conception of an agroforestry model project for Löwenberger Land (Brandenburg); Hochschule für nachhaltige Entwicklung Eberswalde / Eberswalde University for Sustainable Development, Ed., 2017.							1
112	Lamerre, J.; Langhof, M.; Sevke-Masur, K.; Schwarz, K.-U.; Wühlisch, G.v.; Swieter, A.; Greef, J.M.; Dauber, J.; Hirschberg, F.; Joormann, I.; et al. Nachhaltige Erzeugung von Energieholz in Agroforstsystemen / Sustainable production of energy wood in agroforestry systems: Teilprojekt 3: Standort Niedersachsen; Strukturvielfalt und Biodiversität / Sub-project 3: Lower Saxony as a location; struct…							1
113	Michael den Herder; Moreno, G.; Mosquera-Losada, R.; Palma, J.; Sidiropoulou, A.; Freijanes, J.J.S.; Crous-Duran, J.; Paulo, J.; Tomé, M.; Pantera, A.; et al. D1.2: Current extent and trends of agroforestry in the EU27: AGFORWARD (Grant Agreement N° 613520) is co-funded by the European Commission, Directorate General for Research & Innovation, within the 7th Framework Programme of RTD. The views …							1
114	Malignier, N.; Balaguer, F. Annex to Deliverable 1.2: Current extent and trends of agroforestry in France: AGFORWARD (Grant Agreement N° 613520) is co-funded by the European Commission, Directorate General for Research & Innovation, within the 7th Framework Programme of RTD. The views and opinions expressed in this report are purely those of the writers and may not in any circumstances be regarde…							1
115	Mosquera-Losada; N, F.-D.; Fj, R.-R.; Jj, S.-F.; A, V.; A, R.-R. Bio-economy products: alternative uses of trees. Available online: http://agroforestrynet.eu/wp-content/uploads/2019/11/83ingles.pdf (accessed on 7 January 2022).								1
116	Losada-Fernández, E.; Mosquera-Losada; Ferreiro-Domínguez,N, Rodríguez-Rigueiro,Fj; Santiago-Freijanes, JJ, Villada, A; Rigueiro-Rodríguez, A. Bio-economy products: alternative uses of shrubs. Available online: http://agroforestrynet.eu/wp-content/uploads/2019/11/84ingles.pdf (accessed on 7 January 2022).								1
117	Böhm, C.; Tsonkova, P.; Mohr, T.; Schröder, C.; Lorenz, C.; Marcel; Ludewig; Bösel, B.; Dommel, J.; Wagner, N.; et al. Konzept zur Förderung von Agroforstflächen als Agrarumwelt- und Klimamaßnahme (AUKM) im Rahmen des Kulturlandschaftsprogramms (KULAP) des Landes Brandenburg / Concept for the promotion of agroforestry areas as an agri-environmental and climate measure (AUKM) within the framework …							1
118	Lewandowski, I.; Cossel, M.v. Welche Biomassepflanzen braucht eine nachhaltige Bioökonomie? / Which biomass crops does a sustainable bioeconomy need? Ökologie und Bioökonomie / Ecology and bioeconomy; Dr. Friedrich Pfeil: München, 2019, ISBN 978-3-89937-246-5.							1
119	Fehrenbach, H.; Köppen, S.; Breitmayer, E.; Essel, R.; Baur, F.; Kay, S.; Wern, B.; Bienge, K.; Geibler, J.v.; Kauertz, B.; et al. Biomassekaskaden - Mehr Ressourceneffizienz durch stoffliche Kaskadennutzung von Biomasse – von der Theorie zur Praxis / Biomass cascades - More resource efficiency through material cascade use of biomass - from theory to practice; Umweltbundesamt (UBA) / Federal Envi…							1
120	Thrän, D.; Lauer, M.; Dotzauer, M.; Kalcher, J.; Oehmichen, K.; Majer, S.; Millinger, M.; Jordan, M. Technoökonomische Analyse und Transformationspfade des energetischen Biomassepotentials (TATBIO)/ Techno-economic Analysis and Transformation Pathways of Biomass Energy Potential (TATBIO): Endbericht/Final Report; DBFZ Deutsches Biomasseforschungszentrum gemeinnützige GmbH, Ed., Leipzig, 2019.							1
121	Thrän, D.; Szarka, N.; Haufe, H.; Lenz, V.; Majer, S.; Oehmichen, K.; Jordan, M.; Millinger, M.; Schaldach, R.; Schüngel, J. BioplanW: Systemlösungen Bioenergie im Wärmesektor im Kontext zukünftiger Entwicklungen / BioplanW: System solutions bioenergy in the heating sector in the context of future developments: Schlussbericht / Final Report; DBFZ Deutsches Biomasseforschungszentrum gemeinnützige …							1
122	German Emissions Trading Authority (DEHSt) at German Environment Agency. Factsheet: Peatlands 2020.							1
123	Tanneberger, F.; Schröder, C.; Hohlbein, M.; Lenschow, U.; Permien, T.; Wichmann, S.; Wichtmann, W. Climate Change Mitigation through Land Use on Rewetted Peatlands – Cross-Sectoral Spatial Planning for Paludiculture in Northeast Germany. Wetlands 2020, 130, 219, doi:10.1007/s13157-020-01310-8.		1
124	Abel, S.; Barthelmes, A.; Gaudig, G.; Joosten, H.; Nordt, A.; Peters, J. Klimaschutz auf Moorböden / Climate protection on peat soils: Lösungsansätze und Best-Practice-Beispiele / Approaches and best practice examples; Greifswald Moor Centrum, Ed.; Greifswalder Moor Centrum-Schriftenreihe No. 03, 2019.							1
125	Wichmann, S. Economic incentives for climate smart agriculture on peatlands in the EU. Project CINDERELLA -Comparative analysis,; University of Greifswald, Ed., 2018.							1
126	Dahms, T.; Oehmke, C.; Kowatsch, A.; Abel, S.; Wichmann, S.; Wichtmann, W.; Schröder, C. Halmgutartige Festbrennstoffe aus nassen Mooren / Stalk-type solid fuels from wet peatlands: Paludi-Pellets-Broschüre / Paludi pellets brochure; Universität Greifswald / University of Greifswald, Ed., 2017.							1
127	Naturkapital und Klimapolitik / Natural capital and climate policy: Synergien und Konflikte / Synergies and conflicts; Hartje, V.; Wüstemann, H.; Bonn, A., Eds.; Technische Universität Berlin; Helmholtz-Zentrum für Umweltforschung - UFZ: Berlin, Leipzig, 2015, ISBN 9783944280158.							1
128	Roßkopf, N.; Fell, H.; Zeitz, J. Organic soils in Germany, their distribution and carbon stocks. CATENA 2015, 133, 157–170, doi:10.1016/j.catena.2015.05.004.		1
129	Landesamt für Landwirtschaft, Umwelt und Ländliche Räume Schleswig-Holstein. Potentiale und Ziele zum Moor- und Klimaschutz / Potentials and goals for peatland and climate protection: Gemeinsame Erklärung der Naturschutzbehörden / Joint declaration of the nature conservation authorities; Flintbek, 2012, ISBN 978-3-937937-62-5.							1
130	Wichtmann, W.; Joosten, H. Paludiculture: Peat formation and renewable resources from rewetted peatlands; International Mire Conservation Group, Ed.; IMCG Newsletter No. 3, 2007.							1
131	Scheffler, M.; Wiegmann, K. Quantifizierung von Maßnahmenvorschlägen der deutschen Zivilgesellschaft zu THG - Minderungspotenzialen in der Landwirtschaft bis 2030 / Quantification of proposed measures by German civil society on GHG mitigation potentials in agriculture until 2030: Kurzstudie im Auftrag der Klima-Allianz Deutschland / Short study commissioned by Climate Alliance Germany; Oeko-Insti…							1
132	Bolte, A.; Höhl, M.; Hennig, P.; Schad, T.; Kroiher, F.; Seintsch, B.; Englert, H.; Rosenkranz, L. Zukunftsaufgabe Waldanpassung / Future task of forest adaptation. AFZ -Der Wald 2021, 4.							1
133	Schulze, E.-D.; Rock, J.; Kroiher, F.; Egenolf, V.; Welbrock, N.; Irslinger, R.; Bolte, A.; Spellmann, H. Klimaschutz mit Wald : Speicherung von Kohlenstoff im Ökosystem und Substitution fossiler Brennstoffe / Climate protection with forests : storing carbon in the ecosystem and substituting fossil fuels; Thünen-Institut für Internationale Waldwirtschaft und Forstökonomie / Thünen Institute for I…		1
134	Agrarsoziale Gesellschaft e.V. / Agrarsoziale Gesellschaft e.V. Wald im Klimawandel / Forest in climate change; Agrarsoziale Gesellschaft e.V. / Agrarsoziale Gesellschaft e.V., Ed.; Ländlicher Raum, Göttingen, 2020.							1
135	Bundesamt für Naturschutz (BfN) / Federal Ministery for Nature Conservation (BfN). Wälder im Klimawandel: Steigerung von Anpassungsfähigkeit und Resilienz durch mehr Vielfalt und Heterogenität / Forests in a changing climate: increasing adaptive capacity and resilience through more diversity and heterogeneity; Bundesamt für Naturschutz (BfN) / Federal Ministery for Nature Conservation (BfN), Ed.,…							1
136	Schulze, E.D.; Sierra, C.A.; Egenolf, V.; Woerdehoff, R.; Irslinger, R.; Baldamus, C.; Stupak, I.; Spellmann, H. The climate change mitigation effect of bioenergy from sustainably managed forests in Central Europe. GCB Bioenergy 2020, 12, 186–197, doi:10.1111/gcbb.12672.		1
137	Wissenschaftlicher Beirat Waldpolitik beim BMEL / Scientific Advisory Council on Forest Policy at the BMEL. Eckpunkte der Waldstrategie 2050 / Cornerstones of the Forest Strategy 2050; Wissenschaftlicher Beirat Waldpolitik beim BMEL / Scientific Advisory Council on Forest Policy at the BMEL, Ed., Berlin, 2020.							1
138	Leskinen, P.; Cardellini, G.; González-García, S.; Hurmekoski, E.; Sathre, R.; Seppälä, J.; Smyth, C.; Stern, T.; Verkerk, P.J. Substitution effects of wood-based products in climate change mitigation; European Forest Institute, Ed.; From Science to Policy 7, 2018, doi:10.36333/fs07.							1
139	Bauhus; Jürgen. Beiträge der Forst- und Holzwirtschaft zum Klimaschutz / Contributions of the forestry and timber industry to climate protection. Allgemeine Forstzeitschrift für Waldwirtschaft und Umweltvorsorge / General forestry journal for forest management and environmental care 2017, 10–14.							1
140	Kristin Gerber, Steffi Röhling, Karsten Dunger, Susann Klatt, Katja Oehmichen. Regionalisierte Ergebnisse der alternativen WEHAM-Szenarien / Regionalised results of the alternative WEHAM scenarios; Thünen Working Paper No. 102, Eberswalde, 2018.							1
141	Schier, F.; Weimar, H. Holzmarktmodellierung - Szenarienbasierte Folgenabschätzung verschiedener Rohholzangebotssituationen für den Sektor Forst und Holz / Timber market modelling - Scenario-based impact assessment of different raw wood supply situations for the forestry and timber sector; Thünen Working Paper No. 91, Hamburg, 2018.							1
142	Glasenapp, S.; Döring, P.; Blanke, C.; Mantau, U. Entwicklung von Holzverwendungsszenarien / Development of wood use scenarios: Abschlussbericht WEHAM – AP 3.2 / Final Report WEHAM - WP 3.2; Universität Hamburg / University of Hamburg, Ed., 2017.							1
143	Rüter, S.; Stümer, W.; Dunger, K. Treibhausgasbilanzen der WEHAM-Szenarien / Greenhouse gas balances of the WEHAM scenarios. Allgemeine Forstzeitschrift für Waldwirtschaft und Umweltvorsorge / General forestry journal for forest management and environmental care 2017, 30–31.							1
144	Chirici, G.; Winter, S.; McRoberts, R.E. National Forest Inventories: Contributions to Forest Biodiversity Assessments; Springer Netherlands: Dordrecht, 2011, ISBN 978-94-007-0481-7.							1
145	Reise, J.; Kukulka, F.; Trotzer, S.; Winter, S. Biodiversität in Zahlen – Die Bundeswaldinventur als Grundlage für ein Biodiversitätsmonitoring im Wald / Biodiversity in figures - The Federal Forest Inventory as a basis for biodiversity monitoring in the forest: WEHAM-Szenarien / WEHAM scenarios; Johann Heinrich von Thünen-Institut, Ed., 2017. Available online: https://www.weham-szenarien.de/file…		1
146	Oehmichen, K.; Klatt, S.; Gerber, K.; Polley, H.; Röhling, S.; Dunger, K. Die alternativen WEHAM-Szenarien / The alternative WEHAM scenarios: Holzpräferenz, Naturschutzpräferenz und Trendfortschreibung : Szenarienentwicklung, Ergebnisse und Analyse / Wood Preference, Conservation Preference and Trend Update : Scenario Development, Results and Analysis; Johann Heinrich von Thünen-Institut, Ed.; Th…		1
147	Döring, P.; Glasenapp, S.; Mantau, U. Regionale Derbholzverwendung und Vergleich zum WEHAM-Derbholzpotenzial / Regional derb wood use and comparison to WEHAM derb wood potential: Abschlussbericht zum Teilvorhaben des Verbundforschungsprojekts WEHAM-Szenarien (AP 3.2) / Final report on the sub-project of the joint research project WEHAM scenarios (WP 3.2) 2017.							1
148	Bringezu, S.; Banse, M.; Ahmann, L.; Bezama, N.A.; Billig, E.; Bischof, R.; Blanke, C.; Brosowski, A.; Brüning, S.; Borchers, M.; et al. Pilotbericht zum Monitoring der deutschen Bioökonomie / Pilot report on the monitoring of the German bioeconomy; Center for Environmental Systems Research (CESR) Universität Kassel, Ed., Kassel, 2020, doi:10.17170/kobra-202005131255.		1
149	Agentur für Erneuerbare Energien e.V. / Agency for Renewable Energies e.V. Wärme und Kälte aus Erneuerbaren Energien in Deutschland 2020 / Heating and cooling from renewable energies in Germany 2020. Available online: https://www.unendlich-viel-energie.de/mediathek/grafiken/waerme-und-kaelte-aus-erneuerbaren-energien-in-deutschland-2020 (accessed on 2 December 2021).					1
150	BDEW Bundesverband der Energie- und Wasserwirtschaft e.V. / BDEW German Association of Energy and Water Industries e.V. Bruttostromerzeugung nach Energieträgern in Deutschland / Gross electricity generation by energy source in Germany: Vorjahresvergleich / year-on-year comparison. Available online: https://www.bdew.de/media/documents/Bruttostromerz_D_Vgl_VJ_online_o_jaehrlich_Ki_19112021.pdf (acc…					1
151	Orsi, E.; Beekwilder, J.; Eggink, G.; Kengen, S.W.M.; Weusthuis, R.A. The transition of Rhodobacter sphaeroides into a microbial cell factory. Biotechnol. Bioeng. 2021, 118, 531–541, doi:10.1002/bit.27593.		1
152	Kunz, S.; Wach, W.; Kraus, W. Biorefinery Zeitz of the Südzucker Group – Status Quo and Future Perspectives. Chemie Ingenieur Technik 2020, 92, 1752–1763, doi:10.1002/cite.202000061.		1
153	Springer-Verlag GmbH; Springer Spektrum Redaktion Biospektrum. Beiträge zu "Mirkobiellen Biofabriken" / Contributions to "Microbial Biofactories", 26th ed.; Heidelberg, 2020. BioSpektrum, 26 (4). Available online: https://www.biospektrum.de/magazine/4-2020 (accessed on 1 December 2021).							1
154	Voigt, C.A. Synthetic biology 2020-2030: Six commercially-available products that are changing our world. Nat. Commun. 2020, 11, 6379, doi:10.1038/s41467-020-20122-2.		1
155	Cavicchioli, R.; Ripple, W.J.; Timmis, K.N.; Azam, F.; Bakken, L.R.; Baylis, M.; Behrenfeld, M.J.; Boetius, A.; Boyd, P.W.; Classen, A.T.; et al. Scientists' warning to humanity: Microorganisms and climate change. Nat. Rev. Microbiol. 2019, 17, 569–586, doi:10.1038/s41579-019-0222-5.		1
156	McCarty, N.S.; Ledesma-Amaro, R. Synthetic Biology Tools to Engineer Microbial Communities for Biotechnology. Trends Biotechnol. 2019, 37, 181–197, doi:10.1016/j.tibtech.2018.11.002.		1
157	Construction biotechnology: Biogeochemistry, microbiology and biotechnology of construction materials and processes; Ivanov, V.; Stabnikov, V., Eds.; Green energy and technology; Springer: Singapore, 2017, ISBN 978-981-10-1445-1.						1
158	Vitorino, L.C.; Bessa, L.A. Technological Microbiology: Development and Applications. Front. Microbiol. 2017, 8, 827, doi:10.3389/fmicb.2017.00827.		1
159	Chubukov, V.; Mukhopadhyay, A.; Petzold, C.J.; Keasling, J.D.; Martín, H.G. Synthetic and systems biology for microbial production of commodity chemicals. NPJ Syst. Biol. Appl. 2016, 2, 16009, doi:10.1038/npjsba.2016.9.		1
160	Murphy, C.D. The microbial cell factory. Org. Biomol. Chem. 2012, 10, 1949–1957, doi:10.1039/c2ob06903b.		1
161	Zentrale Kommission für die Biologische Sicherheit. Synthetic Biology: 2nd Interim report of the German Central Committee on Biological Safety 2018.							1
162	Takkellapati, S.; Li, T.; Gonzalez, M.A. An Overview of Biorefinery Derived Platform Chemicals from a Cellulose and Hemicellulose Biorefinery. Clean Technol. Environ. Policy 2018, 20, 1615–1630, doi:10.1007/s10098-018-1568-5.		1
163	Lindorfer, J., Lettner, M., Hesser, F., Fazeni, K., Rosenfeld, D., Annevelink, B., Mandl, M. Technical, Economic and Environmental Assessment of Biorefinery Concepts: Developing a practical approach for characterisation; International Energy Agency (IEA) Bioenergy Task 43, Ed., 2019, ISBN 978-1-910154-64-9							1
164	Bezama, A.; Ingrao, C.; O’Keeffe, S.; Thrän, D. Resources, Collaborators, and Neighbors: The Three-Pronged Challenge in the Implementation of Bioeconomy Regions. Sustainability 2019, 11, 7235, doi:10.3390/su11247235		1
165	Rohleder, B.; Krüsken, B.; Reinhardt, H. Digitalisierung der Landwirtschaft 2020 / Digitisation of agriculture 2020; Bitkom; Deutscher Bauernverband; Rentenbank, Eds., 2020.							1
166	Beluhova-Uzunova, R.; Dunchev, D. Precision Farming - Concepts and perspectives. Problems of Agricultural Economics 2019, 360, 142–155, doi:10.30858/zer/112132.		1
167	Deutsche Bundesregierung / German Federal Government. Antwort der Bundesregierung auf die Kleine Anfrage der Abgeordneten Dr. Kirsten Tackmann, Anke DomscheitBerg, Dr. Petra Sitte, weiterer Abgeordneter und der Fraktion DIE LINKE / Answer by the Federal Government to the minor question by Dr Kirsten Tackmann, Anke Domscheit-Berg, Dr Petra Sitte, other MPs and the parliamentary group DIE LINKE: Ri…							1
168	Finger, R.; Swinton, S.M.; El Benni, N.; Walter, A. Precision Farming at the Nexus of Agricultural Production and the Environment. Annual Review of Resource Economics 2019, 11, 313–335, doi:10.1146/annurev-resource-100518-093929.		1
169	Paul, C.; Techen, A.-K.; Robinson, J.S.; Helming, K. Rebound effects in agricultural land and soil management: Review and analytical framework. Journal of Cleaner Production 2019, 227, 1054–1067, doi:10.1016/j.jclepro.2019.04.115.		1
170	Waltmann, M.; Gindele, N.; Doluschitz, R. Ökonomische Parameter in Precision Agriculture – strukturelle Anforderungen und Wirkungen in Deutschland / Economic Parameters in Precision Agriculture - Structural Requirements and Effects in Germany: Digitalisierung in kleinstrukturierten Regionen, / Digitalisation in Small Structured Regions Lecture Notes in Informatics (LNI); Gesellschaft für Informat…							1
171	Entwicklung des regionalen Bewässerungsbedarfs – Engpässe in der Zukunft? / Development of regional irrigation demand - bottlenecks in the future?; Thünen-Institut, Bundesforschungsinstitut für Ländliche Räume, Wald und Fischerei, Ed., Proceedings of the Fachtagung, Suderburg, 11./12.09., 2017.							1
172	Balafoutis, A.; Beck, B.; Fountas, S.; Vangeyte, J.; Wal, T.; Soto, I.; Gómez-Barbero, M.; Barnes, A.; Eory, V. Precision Agriculture Technologies Positively Contributing to GHG Emissions Mitigation, Farm Productivity and Economics. Sustainability 2017, 9, 1339, doi:10.3390/su9081339.		1
173	Paustian, M.; Theuvsen, L. Adoption of precision agriculture technologies by German crop farmers. Precision Agric 2017, 18, 701–716, doi:10.1007/s11119-016-9482-5.		1
174	Giesler, S. Digitalisierung in der Landwirtschaft – vom Precision Farming zum Farming 4.0 / Digitalisation in agriculture - from precision farming to Farming 4.0. Available online: https://www.biooekonomie-bw.de/fachbeitrag/dossier/digitalisierung-in-der-landwirtschaft-vom-precision-farming-zum-farming-40 (accessed on 7 January 2022).								1
175	Bovensiepen, G.; Hombach, R.; Raimund, S. Quo vadis, agricola? ; Pricewaterhouse Coopers AG Wirtschaftsprüfungsgesellschaft (PwC), Ed., 2016.							1
176	Rohleder, B.; Krüsken, B. Digitalisierung der Landwirtschaft / Digitisation of agriculture; Berlin, 2016.							1
177	BMBF; BMEL. National Bioeconomy Strategy; BMBF; BMEL, Eds., Berlin, 2020.							1
178	High Level Panel of Experts on Food Security and Nutrition (HLPE). Agroecological and other innovative approaches for sustainable agriculture and food systems that enhance food security and nutrition: A report by the High Level Panel of Experts on Food Security and Nutrition of the Committee on World Food Security, Rome, 2019.							1
179	Umweltbundesamt (UBA) / Federal Environment Agency. Daten zur Umwelt Ausgabe 2018 / Data on the Environment Issue 2018: Umwelt und Landwirtschaft / Environment and agriculture; Umweltbundesamt (UBA) / Federal Environment Agency, Ed., 2018.							1
180	Bundesministerium für Bildung und Forschung (BMBF) / Federal Ministry of Education and Research (BMBF). Meldungsarchiv - Strukturdaten zum Ökologischen Landbau in Deutschland / Reporting archive - Structural data on organic farming in Germany. Available online: https://www.ble.de/DE/Themen/Landwirtschaft/Oekologischer-Landbau/_functions/StrukturdatenOekolandbau_table.html?nn=8903860 (accessed on …					1
181	Bundesministerium für Landwirtschaft (BLE). Ökologischer Landbau in Deutschland 2010 / Organic Farming in Germany 2010; Bundesministerium für Landwirtschaft (BLE), Ed., 2010.					1
182	Bundesministerium für Landwirtschaft (BLE). Ökologischer Landbau in Deutschland 2011 / Organic Farming in Germany 2011; Bundesministerium für Landwirtschaft (BLE), Ed., 2011.					1
183	Bundesministerium für Landwirtschaft (BLE). Ökologischer Landbau in Deutschland 2012 / Organic Farming in Germany 2012; Bundesministerium für Landwirtschaft (BLE), Ed., 2012.					1
184	Bundesministerium für Landwirtschaft (BLE). Ökologischer Landbau in Deutschland 2014 / Organic farming in Germany 2014; Bundesministerium für Landwirtschaft (BLE), Ed., 2014.					1
185	Bundesministerium für Landwirtschaft (BLE). Ökologischer Landbau in Deutschland 2015 / Ecological Farming in Germany 2015; Bundesministerium für Landwirtschaft (BLE), Ed., 2015.					1
186	Bundesministerium für Landwirtschaft (BLE). Ökologischer Landbau in Deutschland 2016 / Organic Farming in Germany 2016; Bundesministerium für Landwirtschaft (BLE), Ed., 2016.					1
187	Bundesministerium für Landwirtschaft (BLE). Ökologischer Landbau in Deutschland 2017 / Organic Farming in Germany 2017; Bundesministerium für Landwirtschaft (BLE), Ed., 2017.					1
188	Bundesministerium für Landwirtschaft (BLE). Ökologischer Landbau in Deutschland 2018 / Organic Farming in Germany 2018; Bundesministerium für Landwirtschaft (BLE), Ed., 2018.					1
189	Bundesministerium für Landwirtschaft (BLE). Ökologischer Landbau in Deutschland 2019 / Organic Farming in Germany 2019; Bundesministerium für Landwirtschaft (BLE), Ed., 2019.					1
190	Deutsche Agrarforschungsallianz (DAFA) / German Agricultural Research Alliance (DAFA). Zielbild für die Landwirtschaft 2049 / Target picture for agriculture 2049, 2021. Available online: https://www.dafa.de/wp-content/uploads/Lesefassung-Zielbild-2049.pdf (accessed on 2 December 2021).							1
191	Hamm, U.; Häring, A.M.; Hülsbergen, K.-J.; Isermeyer, F.; Lange, S.; Niggli, U.; Rahmann, G.; Horn, S. Research strategy of the German Agricultural Research Alliance (DAFA) for the development of the organic farming and food sector in Germany. Org. Agr. 2017, 7, 225–242, doi:10.1007/s13165-017-0187-5.		1
192	Isselstein, J.; Michaelis, T.; Bellof, G. The Grassland Expert Forum: Innovative use of grassland for resource protection : the DAFA research strategy, State 12/2015; German Agricultural Research Alliance (DAFA): Braunschweig, 2015, ISBN 9783865761477.							1
193	Shaping aquaculture research!: Aquaculture expert forum : strategy of the German Agricultural Research Alliance; Lange, D., Ed.; Deutsche Agrarforschungsallianz (DAFA): Braunschweig, 2014, ISBN 9783865761446.							1
194	German Agricultural Research Alliance (DAFA). Expert Forum Bees and Agriculture: Researching synergies, developing solutions. Research Strategy of the German Agricultural Research Alliance; German Agricultural Research Alliance (DAFA), Ed., Braunschweig, 2020, doi:10.3220/DAFA1587459054000.							1
195	Deutsche Agrarforschungsallianz (DAFA). Fachforum Nutztiere : Zwischenbilanz nach sieben Jahren / Farm Animals Forum: interim assessment after seven years, 2018, doi:10.3220/DAFA1565961422000.							1
196	Haller, L.; Moakes, S.; Niggli, U.; Riedel, J.; Stolze, M.; Thompson, M. Entwicklungsperspektiven der ökologischen Landwirtschaft in Deutschland / Development perspectives of organic agriculture in Germany; Umweltbundesamt (UBA) / Federal Environment Agency, Ed.; Texte No. 32/2020, Dessau-Roßlau, 2020.							1
197	Sanders, J.; Heß, J. Leistungen des ökologischen Landbaus für Umwelt und Gesellschaft / Benefits of organic farming for the environment and society: 2. überarbeitete und ergänzte Auflage / 2nd revised and supplemented ed.; Johann Heinrich von Thünen-Institut, Ed.; Thünen Report No. 65, Braunschweig, 2019. Available online: doi:10.3220/REP1576488624000, doi:10.3220/REP1576488624000.		1
198	Poux, X.; Aubert, P.M. An agroecological Europe in 2050: Multifunctional agriculture for healthy eating: Findings from the Ten Years For Agroecology (TYFA) modelling exercise; Iddri-AScA, Ed.; Study No. 9/18, Paris, 2018.							1
199	Priefer, C.; Jörissen, J.; Frör, O. Pathways to Shape the Bioeconomy. Resources 2017, 6, 10, doi:10.3390/resources6010010.		1
200	D'Amato, D.; Gaio, M.; Semenzin, E. A review of LCA assessments of forest-based bioeconomy products and processes under an ecosystem services perspective. Sci. Total Environ. 2020, 706, 135859, doi:10.1016/j.scitotenv.2019.135859.		1
201	D'Amato, D.; Bartkowski, B.; Droste, N. Reviewing the interface of bioeconomy and ecosystem service research. Ambio 2020, 49, 1878–1896, doi:10.1007/s13280-020-01374-0.		1
202	Toppinen, A.; D’Amato, D.; Stern, T. Forest-based circular bioeconomy: Matching sustainability challenges and novel business opportunities? Forest Policy and Economics 2020, 110, 102041, doi:10.1016/j.forpol.2019.102041.		1
203	Dade, M.C.; Mitchell, M.G.E.; McAlpine, C.A.; Rhodes, J.R. Assessing ecosystem service trade-offs and synergies: The need for a more mechanistic approach. Ambio 2019, 48, 1116–1128, doi:10.1007/s13280-018-1127-7.		1
204	Díaz, S.; Settele, J.; S, E. S. Brondízio E.; Ngo, H.T.; Guèze, M.; Agard, J.; Arneth, A.; Balvanera, P.; Brauman, K.A.; Butchart, S.H.M.; et al. Summary for policymakers of the global assessment report on biodiversity and ecosystem services of the Intergovernmental Science-Policy Platform on Biodiversity and Ecosystem Services; IPBES, Ed., Bonn, 2019.							1
205	de Schutter; Giljum; Häyhä; Bruckner; Naqvi; Omann; Stagl. Bioeconomy Transitions through the Lens of Coupled Social-Ecological Systems: A Framework for Place-Based Responsibility in the Global Resource System. Sustainability 2019, 11, 5705, doi:10.3390/su11205705.		1
206	Haines-Young, R.; Potschin-Young, M. Revision of the Common International Classification for Ecosystem Services (CICES V5.1): A Policy Brief. OE 2018, 3, e27108, doi:10.3897/oneeco.3.e27108.		1
207	Olander, L.P.; Johnston, R.J.; Tallis, H.; Kagan, J.; Maguire, L.A.; Polasky, S.; Urban, D.; Boyd, J.; Wainger, L.; Palmer, M. Benefit relevant indicators: Ecosystem services measures that link ecological and social outcomes. Ecological Indicators 2018, 85, 1262–1272, doi:10.1016/j.ecolind.2017.12.001.		1
208	Schröter, M.; Koellner, T.; Alkemade, R.; Arnhold, S.; Bagstad, K.J.; Erb, K.-H.; Frank, K.; Kastner, T.; Kissinger, M.; Liu, J.; et al. Interregional flows of ecosystem services: Concepts, typology and four cases. Ecosystem Services 2018, 31, 231–241, doi:10.1016/j.ecoser.2018.02.003.		1
209	Costanza, R.; Groot, R. de; Braat, L.; Kubiszewski, I.; Fioramonti, L.; Sutton, P.; Farber, S.; Grasso, M. Twenty years of ecosystem services: How far have we come and how far do we still need to go? Ecosystem Services 2017, 28, 1–16, doi:10.1016/j.ecoser.2017.09.008.		1
210	Hamel, P.; Bryant, B.P. Uncertainty assessment in ecosystem services analyses: Seven challenges and practical responses. Ecosystem Services 2017, 24, 1–15, doi:10.1016/j.ecoser.2016.12.008.		1
211	Bürger-Arndt, Renate, Ohse, Bettina, Meyer, Katharinea, Höltermann, Anke. Ökosystemdienstleistungen von Wäldern / Ecosystem services of forests;; Bundesamt für Naturschutz (BfN) / Federal Agency for Nature Conservation (BfN), Ed., Proceedings of the Workshopbericht Internationale Naturschutzakademie 16. - 19. November 2011 / Workshop report International Academy of Nature Conservation 16 - 19 Nov…				1
212	Pérez-Soba, M.; Elbersen, B.; Kempen, M.; Braat, L.; Staristky, I.; van Wijngaart, R.; Kaphengst, T.; Andersen, E.; Germer, L.; Smith, L. Study on the role of agriculture as provisioning ecosystem service. Interim report to the Institute for Environment and Sustainability (JRC/IES); Alterra Wageningen UR; Ecologic Institute; University of Copenhagen and EuroCARE, Eds., 2012.							1
213	Costanza, R.; Cumberland, J.H.; Daly, H.E.; Goodland, R.J.A.; Norgaard, R.B. An introduction to ecological economics; St. Lucie Press; International Society for Ecological Economics: Boca Raton Fla., 1997, ISBN 1-884015-72-7.						1
214	Burkhard, B.; Santos-Martin, F.; Nedkov, S.; Maes, J. An operational framework for integrated Mapping and Assessment of Ecosystems and their Services (MAES). OE 2018, 3, e22831, doi:10.3897/oneeco.3.e22831.		1
215	Grunewald, K.; Syrbe, R.-U.; Walz, U.; Richter, B.; Meinel, G.; Herold, H.; Marzelli, S. Germany’s Ecosystem Services – State of the Indicator Development for a Nationwide Assessment and Monitoring. OE 2017, 2, e14021, doi:10.3897/oneeco.2.e14021.		1
216	Pörtner, H.O., Scholes, R.J., Agard, J., Archer, E., Arneth, A., Bai, X., Barnes, D., Burrows, M., Chan, L., Cheung, W.L. Scientific outcome of the IPBES-IPCC co-sponsored workshop on biodiversity and climate change; IPBES secretariat, Ed., Bonn, Germany, 2021, doi:10.5281/zenodo.4659158							1
217	Patel, A.; Shah, A.R. Integrated lignocellulosic biorefinery: Gateway for production of second generation ethanol and value added products. Journal of Bioresources and Bioproducts 2021, 236, 176, doi:10.1016/j.jobab.2021.02.001.		1
218	Saini, R.; Osorio-Gonzalez, C.S.; Hegde, K.; Brar, S.K.; Magdouli, S.; Vezina, P.; Avalos-Ramirez, A. Lignocellulosic Biomass-Based Biorefinery: An Insight into Commercialization and Economic Standout. Curr Sustainable Renewable Energy Rep 2020, 7, 122–136, doi:10.1007/s40518-020-00157-1.		1
219	Budzinski, M.; Cavalett, O.; Nitzsche, R.; Strømman, A.H. Assessment of lignocellulosic biorefineries in Germany using a hybrid LCA multi‐objective optimization model. J. Ind. Ecol. 2019, 23, 1172–1185, doi:10.1111/jiec.12857.		1
220	Budzinski, M.; Sisca, M.; Thrän, D. Consequential LCA and LCC using linear programming: An illustrative example of biorefineries. Int J Life Cycle Assess 2019, 24, 2191–2205, doi:10.1007/s11367-019-01650-6.		1
221	Wagening University and Research. Small-scale biorefining; Wagening University and Research, Ed., Wageningen, 2016.							1
222	Bundesministerium für Bildung und Forschung (BMBF) / Federal Ministry of Education and Research (BMBF); Bundesministerium für Ernährung und Landwirtschaft (BMEL) / Federal Ministry of Food and Agriculture (BMEL). Energie aus Biomasse – Neue Wege zur integrierten Bioraffinerie – „BIORAFFINERIE2021“ / Energy from biomass - New paths to an integrated biorefinery - "BIORAFFINERIE2021", 2015. Availabl…							1
223	Shortall, O.K.; Raman, S.; Millar, K. Are plants the new oil?: Responsible innovation, biorefining and multipurpose agriculture. Energy Policy 2015, 86, 360–368, doi:10.1016/j.enpol.2015.07.011.		1
224	Michels, J. Lignocellulose-Bioraffinerie / Lignocellulose biorefinery: Aufschluss lignocellulosehaltiger Rohstoffe und vollständige stoffliche Nutzung der Komponenten (Phase 2) / Digestion of lignocellulosic raw materials and complete material utilisation of the components (phase 2). Final scientific and technical report of all project partners.; DECHEMA e.V., Ed., 2014. Available online: https:/…							1
225	Nishimoto, R. Global trends in the crop protection industry. J. Pestic. Sci. 2019, 44, 141–147, doi:10.1584/jpestics.D19-101.		1
226	Lammens, T., Parisi, C., Ronzon, T., Spekreijse, J., Vis, M. Insights into the European market for bio-based chemicals: Analysis based on 10 key product categories; Publications Office of the European Union, Ed.; EUR 29581 EN; Luxembourg, 2019, ISBN 978-92-79-98420-4, doi:10.2760/673071.		1
227	de Jong, E., Stichnothe, H., Bell, Geoff. Jorgensen, Henning, Bari, I. de, van Haveren, J., Lindorfer, J. Bio-Based Chemicals: A 2020 Update; International Energy Agency (IEA) Bioenergy Task 42, Ed., ISBN 978-1-910154-69-4.							1
228	Motola, V.; Bari, I.D.; Pierro, N.; Giocoli, A. Bioeconomy and biorefining strategies in the EU Member States and beyond: “Monitoring of the Circular BioEconomy in Selected Countries”, on behalf of IEA Bioenergy Task 42 Biorefining; International Energy Agency (IEA) Bioenergy Task 42, Ed., 2018.							1
229	Weinrich, S., Nelles, M. Basics of Anaerobic Digestion - Biochemical Conversion and Process Modelling; Deutsches Biomasseforschungszentrum gemeinnützige GmbH, Ed.; DBFZ Report No. 40; Leipzig, 2021, ISBN 978-3-946629-72-6.							1
230	Kümmerer, K., Schuster, A., Haiß, A., Günther, A., Jacobs, J., Mohring, S., Hamscher, G., Simon, D. Optionen für Biogas-Bestandsanlagen bis 2030 aus ökonomischer und energiewirtschaftlicher Sicht // Umweltrisikobewertung von Zytostatika; Umweltbundesamt (UBA), Ed.; Texte 24/2020; Dessau-Roßlau, 2020.							1
231	O’Keeffe, S.; Thrän, D. Energy Crops in Regional Biogas Systems: An Integrative Spatial LCA to Assess the Influence of Crop Mix and Location on Cultivation GHG Emissions. Sustainability 2020, 12, 237, doi:10.3390/su12010237.		1
232	Pfau, S.F.; Hagens, J.E.; Dankbaar, B. Biogas between renewable energy and bio-economy policies—opportunities and constraints resulting from a dual role. Energy, Sustainability and Society 2017, 7, 16, doi:10.1186/s13705-017-0120-5.		1
233	Daniel-Gromke, J.; Rensberg, N.; Denysenko, V.; Stinner, W.; Schmalfuß, T.; Scheftelowitz, M.; Nelles, M.; Liebetrau, J. Current Developments in Production and Utilization of Biogas and Biomethane in Germany. Chemie Ingenieur Technik 2018, 90, 17–35, doi:10.1002/cite.201700077.		1
234	Theuerl, S.; Herrmann, C.; Heiermann, M.; Grundmann, P.; Landwehr, N.; Kreidenweis, U.; Prochnow, A. The Future Agricultural Biogas Plant in Germany: A Vision. Energies 2019, 12, 396, doi:10.3390/en12030396.		1
235	Thrän, D.; Kjell, A.; Schildhauer, T.; Schipfer, F. Five cornerstones to unlock the potential of flexible bioenergy; International Energy Agency (IEA) Bioenergy Task 44, Ed.; Summary Series, 2021.							1
236	Kleppe, G.; Thrän, D. Biomasse im Spannungsfeld zwischen Energie- und Klimapolitik / Biomass in the field of tension between energy and climate policy: Potenziale - Technologien - Zielkonflikte / Potentials - Technologies - Conflicts of Objectives; Publication Series Energiesysteme der Zukunft, München, 2019.							1
237	Naumann, K.; Müller-Langer, F.; Meisel, K.; Majer, S.; Schröder, J.; Schmieder, U. Weiterentwicklung der deutschen Treibhausgasminderungsquote, Hintergrundpapier/ Further development of the German greenhouse gas reduction quota, background paper; Deutsches Biomasse Forschungs Zentrum (DBFZ), Ed., Leipzig, 2021.							1
238	Bundesministerium für Verkehr und digitale Infrastruktur / Federal Ministry of Transport and Digital Infrastructure. Bericht zum Breitbandatlas - Teil 1: Ergebnisse / Broadband Atlas Report - Part 1: Results; Bundesministerium für Verkehr und digitale Infrastruktur / Federal Ministry of Transport and Digital Infrastructure, Ed., 2020.					1
239	Bundesministerium für Verkehr und digitale Infrastruktur (BMVI) / Federal Ministry of Transport and Digital Infrastructure (BMVI). Aktuelle Breitbandverfügbarkeit in Deutschland (Stand Ende 2020) / Current broadband availability in Germany (as of end 2020), 2020.					1
240	Bundesministerium für Wirtschaft und Energie (BMWi) / Federal Ministry for Economic Affairs and Energy (BMWi). Öffentliche Infrastruktur in Deutschland: Probleme und Reformbedarf / Public Infrastructure in Germany: Problems and Need for Reform, 2020.							1
241	Infrastrukturatlas 2020 / Infrastructure Atlas 2020; Heinrich-Böll-Stiftung / Heinrich Böll Foundation, Ed.; Heinrich-Böll-Stiftung: Berlin, 2020, ISBN 978-3-86928-220-6.							1
242	OECD. The Digitalisation of Science, Technology and Innovation: Key Developments and Policies; OECD Publishing, Ed., Paris, 2020, doi:10.1787/b9e4a2c0-en.		1
243	Burmeister, K.; Fink, A.; Mayer, C.; Schiel, A.; Schulz-Montag, B. Szenario-Report: KI-Basierte Arbeitswelten 2030 / Scenario Report: AI-Based Working Worlds 2030; Fraunhofer IAO, Ed., Stuttgart, 2019.							1
244	Die Energiewende – smart und digital / The energy transition - smart and digital: Beiträge zur FVEE-Jahrestagung 2018 / Contributions to the FVEE Annual Conference 2018, Umweltforum Berlin, 17./18.10., 2018.				1
245	Klitkou, A.; Bozell, J.; Panoutsou, C.; Kuhndt, M.; Kuusisaari, J.; Beckmann, J.P. Bioeconomy and digitalisation: Background paper; Swedish foundation for strategic environmental research (MISTRA), Ed., 2017.							1
246	Homann, J.; Gerpott, T.J.; Briglauer, W.; Vogelsang, I.; Krämer, J.; Henseler-Unger, I.; Wiewiorra, L. Ausbau der digitalen Infrastruktur bis 2025: Welche Wege führen in die ›Gigabit-Gesellschaft‹? / Expansion of the digital infrastructure by 2025: Which paths lead to the 'gigabit society'?; ifo Schnelldienst No. 7, 2018.							1
247	Rehberger, M.; Hiete, M. Allocation of Environmental Impacts in Circular and Cascade Use of Resources—Incentive-Driven Allocation as a Prerequisite for Cascade Persistence. Sustainability 2020, 12, 4366, doi:10.3390/su12114366.		1
248	Olsson, O.; Roos, A.; Guisson, R.; Bruce, L.; Lamers, P.; Hektor, B.; Thrän, D.; Hartley, D.; Ponitka, J.; Hildebrandt, J. Time to tear down the pyramids?: A critique of cascading hierarchies as a policy tool. WIREs Energy Environ. 2018, 7, e279, doi:10.1002/wene.279.		1
249	Toppinen, A.; Mikkilä, M.; Lähtinen, K. ISO 26000 in Corporate Sustainability Practices: A Case Study of the Forest and Energy Companies in Bioeconomy. CSR, Sustainability, Ethics & Governance 2018, 95–113, doi:10.1007/978-3-319-92651-3_7.		1
250	Berg, S.; Kircher, M.; Preschitschek, N.; Bröring, S.; Schurr, U. Die Bioökonomie als Kreislauf- und Verbundsystem / The bioeconomy as a closed-loop and interconnected system. In: Bioökonomie für Einsteiger; Pietzsch, J., Ed.; Springer Berlin Heidelberg: Berlin, Heidelberg, 2017; pp 139–158, ISBN 978-3-662-53763-3.						1
251	Hildebrandt, J.; Bezama, A.; Thrän, D. Cascade use indicators for selected biopolymers: Are we aiming for the right solutions in the design for recycling of bio-based polymers? Waste Manag. Res. 2017, 35, 367–378, doi:10.1177/0734242X16683445.		1
252	Hildebrandt, J.; Bezama, A.; Thrän, D. Analyse alternativer Kaskadennutzungssysteme für lignozellulose-basierte Materialien in der Bioökonomie / Analysis of alternative cascade utilisation systems for lignocellulose-based materials in the bioeconomy. In: ; Bockreis, A., Faulstich, M., Flamme, S., Kranert, M., Mocker, M., Nelles, M., Quicker, P., Rettenberger, G., Rotter, Ed.; Innsbruck University…				1
253	Mair, C.; Stern, T. Cascading Utilization of Wood: A Matter of Circular Economy? Curr Forestry Rep 2017, 3, 281–295, doi:10.1007/s40725-017-0067-y.		1
254	Meyer, R. Bioeconomy Strategies: Contexts, Visions, Guiding Implementation Principles and Resulting Debates. Sustainability 2017, 9, 1031, doi:10.3390/su9061031.		1
255	Höglmeier, K.; Steubing, B.; Weber-Blaschke, G.; Richter, K. LCA-based optimization of wood utilization under special consideration of a cascading use of wood. J. Environ. Manage. 2015, 152, 158–170, doi:10.1016/j.jenvman.2015.01.018.		1
256	Gärtner, S.; Hienz, G.; Keller, H.; Müller-Lindenlauf, M. Gesamtökologische Bewertung der Holznutzungssysteme im Vergleich ("Holzkaskade") / Overall ecological assessment of the wood utilisation systems in comparison ("wood cascade"): Kaskadennutzung von Holz - Umweltauswirkungen stofflicher und energetischer / Cascading use of wood - environmental impacts of material and energy use; ifeu – Insti…							1
257	Fraanje, P.J. Cascading of pine wood. Resources, Conservation and Recycling 1997, 19, 21–28, doi:10.1016/S0921-3449(96)01159-7.		1
258	Sirkin, T.; Houten, M. ten. A Theory and Tool for Achieving Resource Sustainability with Applications for Product Design. Resources, Conservation and Recycling 1994, 213–277.		1
259	Fritsche, U.; Berndes, G.; Cowie, A.L.; Dale, V.H.; Kline, K.L.; Johnson, F.X.; Langeveld, H.; Sharma, N.; Watson, H.; Woods, J. Energy and Land use: Global land outlook. Working Paper; United Nations Convention to Combat Desertficiation (UNCCD); International Renewable Energy Agency IRENA, Eds., 2017.							1
260	Vis, M.; Mantau, U.; Allen, B. Study on the optimised cascading use of wood: No 394/PP/ENT/RCH/14/7689. Final Report, Brüssels, 2016.							1
261	Publications Office of the European Union. Guidance on cascading use of biomass with selected good practice examples on woody biomass; Publications Office of the European Union, Ed., Luxembourg, 2018, doi:10.2873/911487.							1
262	Keegan, D.; Kretschmer, B.; Elbersen, B.; Panoutsou, C. Cascading use: a systematic approach to biomass beyond the energy sector: A systematic approach to biomass beyond the energy sector. Biofuels, Bioprod. Bioref. 2012 // 2013, 7, 193–206, doi:10.1002/bbb.1351.		1
263	Odegard, I.; Croezen, H.; Bergsma, G. Cascading of Biomass: 13 Solutions for a Sustainable Bio-based Economy, Delft, 2012							1
264	Budzinski, M.; Bezama, A.; Thrän, D. Estimating the potentials for reducing the impacts on climate change by increasing the cascade use and extending the lifetime of wood products in Germany. Resources, Conservation & Recycling: X 2020, 6, 100034, doi:10.1016/j.rcrx.2020.100034.		1
265	Neill, A.M.; O’Donoghue, C.; Stout, J.C. A Natural Capital Lens for a Sustainable Bioeconomy: Determining the Unrealised and Unrecognised Services from Nature. Sustainability 2020, 12, 8033, doi:10.3390/su12198033		1
266	Liobikiene, G.; Balezentis, T.; Streimikiene, D.; Chen, X. Evaluation of bioeconomy in the context of strong sustainability. Sustainable Development 2019, 27, 955–964, doi:10.1002/sd.1984.		1
267	PlasticsEurope. Plastics - the Facts 2020: An analysis of European plastics production, demand and waste data, Brussels, 2021.							1
268	Rezvani Ghomi, E.R.; Khosravi, F.; Saedi Ardahaei, A.S.; Dai, Y.; Neisiany, R.E.; Foroughi, F.; Wu, M.; Das, O.; Ramakrishna, S. The Life Cycle Assessment for Polylactic Acid (PLA) to Make It a Low-Carbon Material. Polymers 2021, 13, 1854, doi:10.3390/polym13111854.		1
269	Mazhandu, Z.S.; Muzenda, E.; Mamvura, T.A.; Belaid, M.; Nhubu, T. Integrated and Consolidated Review of Plastic Waste Management and Bio-Based Biodegradable Plastics: Challenges and Opportunities. Sustainability 2020, 12, 8360, doi:10.3390/su12208360.		1
270	Zhang, Z.; Li, Y.; Zhang, J.; Peng, N.; Liang, Y.; Zhao, S. High-Titer Lactic Acid Production by Pediococcus acidilactici PA204 from Corn Stover through Fed-Batch Simultaneous Saccharification and Fermentation. Microorganisms 2020, 8, doi:10.3390/microorganisms8101491.		1
271	Maga, D.; Hiebel, M.; Thonemann, N. Life cycle assessment of recycling options for polylactic acid. Resources, Conservation and Recycling 2019, 149, 86–96, doi:10.1016/j.resconrec.2019.05.018.		1
272	Morão, A.; Bie, F. de. Life Cycle Impact Assessment of Polylactic Acid (PLA) Produced from Sugarcane in Thailand. J Polym Environ 2019, 27, 2523–2539, doi:10.1007/s10924-019-01525-9.		1
273	Castro-Aguirre, E.; Iñiguez-Franco, F.; Samsudin, H.; Fang, X.; Auras, R. Poly(lactic acid)-Mass production, processing, industrial applications, and end of life. Adv. Drug Deliv. Rev. 2016, 107, 333–366, doi:10.1016/j.addr.2016.03.010.		1
274	Murariu, M.; Dubois, P. PLA composites: From production to properties. Adv. Drug Deliv. Rev. 2016, 107, 17–46, doi:10.1016/j.addr.2016.04.003.		1
275	Kenji Sakai; Poudel, P.; Shirai, Y.; Sakai, K. Total Recycle System of Food Waste for Poly-L-Lactic Acid Output. Waste Management Research 2012, 15, 89–96, doi:10.3985/wmr.15.89.		1
276	Jamshidian, M.; Tehrany, E.A.; Imran, M.; Jacquot, M.; Desobry, S. Poly-Lactic Acid: Production, Applications, Nanocomposites, and Release Studies. Compr. Rev. Food Sci. Food Saf. 2010, 9, 552–571, doi:10.1111/j.1541-4337.2010.00126.x.		1
277	Avinc, O.; Khoddami, A. Overview of Poly(lactic acid) (PLA) Fibre. Fibre Chem 2009, 41, 391–401, doi:10.1007/s10692-010-9213-z.		1
278	SAPEA, Science Advice for Policy by European Academie. Biodegradability of plastics in the open environment, Berlin: SAPEA, 2021.		1
279	Wellenreuther, C.; Wolf, A. Innovative feedstocks in biodegradable bio-based plastics: A literature review; Hamburgisches WeltWirtschaftsInstitut (HWWI), Ed.; HWWI Research Paper No. 194, Hamburg, Germany, 2020.							1
280	Bertling, J.; Zimmermann, T.; Rödig, L. Kunststoffe in der Umwelt: Emissionen in landwirtschaftlich genutzte Böden / Plastics in the environment: Emissions into agricultural soils: im Auftrag NABU (Naturschutzbund Deutschland) e. V. / on behalf of NABU (Naturschutzbund Deutschland) e. V.; Fraunhofer UMSICHT, Ed., Oberhausen, Germany, 2021, doi:10.24406/umsicht-n-633611.							1
281	Lokesh, K.; Matharu, A.S.; Kookos, I.K.; Ladakis, D.; Koutinas, A.; Morone, P.; Clark, J. Hybridised sustainability metrics for use in life cycle assessment of bio-based products: Resource efficiency and circularity. Green Chem. 2020, 22, 803–813, doi:10.1039/C9GC02992C.		1
282	Wojnowska-Baryła, I.; Kulikowska, D.; Bernat, K. Effect of Bio-Based Products on Waste Management. Sustainability 2020, 12, 2088, doi:10.3390/su12052088.		1
283	Fachagentur Nachwachsende Rohstoffe e. V. (FNR). Bioplastics: Plants and crops, raw materials, products, Gülzow-Prüzen, 2019.							1
284	Escobar, N.; Haddad, S.; Börner, J.; Britz, W. Land use mediated GHG emissions and spillovers from increased consumption of bioplastics. Environ. Res. Lett. 2018, 13, 125005, doi:10.1088/1748-9326/aaeafb.		1
285	Iwata, T. Biodegradable and bio-based polymers: Future prospects of eco-friendly plastics. Angew. Chem. Int. Ed Engl. 2015, 54, 3210–3215, doi:10.1002/anie.201410770.		1
286	Kwan, T.H.; Hu, Y.; Lin, C.S.K. Techno-economic analysis of a food waste valorisation process for lactic acid, lactide and poly(lactic acid) production. Journal of Cleaner Production 2018, 181, 72–87, doi:10.1016/j.jclepro.2018.01.179.		1
287	Musonda, F.; Millinger, M.; Thrän, D. Greenhouse Gas Abatement Potentials and Economics of Selected Biochemicals in Germany. Sustainability 2020, 12, 2230, doi:10.3390/su12062230.		1
288	Roadmap Chemie 2050 /: Auf dem Weg zu einer treibhausgasneutralen chemischen Industrie in Deutschland : eine Studie von DECHEMA und FutureCamp für den VCI / Towards a greenhouse gas neutral chemical industry in Germany : a study by DECHEMA and FutureCamp for the VCI; Geres, R.; Kohn, A.; Lenz, S.C.; Ausfelder, F.; Bazzanella, A.; Möller, A., Eds.; DECHEMA Gesellschaft für Chemische Technik und Bi…							1
289	Fachagentur Nachwachsende Rohstoffe e.V. (FNR). Bioenergy in Germany Facts and Figures 2020. Available online: https://www.fnr.de/fileadmin/allgemein/pdf/broschueren/broschuere_basisdaten_bioenergie_2020_engl_web.pdf (accessed on 2 December 2021).							1
290	Wu, S.; Song, L.; Sommerfeld, M.; Hu, Q.; Chen, W. Optimization of an effective method for the conversion of crude algal lipids into biodiesel. Fuel 2017, 197, 467–473, doi:10.1016/j.fuel.2017.02.040.		1
291	Fachagentur Nachwachsende Rohstoffe e.V. (FNR). Bioethanol. Available online: https://biokraftstoffe.fnr.de/kraftstoffe/bioethanol (accessed on 2 December 2021).							1
292	Flach, B.; Lieberz, S.; Bolla, S. EU Biofuels Annual 2019; USDA Forgein Agricultural Service, Ed., 2019.							1
293	International Energy Agency (IEA). Renewables 2020 - Analysis and forecast to 2025; International Energy Agency (IEA), Ed., 2020.							1
294	Bundesverband der deutschen Bioethanolwirtschaft e.V. / Federal Association of the German Bioethanol Industry. Umrechnungsformeln für Biokrafstoffe / onversion formulas for biofuels. Available online: https://www.bdbe.de/daten/umrechnung-und-formeln (accessed on 2 December 2021).								1
295	Budzinski, M.; Nitzsche, R. Comparative economic and environmental assessment of four beech wood based biorefinery concepts. Bioresour. Technol. 2016, 216, 613–621, doi:10.1016/j.biortech.2016.05.111.		1
296	Lask, J.; Wagner, M.; Trindade, L.M.; Lewandowski, I. Life cycle assessment of ethanol production from miscanthus: A comparison of production pathways at two European sites. GCB Bioenergy 2019, 11, 269–288, doi:10.1111/gcbb.12551.							1
297	World Population Prospects - Population Division - United Nations. Available online: https://population.un.org/wpp/Graphs/Probabilistic/POP/TOT/900 (accessed on 10 March 2021).								1
298	Dräger de Teran, T.; Suckow, T. So schmeckt Zukunft: Der kulinarische Kompass für eine gesunde Erde / This is how the future tastes: The culinary compass for a healthy earth: Klimaschutz, landwirtschaftliche Fläche und natürliche Lebensräume / Climate protection, agricultural land and natural habitats; World Wide Fund for Nature (WWF) Germany, Ed., 2021.							1
299	Hazen, B.T.; Mollenkopf, D.A.; Wang, Y. Remanufacturing for the Circular Economy: An Examination of Consumer Switching Behavior. Bus. Strat. Env. 2017, 26, 451–464, doi:10.1002/bse.1929.		1
300	Fleischatlas 2021 - Daten und Fakten über Tiere als Nahrungsmittel / Meat Atlas 2021 - Facts and figures about animals as food: Facts and figures about animals as food; Heinrich-Böll-Stiftung; Bund für Umwelt und Naturschutz Deutschland; Le Monde Diplomatique., Eds., 1. Auflage, 2021, ISBN 978-3-86928-224-4.							1
301	Fritsche, U.; Brunori, G.; Chiaramonti, D.; Galanakis, C.M.; Hellweg, S.; Matthews, R.; Panoutsou, C. Future transitions for the Bioeconomy towards Sustainable Development and a Climate-Neutral Economy: Knowledge Synthesis Final Report; Publications Office of the European Union, Ed., 2020, doi:10.2760/667966.							1
302	World Health Organization. Healthy diet. Available online: https://www.who.int/news-room/fact-sheets/detail/healthy-diet (accessed on 4 January 2022).								1
303	Deutsche Gesellschaft für Ernährung e. V. / German Nutrition Society. 10 Regeln der DGE / 10 Rules of the DGE. Available online: https://www.dge.de/ernaehrungspraxis/vollwertige-ernaehrung/10-regeln-der-dge/ (accessed on 2 December 2021).								1
304	Egenolf, V.; Bringezu, S. Conceptualization of an Indicator System for Assessing the Sustainability of the Bioeconomy. Sustainability 2019, 11, 443, doi:10.3390/su11020443.		1
305	Raworth, K. A Doughnut for the Anthropocene: Humanity's compass in the 21st century. The Lancet Planetary Health 2017, 1, e48-e49, doi:10.1016/S2542-5196(17)30028-1.		1
306	Sala, S.; Crenna, E.; Secchi, M.; Sanyé-Mengual, E. Environmental sustainability of European production and consumption assessed against planetary boundaries. J. Environ. Manage. 2020, 269, 110686, doi:10.1016/j.jenvman.2020.110686.		1
307	Statista GmbH. Grad der Urbanisierung in Deutschland /Degree of urbanisation in Germany. Available online: https://de.statista.com/statistik/daten/studie/662560/umfrage/urbanisierung-in-deutschland/#professional (accessed on 29 July 2020).					1
308	Diaz-Chavez, R.; van Dam, J. Novel-regional-and-landscape-based-approaches-to-govern-sustainability-of-bioenergy-and-biomaterials-supply-chains; International Energy Agency (IEA) Bioenergy Task 43, Ed., 2020.							1
309	Bao, K., Padsala, R., Coors, V., Daniela Thrän, Schröter, B. GIS-Based assessment of regional biomass potentials at the example of two counties in Germany, Proceedings of the 28th European Biomass Conference and Exhibition, Virtual, 06-09.07, 2020.				1
310	The value of sustainable urbanization; United Nations Human Settlements Programme; UN Habitat: Nairobi, Kenya, 2020, ISBN 978-92-1-132872-1.							1
311	CIRCE. Key performance indicators to evaluate regional bioeconomies: Deliverable 2.2. POWER4BIO project, 2019.							1
312	Szarka, N.; Wolfbauer, J.; Bezama, A. A systems dynamics approach for supporting regional decisions on the energetic use of regional biomass residues. Waste Manag. Res. 2018, 36, 332–341, doi:10.1177/0734242X18757626.		1
313	Atkinson, C.L. Rural Development. In: Global Encyclopedia of Public Administration, Public Policy, and Governance; Farazmand, A., Ed.; Springer International Publishing: Cham, 2017; pp 1–7, ISBN 978-3-319-31816-5.		1
314	Vale, M.; Stoyanov, M. Regional bioeconomy profiles including socioeconomic and environmental impacts: two case studies: Promoting stakeholder engagement and public awareness for a participative governance of the European bioeconomy. D6.1: Regional bioeconomy profiles including socio-economic and environmental impacts: two case studies; BioStep, Ed., 2017.							1
315	Eppler, U.; Fritsche, U.; Laaks, S. Urban-Rural linkages and global sustainable land use: GLOBALANDS Issue Paper; IINAS International Institute for Sustainability Analysis and Strategy, Ed., 2015.							1
316	Dinarès, M. Urban Metabolism: A review of recent literature on the subject - (Metabolisme urbà: una revisió de la literatura recent sobre el tema). dag 2014, 60, doi:10.5565/rev/dag.134.		1
317	Zhang, Y. Urban metabolism: A review of research methodologies. Environ. Pollut. 2013, 178, 463–473, doi:10.1016/j.envpol.2013.03.052.		1
318	Christen, A.; Coops, N.; Kellett, R.; Crawford, B.; Heyman, E.; Olchovski, I.; Tooke, R.; van der Laan, M. A LiDAR-based urban metabolism approach to neighbourhood scale energy and carbon emissions modelling; University of British Columbia, Ed., 2010.							1
319	Ehrich, S.; Berkenhagen, J.; Ebeling, M. Johann Heinrich von Thünen: Leben und Werk des Namenspatrons des neuen Bundesforschungsinstituts für Ländliche Räume, Wald und Fischerei / Johann Heinrich von Thünen: Life and work of the patron saint of the new Federal Research Institute for Rural Areas,; Johann Heinrich von Thünen-Institut, Ed., Hamburg, 2008, doi:10.3220/Infn55_55-62-2008.		1
320	Braun, J. von. Rural-Urban Linkages for Growth, Employment, and Poverty Reduction: Keynote, Plenary Session 1; Ethiopian Economic Association, Ed., Proceedings of the Fifth International Conference on the Ethiopian Economy, Addis Ababa, 07-09.06., 2007.				1
321	Kennedy, C.; Cuddihy, J.; Engel-Yan, J. The Changing Metabolism of Cities. J. Ind. Ecol. 2007, 11, 43–59, doi:10.1162/jie.2007.1107.		1
322	Rupp, J.; Böhmer, J.; Heinbach, K.; Bluhm, H.; Becker, J.; Dunkelberg, E.; Hirschl, B.; Wagener, F.; Heck, P. Potenzialfelder einer ländlichen Bioökonomie / Potential fields of a rural bioeconomy: Analyse und Bewertung von Wertschöpfungsketten einer nachhaltigen Koppelund Kaskadennutzung von nachwachsenden Rohstoffen / Analysis and evaluation of value chains of a sustainable coupling and cascade …							1
323	Grossauer, F.; Stoeglehner, G. Bioeconomy—Spatial Requirements for Sustainable Development. Sustainability 2020, 12, 1877, doi:10.3390/su12051877		1
324	Statistisches Bundesamt (Destatis) / Federal Statistical Office (Destatis). Umweltökonomische Gesamtrechnungen - Flächenbelegung von Ernährungsgütern tierischen Ursprungs 2010 - 2017 / Environmental-Economic Accounts - Land Use of Food Products of Animal Origin 2010 - 2017, 2019.					1
325	Bundesministerium für Ernährung und Landwirtschaft (BMEL) / Federal Ministry of Food and Agriculture (BMEL). Fachserie 3, Reihe 3.1.2, Reihe 3.1.3 und Reihe 3.2.1; BMEL (723) / Subject-matter series 3, series 3.1.2, series 3.1.3 and series 3.2.1; BMEL (723) (accessed on 12 January 2022).					1
326	Umweltbundesamt (UBA) / Federal Environment Agency. Wasserressourcen und ihre Nutzung / Water resources and their use. Available online: https://www.umweltbundesamt.de/daten/wasser/wasserressourcen-ihre-nutzung#die-wassernutzer (accessed on 12 January 2022).					1
327	Umweltbundesamt (UBA) / Federal Environment Agency. Pflanzenschutzmittelverwendung in der Landwirtschaft / Use of plant protection products in agriculture (accessed on 12 January 2022)					1
328	Bundesministerium für Bildung und Forschung (BMBF) / Federal Ministry of Education and Research (BMBF). Meldungsarchiv - Strukturdaten zum Ökologischen Landbau in Deutschland / Reporting archive - Structural data on organic farming in Germany. Available online: https://www.ble.de/DE/Themen/Landwirtschaft/Oekologischer-Landbau/_functions/StrukturdatenOekolandbau_table.html?nn=8903860 (accessed on …					1
			152	8	7	27	6	119	9	328

## Sheet: D1 Biogenic residues
ID	Source	Reviewed with DOI	University publication	Proceedings	Databases/Statistical Office	Books	Project Reports/Discussion Paper	Webpage
1	DBFZ Webapp | Rohstoffdatenbank. Available online: https://webapp.dbfz.de/resource-database/?lang=de (accessed on 15 April 2021).				1
2	Brosowski, A.; Bill, R.; Thrän, D. Temporal and spatial availability of cereal straw in Germany—Case study: Biomethane for the transport sector. Energy, Sustainability and Society 2020, 10, 1712, doi:10.1186/s13705-020-00274-1.	1
3	Krause, T.; Pohl, M.; Klemm, M.; Wirth, B.; Gröngröft, A.; Müller-Langer, F.; Hartmann, I.; Radtke, K.S.; Thrän, D.; Brosowski, A. Nationales Monitoring biogener Reststoffe, Nebenprodukte und Abfälle in Deutschland Teil 2: Rohstoffeigenschaften und Konversionsfaktoren. Open Agrar Repositorium 2020, doi:10.48480/EGCS-T204.	1
4	Andreola, F.; Lancellotti, I.; Manfredini, T.; Barbieri, L. The circular economy of agro and post‐consumer residues as raw materials for sustainable ceramics. Int J Appl Ceram Technol 2019, 17, 22–31, doi:10.1111/ijac.13396.	1
5	Tsui, T.-H.; Wong, J.W.C. A critical review: Emerging bioeconomy and waste-to-energy technologies for sustainable municipal solid waste management. Waste Dispos. Sustain. Energy 2019, 1, 151–167, doi:10.1007/s42768-019-00013-z.	1
6	Brosowski, A.; Thrän, D.; Mantau, U.; Mahro, B.; Erdmann, G.; Adler, P.; Stinner, W.; Reinhold, G.; Hering, T.; Blanke, C. A review of biomass potential and current utilisation – Status quo for 93 biogenic wastes and residues in Germany. Biomass and Bioenergy 2016, 95, 257–272, doi:10.1016/j.biombioe.2016.10.017.	1
7	Nelles, M.; Grünes, J.; Morscheck, G. Waste Management in Germany – Development to a Sustainable Circular Economy? Procedia Environmental Sciences 2016, 35, 6–14, doi:10.1016/j.proenv.2016.07.001.	1
8	Brosowski, A.; Krause, T.; Mantau, U.; Mahro, B.; Noke, A.; Richter, F.; Raussen, T.; Bischof, R.; Hering, T.; Blanke, C.; et al. Arbeitsgruppe Biomassereststoffmonitoring (AG BioRestMon): Schlussbericht; Deutsches Biomasseforschungszentrum gGmbH, Ed., Leipzig, 2019.						1
9	Krause, T.; Mantau, U.; Mahro, B.; Noke, A.; Richter, F.; Raussen, T.; Bischof, R.; Hering, T.; Thrän, D.; Brosowski, A. Nationales Monitoring biogener Reststoffe, Nebenprodukte und Abfälle in Deutschland Teil 1: Basisdaten zu Biomassepotenzialen. Open Agrar Repositorium 2020, doi:10.48480/6MZ1-ZS78.	1
10	Brosowski, A.; Krause, T.; Mantau, U.; Mahro, B.; Noke, A.; Richter, F.; Raussen, T.; Bischof, R.; Hering, T.; Blanke, C.; et al. How to measure the impact of biogenic residues, wastes and by-products: Development of a national resource monitoring based on the example of Germany. Biomass and Bioenergy 2019, 127, 105275, doi:10.1016/j.biombioe.2019.105275	1
		8	0	0	1	0	1	0	10

## Sheet: D2 Urban agriculture
ID	Source	Reviewed with DOI	University publication	Proceedings	Databases/Statistical Office	Books	Project Reports/Discussion Paper	Webpage
1	Bundesanstalt für Landwirtschaft und Ernährung (BMEL). Obst, Gemüse, Zitrusfrüchte, Schalen- und Trockenobst. Available online: https://www.bmel-statistik.de/ernaehrung-fischerei/versorgungsbilanzen/obst-gemuese-zitrusfruechte-schalen-und-trockenobst/ (accessed on 2 December 2021).				1
2	Dietl, A. Wie Städte von urbaner Landwirtschaft profitieren können: eine Typologie, Nachhaltigkeitsanalyse und Ökobilanzierung gängiger urbaner Anbauformen, mit Fallbeispielen aus Wien; Social Ecology Working Paper No. 186, 2020.						1
3	Edmondson, J.L.; Cunningham, H.; Densley Tingley, D.O.; Dobson, M.C.; Grafius, D.R.; Leake, J.R.; McHugh, N.; Nickles, J.; Phoenix, G.K.; Ryan, A.J.; et al. The hidden potential of urban horticulture. Nature Food 2020, 1, 155–159, doi:10.1038/s43016-020-0045-6.	1
4	Peña, A.; Rovira-Val, M.R. A longitudinal literature review of life cycle costing applied to urban agriculture. Int J Life Cycle Assess 2020, 25, 1418–1435, doi:10.1007/s11367-020-01768-y.	1
5	Pulighe, G.; Lupia, F. Food First: COVID-19 Outbreak and Cities Lockdown a Booster for a Wider Vision on Urban Agriculture. Sustainability 2020, 12, 5012, doi:10.3390/su12125012.	1
6	Skar, S.L.G.; Pineda-Martos, R.; Timpe, A.; Pölling, B.; Bohn, K.; Külvik, M.; Delgado, C.; Pedras, C.M.G.; Paço, T.A.; Ćujić, M.; et al. Urban agriculture as a keystone contribution towards securing sustainable and healthy development for cities in the future. Blue-Green Systems 2020, 2, 1–27, doi:10.2166/bgs.2019.931.	1
7	Armanda, D.T.; Guinée, J.B.; Tukker, A. The second green revolution: Innovative urban agriculture's contribution to food security and sustainability – A review. Global Food Security 2019, 22, 13–24, doi:10.1016/j.gfs.2019.08.002.	1
8	McDougall, R.; Kristiansen, P.; Rader, R. Small-scale urban agriculture results in high yields but requires judicious management of inputs to achieve sustainability. Proc. Natl. Acad. Sci. U. S. A. 2019, 116, 129–134, doi:10.1073/pnas.1809707115.	1
9	Scharf, N.; Wachtel, T.; Reddy, S.; Säumel, I. Urban Commons for the Edible City—First Insights for Future Sustainable Urban Food Systems from Berlin, Germany. Sustainability 2019, 11, 966, doi:10.3390/su11040966.	1
10	Winkler, B.; Maier, A.; Lewandowski, I. Urban Gardening in Germany: Cultivating a Sustainable Lifestyle for the Societal Transition to a Bioeconomy. Sustainability 2019, 11, 801, doi:10.3390/su11030801.	1
11	Hoops, G.P.; Olshansky, H.P.; Tavares, J.; Rosen, R. Copenhagen's Case for Urban Farming: A Feasibility Study; Worcester Polytechnic Institute, Ed., 2018 (accessed on 9 November 2020).		1
12	Padilla, M.; Mok, S.; Raj, H.; Latypov, V.; Bescansa, M. Urban farming in the city of tomorrow: Assessing the global landscape on urban food and resource production with the focus on indoor plant and mircoalgae cultivation; Frauenhofer Institute for industrial engineering IAO, Ed., Stuttgart, 2018. Available online: http://publica.fraunhofer.de/dokumente/N-506944.html (accessed on 30 November 202…						1
13	Petit-Boix, A.; Apul, D. From Cascade to Bottom-Up Ecosystem Services Model: How Does Social Cohesion Emerge from Urban Agriculture? Sustainability 2018, 10, 998, doi:10.3390/su10040998.	1
14	Boyer, D.; Ramaswami, A. What Is the Contribution of City-Scale Actions to the Overall Food System's Environmental Impacts?: Assessing Water, Greenhouse Gas, and Land Impacts of Future Urban Food Scenarios. Environ. Sci. Technol. 2017, 51, 12035–12045, doi:10.1021/acs.est.7b03176.	1
15	Brandt, M.; Gärtner, S.; Meyer, K. Urbane Produktion: Ein Versuch einer Begriffsdefinition; Institut Arbeit und Technik (IAT), Ed.; Forschung Aktuell No. 08/2017, Gelsenkirchen, 2017. Available online: http://nbn-resolving.de/urn:nbn:de:0176-201708014 (accessed on 9 November 2020).						1
16	Parece, T.E.; Campbell, J.B. Assessing Urban Community Gardens’ Impact on Net Primary Production using NDVI. Urban agric. region. food syst. 2017, 2, 1–17, doi:10.2134/urbanag2016.07.0004.	1
17	Pölling, B.; Prados, M.-J.; Torquati, B.M.; Giacchè, G.; Recasens, X.; Paffarini, C.; Alfranca, O.; Lorleberg, W. Business models in urban farming: A comparative analysis of case studies from Spain, Italy and Germany. Moravian Geographical Reports 2017, 25, 166–180, doi:10.1515/mgr-2017-0015.	1
18	Pölling, B. Comparison of Farm Structures, Success Factors, Obstacles, Clients’ Expectations and Policy Wishes of Urban Farming’s Main Business Models in North Rhine-Westphalia, Germany. Sustainability 2016, 8, 446, doi:10.3390/su8050446.	1
19	Schmidt, D. Die Rolle der urbanen Landwirtschaft in der Stadtentwicklung: Übersicht und Umgang mit neuen Formen anhand von Fallbeispielen. Masterarbeit; Technische Universität Dresden, Dresden, 2016.		1
20	McClintock, N.; Cooper, J.; Khandeshi, S. Assessing the potential contribution of vacant land to urban vegetable production and consumption in Oakland, California. Landscape and Urban Planning 2013, 111, 46–58, doi:10.1016/j.landurbplan.2012.12.009.	1
21	Schulz, K.; Weith, T.; Bokelmann, W.; Petzke, N. Urbane Landwirtschaft und „Green Production“ als Teil eines nachhaltigen Landmanagements; Leibniz‐Zentrum für Agrarlandschaftsforschung (ZALF) e.V., Ed.; Diskussionspapies No. 6, Müncheberg, 2013.						1
22	Fox-Kämper, R.; Lelong, B.; Sondermann, M. Urbane Garten als Teil grüner Infrastrukturen. Raumplanung 2015, 180.	1
23	Ehrmann, A. On the Possible Use of Textile Fabrics for Vertical Farming. TEK 2019, 62, 34–41, doi:10.14502/Tekstilec2019.62.34-41.	1
24	Specht, K.; Zoll, F.; Schümann, H.; Bela, J.; Kachel, J.; Robischon, M. How Will We Eat and Produce in the Cities of the Future?: From Edible Insects to Vertical Farming—A Study on the Perception and Acceptability of New Approaches. Sustainability 2019, 11, 4315, doi:10.3390/su11164315.	1
25	Deutsches Zentrum für Luft- und Raumfahrt e.V. (DLR). Vertical Farm 2.0: Designing an Economically Feasible Vertical Farm – A combined European Endeavor for Sustainable Urban Agriculture, Bremen, 2015.						1
26	Adenaeuer, L.; Banerjee, C. Up, Up and Away!: The Economics of Vertical Farming. Journal of Agriculture Studies 2014, 2, 40–60, doi:10.5296/jas.v2i1.4526.	1
27	Deutsche Bundesregierung. Future City: Urbane Landwirtschaft. Drucksachen 19/15245 2019.						1
28	Association for Vertical Farming. Controlled Agriculture & Ecosystem Economies, 2017.						1
29	Al-Kodmany, K. The Vertical Farm: A Review of Developments and Implications for the Vertical City // The Vertical Farm: A Review of Developments and Implications for the Vertical City. Buildings 2018, 8, 24, doi:10.3390/buildings8020024.	1
30	van Hemelryck, S.; Adibi, N.; Roels, S.; Voorend, W. Life Cycle Assessment of Vertical Farming: Application for Basil Production in Colruyt Group Prototype Farm; 12th International Conference on Life Cycle Assessment of Food 2020 (LCA Food 2020) “Towards Sustainable Agri-Food Systems”, Berlin, 2020.			1
31	Martin, M.; Molin, E. Environmental Assessment of an Urban Vertical Hydroponic Farming System in Sweden. Sustainability 2019, 11, 4124, doi:10.3390/su11154124.	1
32	Hallikainen, E. Life Cycle Assessment on Vertical Farming. Master of Science; School of Engineering, Helsinki, 2018.		1
33	Sanyé-Mengual, E.; Oliver-Solà, J.; Montero, J.I.; Rieradevall, J. An environmental and economic life cycle assessment of Rooftop Greenhouse (RTG) implementation in Barcelona, Spain. // An environmental and economic life cycle assessment of rooftop greenhouse (RTG) implementation in Barcelona, Spain. Assessing new forms of urban agriculture from the greenhouse structure to the final product level…	1
34	Endreny, T.A. Strategically growing the urban forest will improve our world. Nat. Commun. 2018, 9, 1160, doi:10.1038/s41467-018-03622-0.	1
35	Pütz, M.; Schmid, S.; Bernasconi, A.; Wolf, B. Urban Forestry: Definition, Trends und Folgerungen für die Waldakteure in der Schweiz. Schweizerische Zeitschrift fur Forstwesen 2015, 166, 230–237, doi:10.3188/szf.2015.0230.	1
36	Walsh, A.J. Potential Urban Forest Carbon Sequestration and Storage Capacities in Burnside Industrial Park, Nova Scotia. Master of Environmental Studies; Dalhousie University, Halifax, Nova Scotia, 2012.		1
37	Mehhdi, R.; Johari, M.Y.M.; Afshin, S. Terminology of Urban Open and Green Spaces: Conference Paper · November 2017 2017.			1
38	Cvejić, R.; Eler, K.; Pintar, M.; (UL, Š.Ž.; Slovenia); Haase, D.; Kabisch, N.; Strohbach, M. A Typology of Urban Green Spaces, Eco-Sysem services provisioning services and demands: Report: D3.1. GREEN SURGE project 2015.	1
39	Brasseur, G., Jacob, D., Schuck-Zöller, S. Klimawandel in Deutschland: Entwicklung, Folgen, Risiken und Perspektiven; Springer Spektrum: Berlin, 2017, ISBN 978-3-662-50397-3, doi:10.1007/978-3-662-50397-3.	1
40	Umweltbundesamt (UBA). Daten zur Umwelt - Umweltmonitor 2020; Umweltbundesamt (UBA), Ed., Dessau-Roßlau, 2021.				1
41	Statistisches Bundesamt (Destatis). Bevölkerung im Wandel: Annahmen und Ergebnisse der 14. koordinierten Bevölkerungsvorausberechnung, Wiesbaden, 2019.				1
42	Statista Inc. Germany: Urbanization from 2010 to 2020. Available online: https://www.statista.com/statistics/455825/urbanization-in-germany/ (accessed on 2 December 2021).				1
		25	4	2	4	0	7	0	42

## Sheet: D3 Degraded and unused areas
ID	Source	Reviewed with DOI	University publication	Proceedings	Databases/Statistical Office	Books	Project Reports/Discussion Paper	Webpage
1	Gerwin, W.; Repmann, F.; Galatsidas, S.; Vlachaki, D.; Gounaris, N.; Baumgarten, W.; Volkmann, C.; Keramitzis, D.; Kiourtsis, F.; Freese, D. Assessment and quantification of marginal lands for biomass production in Europe using soil-quality indicators. SOIL 2018, 4, 267–290, doi:10.5194/soil-4-267-2018.	1
2	Krieg, R. Nachhaltige Biomasse von marginalen Flächen. Available online: https://herd-und-hof.de/landwirtschaft-/nachhaltige-biomasse-von-marginalen-flaechen.html (accessed on 29 April 2021).							1
3	Soil Health and Intensification of Agroecosytems; Elsevier, 2017, ISBN 9780128053171.					1
4	Hendrickson, J.; Sanderson, M. Perennial-Based Agricultural Systems and Livestock Impact on Soil and Ecological Services. Soil Health and Intensification of Agroecosytems; Elsevier, 2017; pp 151–171, ISBN 9780128053171.					1
5	Alois Heißhuber, Wolfgang Haber, Christine Krämer. Umweltprobleme der Landwirtschaft; Umweltbundesamt (UBA), Ed.; Texte No. 28/2015, Dessau-Roßlau, 2015.						1
6	Kang, S.; Post, W.M.; Nichols, J.A.; Wang, D.; West, T.O.; Bandaru, V.; Izaurralde, R.C. Marginal Lands: Concept, Assessment and Management. Journal of Agricultural Science 2013, 5, doi:10.5539/jas.v5n5p129.	1
7	Shahid, S.A.; Al-Shankiti, A. Sustainable food production in marginal lands—Case of GDLA member countries. International Soil and Water Conservation Research 2013, 1, 24–38, doi:10.1016/S2095-6339(15)30047-2.	1
8	Farwick, J.; Berg, E. Aufrechterhaltung einer flächendeckenden Landbewirtschaftung in Nordrhein-Westfalen bei zunehmender Entkopplung; Landwirtschaftliche Fakultät der Universität Bonn, Ed.; Schriftenreihe des Lehr- und Forschungsschwerpunktes USL, No. 165, 2011.						1
9	Tilman, D.; Hill, J.; Lehman, C. Carbon-negative biofuels from low-input high-diversity grassland biomass. Science 2006, 314, 1598–1600, doi:10.1126/science.1133306.	1
10	Ivanina, V. Sustainable exploitation of biomass for bioenergyfrom marginal lands in Europe: Report of general understanding of MagL, 2016.						1
11	Pancaldi, F.; Trindade, L.M. Marginal Lands to Grow Novel Bio-Based Crops: A Plant Breeding Perspective. Front. Plant Sci. 2020, 11, 227, doi:10.3389/fpls.2020.00227.	1
12	Umweltbundesamt (UBA). Flächenrecycling und Innenentwicklung. Available online: https://www.umweltbundesamt.de/themen/boden-landwirtschaft/flaechensparen-boeden-landschaften-erhalten/flaechenrecycling-innenentwicklung#brachen-nutzen-grune-wiesen-schonen (accessed on 2 December 2021).				1
13	Handwörterbuch der Stadt- und Raumentwicklung; Akademie für Raumforschung und Landesplanung, Ed.; Akademie für Raumforschung und Landesplanung: Hannover, 2018, ISBN 978-3-88838-559-9.					1
14	Brachflächen im Spannungsfeld zwischen Naturschutz und (baulicher) Wiedernutzung; Rieke Hansen; Heidebach, M.; Kuchler, F.; Pauleit, S., Eds.; BfN-Skripten No. 324; Bundesamt für Naturschutz BfN: Bonn, 2012, ISBN 9783896240590.						1
15	Flächennutzung: Flächennutzung. Available online: https://www.destatis.de/DE/Themen/Branchen-Unternehmen/Landwirtschaft-Forstwirtschaft-Fischerei/Flaechennutzung/_inhalt.html (accessed on 9 November 2020).				1
16	NABU (Naturschutzbund Deutschland) e. V. Nachhaltige Siedlungsentwicklung: Das NABU-Grundsatzprogramm zum Planen und Bauen in Deutschland; NABU (Naturschutzbund Deutschland) e. V., Ed., Berlin, 2020.						1
17	Schubert, S.; Bunge, C.; Gellrich, A.; Schlippenbach, U.v.; Reißmann, D. Innenentwicklung in städtischen Quartieren: Die Bedeutung von Umweltqualität, Gesundheit und Sozialverträglichkeit; Umweltbundesamt (UBA), Ed., Dessau-Roßlau, 2019.						1
18	Trends der Siedlungsflächenentwicklung: Status quo und Projektion 2030; Hoymann, J.; Dosch, F.; Beckmann, G., Eds.; BBSR-Analysen kompakt No. 9; Bundesinst. für Bau- Stadt- und Raumforschung: Bonn, 2012, ISBN 978-3-87994-705-8.						1
19	Pauleit, S.; Hansen, R. Stadtbrachen als Chance: Perspektiven für mehr Grün den Städten; Bundesamt für Naturschutz (BfN), Ed., 2016.						1
25	Jering, A.; Klatt, A.; Seven, J.; Ehlers, K.; Günther, J.; Ostermeier, A.; Mönch, L. Globale Landflächen und Biomasse - nachhaltig und ressourcenschonend nutzen; Umweltbundesamt (UBA), Ed., 2013.						1
26	Rößler, S.; Mathey, J. Brachfläche, Konversionsfläche. In: Handwörterbuch der Stadt- und Raumentwicklung; Akademie für Raumforschung und Landesplanung, Ed.; Akademie für Raumforschung und Landesplanung: Hannover, 2018; pp 295–305, ISBN 978-3-88838-559-9						1
		5	0	0	2	3	10	1	21

## Sheet: D4 Algae
ID	Source	Reviewed with DOI	University publication	Proceedings	Databases/Statistical Office	Books	Project Reports/Discussion Paper	Webpage
1	Al-Jabri, H.; Das, P.; Khan, S.; Thaher, M.; AbdulQuadir, M. Treatment of Wastewaters by Microalgae and the Potential Applications of the Produced Biomass—A Review. Water 2021, 13, 27, doi:10.3390/w13010027.	1
2	Abedi, E.; Hashemi, S.M.B. Lactic acid production - producing microorganisms and substrates sources-state of art. Heliyon 2020, 6, e04974, doi:10.1016/j.heliyon.2020.e04974.	1
3	Bussa, M.; Zollfrank, C.; Röder, H. Life-cycle assessment and geospatial analysis of integrating microalgae cultivation into a regional economy. Journal of Cleaner Production 2020, 243, 118630, doi:10.1016/j.jclepro.2019.118630.	1
4	Eisen, A.; Bussa, M.; Röder, H. A review of environmental assessments of biobased against petrochemical adhesives. Journal of Cleaner Production 2020, 277, 124277, doi:10.1016/j.jclepro.2020.124277.	1
5	Li, G.; Lu, Z.; Zhang, J.; Li, H.; Zhou, Y.; Mohammed Ibrahim Zayan, A.; Huang, Z. Life cycle assessment of biofuel production from microalgae cultivated in anaerobic digested wastewater. International Journal of Agricultural and Biological Engineering 2020, 13, 241–246, doi:10.25165/j.ijabe.20201301.4178.	1
6	Onen Cinar, S.; Chong, Z.K.; Kucuker, M.A.; Wieczorek, N.; Cengiz, U.; Kuchta, K. Bioplastic Production from Microalgae: A Review. Int. J. Environ. Res. Public Health 2020, 17, doi:10.3390/ijerph17113842.	1
7	Bussa, M.; Eisen, A.; Zollfrank, C.; Röder, H. Life cycle assessment of microalgae products: State of the art and their potential for the production of polylactid acid. Journal of Cleaner Production 2019, 213, 1299–1312, doi:10.1016/j.jclepro.2018.12.048.	1
8	Schröter-Schlaack, C.; Aicher, C.; Grünwald, R.; Revermann, C.; Schiller, J. Das Potenzial algenbasierter Kraftstoffe für den Lkw-Verkehr: Sachstandsbericht zum Monitoring »Nachhaltige Potenziale der Bioökonomie – Biokraftstoffe der 3. Generation«; Büro für Technikfolgen-Abschätzung beim Deutschen Bundestag (TAB), Ed.; TAB Arbeitsbericht No. 181, Berlin, 2019.						1
9	Wollmann, F.; Dietze, S.; Ackermann, J.-U.; Bley, T.; Walther, T.; Steingroewer, J.; Krujatz, F. Microalgae wastewater treatment: Biological and technological approaches. Eng. Life Sci. 2019, 19, 860–871, doi:10.1002/elsc.201900071.	1
10	Padilla, M.; Mok, S.; Raj, H.; Latypov, V.; Bescansa, M. Urban farming in the city of tomorrow: Assessing the global landscape on urban food and resource production with the focus on indoor plant and mircoalgae cultivation; Frauenhofer Institute for industrial engineering IAO, Ed., Stuttgart, 2018. Available online: http://publica.fraunhofer.de/dokumente/N-506944.html (accessed on 30 November 202…						1
11	Skarka, J. Potenziale zur Erzeugung von Biomasse aus Mikroalgen in Europa unter besonderer Berücksichtigung der Flächen- und CO2-Verfügbarkeit. Dissertation; Karlsruher Institut für Technologie, Karlsruhe, 2015, doi:10.5445/IR/1000046930.	1
12	Driver, T.; Bajhaiya, A.; Pittman, J.K. Potential of Bioenergy Production from Microalgae. Curr Sustainable Renewable Energy Rep 2014, 1, 94–103, doi:10.1007/s40518-014-0011-8.	1
13	Gendy, T.S.; El-Temtamy, S.A. Commercialization potential aspects of microalgae for biofuel production: An overview. Egyptian Journal of Petroleum 2013, 22, 43–51, doi:10.1016/j.ejpe.2012.07.001.	1
14	Hempel, N. Biodieselproduktion aus Mikroalgen. Dissertation; Technischen Universität Berlin, Berlin, 2013.		1
15	Slade, R.; Bauen, A. Micro-algae cultivation for biofuels: Cost, energy balance, environmental impacts and future prospects. Biomass and Bioenergy 2013, 53, 29–38, doi:10.1016/j.biombioe.2012.12.019.	1
16	Nguyen, C.M.; Kim, J.-S.; Song, J.K.; Choi, G.J.; Choi, Y.H.; Jang, K.S.; Kim, J.-C. D-lactic acid production from dry biomass of Hydrodictyon reticulatum by simultaneous saccharification and co-fermentation using Lactobacillus coryniformis subsp. torquens. Biotechnol. Lett. 2012, 34, 2235–2240, doi:10.1007/s10529-012-1023-3.	1
17	Collet, P.; Hélias, A.; Lardon, L.; Ras, M.; Goy, R.-A.; Steyer, J.-P. Life-cycle assessment of microalgae culture coupled to biogas production. Bioresour. Technol. 2011, 102, 207–214, doi:10.1016/j.biortech.2010.06.154.	1
18	Weinberger, F.; Paalme, T.; Wikström, S.A. Seaweed resources of the Baltic Sea, Kattegat and German and Danish North Sea coasts. Botanica Marina 2020, 63, 61–72, doi:10.1515/bot-2019-0019.	1
19	Balina, K.; Romagnoli, F.; Blumberga, D. Seaweed biorefinery concept for sustainable use of marine resources. Energy Procedia 2017, 128, 504–511, doi:10.1016/j.egypro.2017.09.067.		1
		15	2	0	0	0	2	0	19

## Sheet: D5 Perennial Production systems
ID	Source	Reviewed with DOI	University publication	Proceedings	Databases/Statistical Office	Books	Project Reports/Discussion Paper	Webpage
1	Englund, O.; Börjesson, P.; Berndes, G.; Scarlat, N.; Dallemand, J.-F.; Grizzetti, B.; Dimitriou, I.; Mola-Yudego, B.; Fahl, F. Beneficial land use change: Strategic expansion of new biomass plantations can reduce environmental impacts from EU agriculture. Global Environmental Change 2020, 60, 101990, doi:10.1016/j.gloenvcha.2019.101990.	1
2	Shepherd, A.; Clifton‐Brown, J.; Kam, J.; Buckby, S.; Hastings, A. Commercial experience with miscanthus crops: Establishment, yields and environmental observations. GCB Bioenergy 2020, 12, 510–523, doi:10.1111/gcbb.12690.	1
3	Cossel, M.v.; Mangold, A.; Iqbal, Y.; Hartung, J.; Lewandowski, I.; Kiesel, A. How to Generate Yield in the First Year—A Three-Year Experiment on Miscanthus (Miscanthus × giganteus (Greef et Deuter)) Establishment under Maize (Zea mays L.). Agronomy 2019, 9, 237, doi:10.3390/agronomy9050237.	1
4	Wagner, M.; Mangold, A.; Lask, J.; Petig, E.; Kiesel, A.; Lewandowski, I. Economic and environmental performance of miscanthus cultivated on marginal land for biogas production. GCB Bioenergy 2019, 11, 34–49, doi:10.1111/gcbb.12567.	1
5	Dimitriou, I.; Rutz, D. Sustainable short rotation coppice: A handbook; WIP Renewable Energies: Munich, 2015, ISBN 978-3-936338-36-2.						1
6	Keller, H.; Rettenmaier, N.; Reinhardt, G. Integrated sustainability assessment of bioenergy and bio-based products from perennial grasses cultivated on marginal land: In: OPTIMA project reports, supported by the EU's FP7 under GA no. 289642, Heidelberg, Germany, 2015.						1
7	University of Goettingen. SIGNAL - Research on innovative agroforestry systems. Available online: http://www.signal.uni-goettingen.de/home/central-objective/ (accessed on 7 January 2022).							1
8	Becker, A.; Peters, D.; Kemnitz, D. Anbau und Verwendung nachwachsender Rohstoffe in Deutschland; Fachagentur Nachwachsende Rohstoffe e. V. (FNR), Ed., 2021.						1
9	Damianidis, C.; Santiago-Freijanes, J.J.; den Herder, M.; Burgess, P.; Mosquera-Losada, M.R.; Graves, A.; Papadopoulos, A.; Pisanelli, A.; Camilli, F.; Rois-Díaz, M.; et al. Agroforestry as a sustainable land use option to reduce wildfires risk in European Mediterranean areas. Agroforest Syst 2020, 17, 274, doi:10.1007/s10457-020-00482-w.	1
10	Pancaldi, F.; Trindade, L.M. Marginal Lands to Grow Novel Bio-Based Crops: A Plant Breeding Perspective. Front. Plant Sci. 2020, 11, 227, doi:10.3389/fpls.2020.00227.	1
11	Böhm, C., Nawroth, G., Warth, P. Roadmap Agroforstwirtschaft: Bäume als Bereicherung für landwirtschaftliche Flächen in Deutschland; Frauenhofer Institut für Arbeitswissenschaft und Organisation (IAO), Ed., 2019, ISBN 978-3-8396-1491-4.						1
12	Kröber, M. Kurzumtriebsplantagen auf Ackerland – ökonomische Bewertung einer Anbauoption mit ökologischen Vorteilen am Beispiel des Freistaats Sachsen. Dissertation; Martin‐Luther‐Universität Halle‐Wittenberg, 2018.
13	Dauber, J.; Miyake, S. To integrate or to segregate food crop and energy crop cultivation at the landscape scale?: Perspectives on biodiversity conservation in agriculture in Europe. Energ Sustain Soc 2016, 6, 1729, doi:10.1186/s13705-016-0089-5.	1
14	Kanzler, M.; Böhm, C. Nachhaltige Erzeugung von Energieholz in Agroforstsystemen (AgroForstEnergie II); Brandenburgische Technische Universität Cottbus-Senftenberg, Ed., 2015.						1
15	Dauber, J.; Bolte, A. Bioenergy: Challenge or support for the conservation of biodiversity? GCB Bioenergy 2014, 6, 180–182, doi:10.1111/gcbb.12188.						1
16	Aust, C. Abschätzung der nationalen und regionalen Biomassepotentiale von Kurzumtriebsplantagen auf landwirtschaftlichen Flächen in Deutschland. Dissertation; Albert-Ludwigs-Universität Freiburg i. Brsg., Freiburg, 2012.		1
17	Dauber, J.; Brown, C.; Fernando, A.L.; Finnan, J.; Krasuska, E.; Ponitka, J.; Styles, D.; Thrän, D.; van Groenigen, K.J.; Weih, M.; et al. Bioenergy from “surplus” land: Environmental and socio-economic implications. BR 2012, 7, 5–50, doi:10.3897/biorisk.7.3036.	1
18	Rois, M.; Michael den Herder; Paulo, J.A.; Tomás, A. Agroforestry contribute to circular bioeconomy: European Union's Horizon 2020 reserach and innovation programm under grant agreement NO 727872; Agroforestry innovation network, Ed., 2019.						1
19	Wolfe, M. Agroforestry and decentralised food and energy production: Produced by the AGFORWARD research project funded by the European Union’s Seventh Framework Programme for research, technological development and demonstration under grant agreement No 613520, 2017.						1
20	Bäume als Bereicherung für landwirtschaftliche Flächen: Ein Innovationskonzept für die verstärkte Umsetzung der Agroforstwirtschaft in Deutschland. „Innovationsgruppe AUFWERTEN – Agroforstliche Umweltleistungen Für; Böhm, C.; Hübner, R., Eds.; Cottbus, 2020, ISBN 978-3-00-064735-2.						1
21	Hochschule für nachhaltige Entwicklung Eberswalde. Konzeption eines Agroforst-Modellvorhabens für das Löwenberger Land (Brandenburg); Hochschule für nachhaltige Entwicklung Eberswalde, Ed., 2017.						1
22	Lamerre, J.; Langhof, M.; Sevke-Masur, K.; Schwarz, K.-U.; Wühlisch, G.v.; Swieter, A.; Greef, J.M.; Dauber, J.; Hirschberg, F.; Joormann, I.; et al. Nachhaltige Erzeugung von Energieholz in Agroforstsystemen: Teilprojekt 3: Standort Niedersachsen; Strukturvielfalt und Biodiversität. Schlussbericht; ulius Kühn-Institut Bundesforschungsinstitut für Kulturpflanzen (JKI) – Institut für Pflanzenbau u…						1
23	Michael den Herder; Moreno, G.; Mosquera-Losada, R.; Palma, J.; Sidiropoulou, A.; Freijanes, J.J.S.; Crous-Duran, J.; Paulo, J.; Tomé, M.; Pantera, A.; et al. D1.2: Current extent and trends of agroforestry in the EU27: AGFORWARD (Grant Agreement N° 613520) is co-funded by the European Commission, Directorate General for Research & Innovation, within the 7th Framework Programme of RTD. The views …						1
24	Malignier, N.; Balaguer, F. Annex to Deliverable 1.2: Current extent and trends of agroforestry in France: AGFORWARD (Grant Agreement N° 613520) is co-funded by the European Commission, Directorate General for Research & Innovation, within the 7th Framework Programme of RTD. The views and opinions expressed in this report are purely those of the writers and may not in any circumstances be regarde…						1
25	Mosquera-Losada; N, F.-D.; Fj, R.-R.; Jj, S.-F.; A, V.; A, R.-R. Bio-economy products: alternative uses of trees. Available online: http://agroforestrynet.eu/wp-content/uploads/2019/11/83ingles.pdf (accessed on 7 January 2022).							1
26	Losada-Fernández, E.; Mosquera-Losada; Ferreiro-Domínguez,N, Rodríguez-Rigueiro,Fj; Santiago-Freijanes, JJ, Villada, A; Rigueiro-Rodríguez, A. Bio-economy products: alternative uses of shrubs. Available online: http://agroforestrynet.eu/wp-content/uploads/2019/11/84ingles.pdf (accessed on 7 January 2022).							1
27	Böhm, C.; Tsonkova, P.; Mohr, T.; Schröder, C.; Lorenz, C.; Marcel; Ludewig; Bösel, B.; Dommel, J.; Wagner, N.; et al. Konzept zur Förderung von Agroforstflächen als Agrarumwelt- und Klimamaßnahme (AUKM) im Rahmen des Kulturlandschaftsprogramms (KULAP) des Landes Brandenburg: Konzept zur Förderung von Agroforstflächen als Agrarumwelt- und Klimamaßnahme (AUKM) im Rahmen des Kulturlandschaftsprogra…						1
28	Lewandowski, I.; Cossel, M.v. Welche Biomassepflanzen braucht eine nachhaltige Bioökonomie? Ökologie und Bioökonomie; Dr. Friedrich Pfeil: München, 2019, ISBN 978-3-89937-246-5.						1
29	Fehrenbach, H.; Köppen, S.; Breitmayer, E.; Essel, R.; Baur, F.; Kay, S.; Wern, B.; Bienge, K.; Geibler, J.v.; Kauertz, B.; et al. Biomassekaskaden - Mehr Ressourceneffizienz durch stoffliche Kaskadennutzung von Biomasse – von der Theorie zur Praxis; Umweltbundesamt (UBA), Ed., 2017.						1
30	Thrän, D.; Lauer, M.; Dotzauer, M.; Kalcher, J.; Oehmichen, K.; Majer, S.; Millinger, M.; Jordan, M. Technoökonomische Analyse und Transformationspfade des energetischen Biomassepotentials (TATBIO): Endbericht; DBFZ Deutsches Biomasseforschungszentrum gemeinnützige GmbH, Ed., Leipzig, 2019.						1
31	Thrän, D.; Szarka, N.; Haufe, H.; Lenz, V.; Majer, S.; Oehmichen, K.; Jordan, M.; Millinger, M.; Schaldach, R.; Schüngel, J. BioplanW: Systemlösungen Bioenergie im Wärmesektor im Kontext zukünftiger Entwicklungen: Schlussbericht; DBFZ Deutsches Biomasseforschungszentrum gemeinnützige GmbH, Ed.; DBFZ Report No. 36, Leipzig, 2020.						1
		8	1	0	0	0	18	3	30

## Sheet: D6 Paludikultur
ID	Source	Reviewed with DOI	University publication	Proceedings	Databases/Statistical Office	Books	Project Reports/Discussion Paper	Webpage
1	German Emissions Trading Authority (DEHSt) at German Environment Agency. Factsheet: Peatlands 2020.						1
2	Tanneberger, F.; Schröder, C.; Hohlbein, M.; Lenschow, U.; Permien, T.; Wichmann, S.; Wichtmann, W. Climate Change Mitigation through Land Use on Rewetted Peatlands – Cross-Sectoral Spatial Planning for Paludiculture in Northeast Germany. Wetlands 2020, 130, 219, doi:10.1007/s13157-020-01310-8.	1
3	Abel, S.; Barthelmes, A.; Gaudig, G.; Joosten, H.; Nordt, A.; Peters, J. Klimaschutz auf Moorböden: Lösungsansätze und Best-Practice-Beispiele; Greifswald Moor Centrum, Ed.; Greifswalder Moor Centrum-Schriftenreihe No. 03, 2019.						1
4	Wichmann, S. Economic incentives for climate smart agriculture on peatlands in the EU. Project CINDERELLA -Comparative analysis,; University of Greifswald, Ed., 2018.						1
5	Dahms, T.; Oehmke, C.; Kowatsch, A.; Abel, S.; Wichmann, S.; Wichtmann, W.; Schröder, C. Halmgutartige Festbrennstoffe aus nassen Mooren: Paludi-Pellets-Broschüre; Universität Greifswald, Ed., 2017.						1
6	Naturkapital und Klimapolitik: Synergien und Konflikte; Hartje, V.; Wüstemann, H.; Bonn, A., Eds.; Technische Universität Berlin; Helmholtz-Zentrum für Umweltforschung - UFZ: Berlin, Leipzig, 2015, ISBN 9783944280158.						1
7	Roßkopf, N.; Fell, H.; Zeitz, J. Organic soils in Germany, their distribution and carbon stocks. CATENA 2015, 133, 157–170, doi:10.1016/j.catena.2015.05.004.	1
8	Landesamt für Landwirtschaft, Umwelt und Ländliche Räume Schleswig-Holstein. Potentiale und Ziele zum Moor- und Klimaschutz: Gemeinsame Erklärung der Naturschutzbehörden; Flintbek, 2012, ISBN 978-3-937937-62-5.						1
9	Wichtmann, W.; Joosten, H. Paludiculture: Peat formation and renewable resources from rewetted peatlands; International Mire Conservation Group, Ed.; IMCG Newsletter No. 3, 2007.						1
10	Scheffler, M.; Wiegmann, K. Quantifizierung von Maßnahmenvorschlägen der deutschen Zivilgesellschaft zu THG - Minderungspotenzialen in der Landwirtschaft bis 2030: Kurzstudie im Auftrag der Klima-Allianz Deutschland; Öko-Institut e.V., Ed., Berlin, 2019.						1
		2	0	0	0	0	8	0	10

## Sheet: D7 Forst areas
ID	Source	Reviewed with DOI	University publication	Proceedings	Databases/Statistical Office	Books	Project Reports/Discussion Paper	Webpage
1	Bolte, A.; Höhl, M.; Hennig, P.; Schad, T.; Kroiher, F.; Seintsch, B.; Englert, H.; Rosenkranz, L. Zukunftsaufgabe Waldanpassung 2021.						1
2	Schulze, E.-D.; Rock, J.; Kroiher, F.; Egenolf, V.; Welbrock, N.; Irslinger, R.; Bolte, A.; Spellmann, H. Klimaschutz mit Wald : Speicherung von Kohlenstoff im Ökosystem und Substitution fossiler Brennstoffe; Thünen-Institut für Internationale Waldwirtschaft und Forstökonomie, Ed., 2021, doi:10.11576/biuz-.	1
3	Agrarsoziale Gesellschaft e.V. Wald im Klimawandel; Agrarsoziale Gesellschaft e.V., Ed.; Ländlicher Raum, Göttingen, 2020.						1
4	Bundesamt für Naturschutz. Wälder im Klimawandel: Steigerung von Anpassungsfähigkeit und Resilienz durch mehr Vielfalt und Heterogenität; Bundesamt für Naturschutz, Ed., Bonn-Bad Godesberg, 2020.						1
5	Schulze, E.D.; Sierra, C.A.; Egenolf, V.; Woerdehoff, R.; Irslinger, R.; Baldamus, C.; Stupak, I.; Spellmann, H. The climate change mitigation effect of bioenergy from sustainably managed forests in Central Europe. GCB Bioenergy 2020, 12, 186–197, doi:10.1111/gcbb.12672.	1
6	Wissenschaftlicher Beirat Waldpolitik beim BMEL. Eckpunkte der Waldstrategie 2050; Wissenschaftlicher Beirat Waldpolitik beim BMEL, Ed., Berlin, 2020.						1
7	Leskinen, P.; Cardellini, G.; González-García, S.; Hurmekoski, E.; Sathre, R.; Seppälä, J.; Smyth, C.; Stern, T.; Verkerk, P.J. Substitution effects of wood-based products in climate change mitigation; European Forest Institute, Ed.; From Science to Policy 7, 2018, doi:10.36333/fs07.						1
8	Bauhus; Jürgen. Beiträge der Forst- und Holzwirtschaft zum Klimaschutz. Allgemeine Forstzeitschrift für Waldwirtschaft und Umweltvorsorge 2017, 10–14.						1
9	Kristin Gerber, Steffi Röhling, Karsten Dunger, Susann Klatt, Katja Oehmichen. Regionalisierte Ergebnisse der alternativen WEHAM-Szenarien; Thünen Working Paper No. 102, Eberswalde, 2018.						1
10	Schier, F.; Weimar, H. Holzmarktmodellierung - Szenarienbasierte Folgenabschätzung verschiedener Rohholzangebotssituationen für den Sektor Forst und Holz; Thünen Working Paper No. 91, Hamburg, 2018.						1
11	Glasenapp, S.; Döring, P.; Blanke, C.; Mantau, U. Entwicklung von Holzverwendungsszenarien: Abschlussbericht WEHAM – AP 3.2; Universität Hamburg, Ed., 2017.						1
12	Rüter, S.; Stümer, W.; Dunger, K. Treibhausgasbilanzen der WEHAM-Szenarien. Allgemeine Forstzeitschrift für Waldwirtschaft und Umweltvorsorge 2017, 30–31.						1
13	Chirici, G.; Winter, S.; McRoberts, R.E. National Forest Inventories: Contributions to Forest Biodiversity Assessments; Springer Netherlands: Dordrecht, 2011, ISBN 978-94-007-0481-7.						1
14	Reise, J.; Kukulka, F.; Trotzer, S.; Winter, S. Biodiversität in Zahlen – Die Bundeswaldinventur als Grundlage für ein Biodiversitätsmonitoring im Wald: WEHAM-Szenarien; Johann Heinrich von Thünen-Institut, Ed., 2017. Available online: https://www.weham-szenarien.de/fileadmin/weham/Ergebnisse/Biodiversitaet_in_Zahlen_-_Die_Bundeswaldinventur_als_Grundlage_fu__r_ein_Biodiversitaetsmonitoring_im_Wa…	1
15	Oehmichen, K.; Klatt, S.; Gerber, K.; Polley, H.; Röhling, S.; Dunger, K. Die alternativen WEHAM-Szenarien: Holzpräferenz, Naturschutzpräferenz und Trendfortschreibung : Szenarienentwicklung, Ergebnisse und Analyse; Johann Heinrich von Thünen-Institut, Ed.; Thünen Report No. 59, Braunschweig. Available online: doi:10.3220/REP1527686002000 (accessed on 1 December 2021), doi:10.3220/REP152768600200…	1
16	Döring, P.; Glasenapp, S.; Mantau, U. Regionale Derbholzverwendung und Vergleich zum WEHAM-Derbholzpotenzial: Abschlussbericht zum Teilvorhaben des Verbundforschungsprojekts WEHAM-Szenarien (AP 3.2) 2017.						1
17	Bringezu, S.; Banse, M.; Ahmann, L.; Bezama, N.A.; Billig, E.; Bischof, R.; Blanke, C.; Brosowski, A.; Brüning, S.; Borchers, M.; et al. Pilotbericht zum Monitoring der deutschen Bioökonomie; Center for Environmental Systems Research (CESR) Universität Kassel, Ed., Kassel, 2020, doi:10.17170/kobra-202005131255.	1
		5	0	0	0	0	12	0	17

## Sheet: D8 Microorganism
ID	Source	Reviewed with DOI	University publication	Proceedings	Databases/Statistical Office	Books	Project Reports/Discussion Paper	Webpage
1	Agentur für Erneuerbare Energien e.V. Wärme und Kälte aus Erneuerbaren Energien in Deutschland 2020. Available online: https://www.unendlich-viel-energie.de/mediathek/grafiken/waerme-und-kaelte-aus-erneuerbaren-energien-in-deutschland-2020 (accessed on 2 December 2021).				1
2	BDEW Bundesverband der Energie- und Wasserwirtschaft e.V. Bruttostromerzeugung nach Energieträgern in Deutschland: Vorjahresvergleich. Available online: https://www.bdew.de/media/documents/Bruttostromerz_D_Vgl_VJ_online_o_jaehrlich_Ki_19112021.pdf (accessed on 2 December 2021).				1
3	Orsi, E.; Beekwilder, J.; Eggink, G.; Kengen, S.W.M.; Weusthuis, R.A. The transition of Rhodobacter sphaeroides into a microbial cell factory. Biotechnol. Bioeng. 2021, 118, 531–541, doi:10.1002/bit.27593.	1
4	Kunz, S.; Wach, W.; Kraus, W. Biorefinery Zeitz of the Südzucker Group – Status Quo and Future Perspectives. Chemie Ingenieur Technik 2020, 92, 1752–1763, doi:10.1002/cite.202000061.	1
5	Springer-Verlag GmbH; Springer Spektrum Redaktion Biospektrum. Beiträge zu "Mirkobiellen Biofabriken", 26th ed.; Heidelberg, 2020. BioSpektrum, 26 (4). Available online: https://www.biospektrum.de/magazine/4-2020 (accessed on 1 December 2021).						1
6	Voigt, C.A. Synthetic biology 2020-2030: Six commercially-available products that are changing our world. Nat. Commun. 2020, 11, 6379, doi:10.1038/s41467-020-20122-2.	1
7	Cavicchioli, R.; Ripple, W.J.; Timmis, K.N.; Azam, F.; Bakken, L.R.; Baylis, M.; Behrenfeld, M.J.; Boetius, A.; Boyd, P.W.; Classen, A.T.; et al. Scientists' warning to humanity: Microorganisms and climate change. Nat. Rev. Microbiol. 2019, 17, 569–586, doi:10.1038/s41579-019-0222-5.	1
8	McCarty, N.S.; Ledesma-Amaro, R. Synthetic Biology Tools to Engineer Microbial Communities for Biotechnology. Trends Biotechnol. 2019, 37, 181–197, doi:10.1016/j.tibtech.2018.11.002.	1
9	Construction biotechnology: Biogeochemistry, microbiology and biotechnology of construction materials and processes; Ivanov, V.; Stabnikov, V., Eds.; Green energy and technology; Springer: Singapore, 2017, ISBN 978-981-10-1445-1.					1
10	Vitorino, L.C.; Bessa, L.A. Technological Microbiology: Development and Applications. Front. Microbiol. 2017, 8, 827, doi:10.3389/fmicb.2017.00827.	1
11	Chubukov, V.; Mukhopadhyay, A.; Petzold, C.J.; Keasling, J.D.; Martín, H.G. Synthetic and systems biology for microbial production of commodity chemicals. NPJ Syst. Biol. Appl. 2016, 2, 16009, doi:10.1038/npjsba.2016.9.	1
12	Murphy, C.D. The microbial cell factory. Org. Biomol. Chem. 2012, 10, 1949–1957, doi:10.1039/c2ob06903b.	1
13	Zentrale Kommission für die Biologische Sicherheit. Synthetic Biology: 2nd Interim report of the German Central Committee on Biological Safety 2018.						1
14	Takkellapati, S.; Li, T.; Gonzalez, M.A. An Overview of Biorefinery Derived Platform Chemicals from a Cellulose and Hemicellulose Biorefinery. Clean Technol. Environ. Policy 2018, 20, 1615–1630, doi:10.1007/s10098-018-1568-5.	1
15	Lindorfer, J., Lettner, M., Hesser, F., Fazeni, K., Rosenfeld, D., Annevelink, B., Mandl, M. Technical, Economic and Environmental Assessment of Biorefinery Concepts: Developing a practical approach for characterisation; International Energy Agency (IEA) Bioenergy Task 43, Ed., 2019, ISBN 978-1-910154-64-9						1
16	Bezama, A.; Ingrao, C.; O’Keeffe, S.; Thrän, D. Resources, Collaborators, and Neighbors: The Three-Pronged Challenge in the Implementation of Bioeconomy Regions. Sustainability 2019, 11, 7235, doi:10.3390/su11247235	1
		10	0	0	2	1	3	0	16

## Sheet: D9 Smart farming
ID	Source	Reviewed with DOI	University publication	Proceedings	Databases/Statistical Office	Books	Project Reports/Discussion Paper	Webpage
1	Rohleder, B.; Krüsken, B.; Reinhardt, H. Digitalisierung der Landwirtschaft 2020; Bitkom; Deutscher Bauernverband; Rentenbank, Eds., 2020.						1
2	Beluhova-Uzunova, R.; Dunchev, D. Precision Farming - Concepts and perspectives. Problems of Agricultural Economics 2019, 360, 142–155, doi:10.30858/zer/112132.	1
3	Deutsche Bundesregierung. Antwort der Bundesregierung auf die Kleine Anfrage der Abgeordneten Dr. Kirsten Tackmann, Anke DomscheitBerg, Dr. Petra Sitte, weiterer Abgeordneter und der Fraktion DIE LINKE.: Risiken und Chancen der Digitalisierung in der Landwirtschaft für Gesellschaft und Gemeinwohl – Drucksache 19/15367 –, 2019.						1
4	Finger, R.; Swinton, S.M.; El Benni, N.; Walter, A. Precision Farming at the Nexus of Agricultural Production and the Environment. Annual Review of Resource Economics 2019, 11, 313–335, doi:10.1146/annurev-resource-100518-093929.	1
5	Paul, C.; Techen, A.-K.; Robinson, J.S.; Helming, K. Rebound effects in agricultural land and soil management: Review and analytical framework. Journal of Cleaner Production 2019, 227, 1054–1067, doi:10.1016/j.jclepro.2019.04.115.	1
6	Waltmann, M.; Gindele, N.; Doluschitz, R. Ökonomische Parameter in Precision Agriculture – strukturelle Anforderungen und Wirkungen in Deutschland: Digitalisierung in kleinstrukturierten Regionen, Lecture Notes in Informatics (LNI); Gesellschaft für Informatik, Ed. No. 275, Bonn, 2019.						1
7	Anter, J.; Kreins, P.; Heidecke, C.; Gömann, H. Entwicklung des regionalen Bewässerungsbedarfs – Engpässe in der Zukunft?: Tagungsband zur Fachtagung am 11./12.09.2017 in Suderburg; Thünen-Institut, Bundesforschungsinstitut für Ländliche Räume, Wald und Fischerei, Ed.; Thünen Report No. 85, 2017.						1
8	Balafoutis, A.; Beck, B.; Fountas, S.; Vangeyte, J.; Wal, T.; Soto, I.; Gómez-Barbero, M.; Barnes, A.; Eory, V. Precision Agriculture Technologies Positively Contributing to GHG Emissions Mitigation, Farm Productivity and Economics. Sustainability 2017, 9, 1339, doi:10.3390/su9081339.	1
9	Paustian, M.; Theuvsen, L. Adoption of precision agriculture technologies by German crop farmers. Precision Agric 2017, 18, 701–716, doi:10.1007/s11119-016-9482-5.	1
10	Giesler, S. Digitalisierung in der Landwirtschaft – vom Precision Farming zum Farming 4.0. Available online: https://www.biooekonomie-bw.de/fachbeitrag/dossier/digitalisierung-in-der-landwirtschaft-vom-precision-farming-zum-farming-40 (accessed on 7 January 2022).							1
11	Bovensiepen, G.; Hombach, R.; Raimund, S. Quo vadis, agricola? ; Pricewaterhouse Coopers AG Wirtschaftsprüfungsgesellschaft (PwC), Ed., 2016.						1
12	Rohleder, B.; Krüsken, B. Digitalisierung der Landwirtschaft; Berlin, 2016.						1
13	BMBF; BMEL. National Bioeconomy Strategy; BMBF; BMEL, Eds., Berlin, 2020.						1
14	High Level Panel of Experts on Food Security and Nutrition (HLPE). Agroecological and other innovative approaches for sustainable agriculture and food systems that enhance food security and nutrition: A report by the High Level Panel of Experts on Food Security and Nutrition of the Committee on World Food Security, Rome, 2019.						1
15	Bundesministerium für Ernährung und Landwirtschaft (BMEL) / Federal Ministry of Food and Agriculture (BMEL). Fachserie 3, Reihe 3.1.2, Reihe 3.1.3 und Reihe 3.2.1; BMEL (723) / Subject-matter series 3, series 3.1.2, series 3.1.3 and series 3.2.1; BMEL (723) (accessed on 12 January 2022).				1
16	Umweltbundesamt (UBA) / Federal Environment Agency. Wasserressourcen und ihre Nutzung / Water resources and their use. Available online: https://www.umweltbundesamt.de/daten/wasser/wasserressourcen-ihre-nutzung#die-wassernutzer (accessed on 12 January 2022).				1
17	Umweltbundesamt (UBA) / Federal Environment Agency. Pflanzenschutzmittelverwendung in der Landwirtschaft / Use of plant protection products in agriculture (accessed on 12 January 2022)				1
		5	0	0	3	0	8	1	17

[truncated: 10 more sheets: D10 Organic farming, D11 Ecosystem Services, D12 Production plants of bioeco, D13 Digitisation, D14 Cascade principle, D15 Fully recyable biopolymers, D16 Environmental friendly chem, D17 National population develop, D18 Behavourial changes, D19 Rural development]
